# Supplementary material for: Amidinoquinoxaline N-oxides: spin trapping of O- and C-centered radicals
Source: Royal Society of Chemistry journal article supplement (doi:10.1039/c7ob01387f), 2017-01-01
Supplement: c7ob01387f1.pdf [file c7ob01387f1.pdf]

# **AMIDINOQUINOXALINE N-OXIDES: SPIN TRAPPING OF O- AND C-CENTERED RADICALS**

Nadia Gruber,<sup>a,b</sup> Liliana R. Orelli,<sup>b\*</sup> Roberto Cipolletti,<sup>a</sup> Pierluigi Stipa<sup>a\*</sup>

<sup>a</sup> SIMAU Dept. – Chemistry Division, Università Politecnica delle Marche, Via Brecce Bianche 12, Ancona (I-60131) Italy; <sup>b</sup> Departamento de Química Orgánica. Facultad de Farmacia y Bioquímica, Universidad de Buenos Aires, CONICET, Junín 956, (1113) Buenos Aires, Argentina.

p.stipa@univpm.it; lorelli@ffyb.uba.ar

# Table of contents

|                                                                                                                                                  |         |
|--------------------------------------------------------------------------------------------------------------------------------------------------|---------|
| <b>Scheme 1 SI:</b> Synthesis of nitrones <b>1-5</b>                                                                                             | S4      |
| <b>Table 1 SI:</b> Selected bond distances and dihedral angles for nitrones <b>1-5</b> computed at the B3LYP/6-31+G(d,p)// B3LYP/6-31G(d) level. | S4      |
| <b>Figures 1-6 SI:</b> <sup>1</sup> H and <sup>13</sup> C NMR spectra of compounds <b>4, 8, 9</b>                                                | S5-S7   |
| <b>M062X/6-31+G(d,p)//B3LYP/6-31G(d) cartesian coordinates and thermochemical parameters from frequency calculations of nitrones 1-5:</b>        | S8-S12  |
| Nitrone <b>1</b>                                                                                                                                 | S8      |
| Nitrone <b>2</b>                                                                                                                                 | S9      |
| Nitrone <b>3</b>                                                                                                                                 | S10     |
| Nitrone <b>4</b>                                                                                                                                 | S11     |
| Nitrone <b>5</b>                                                                                                                                 | S12     |
| <b>M062X/6-31+G(d,p)//B3LYP/6-31G(d) cartesian coordinates and thermochemical parameters from frequency calculations of all aminoxyls:</b>       | S13-S72 |
| Aminoxyls <b>1a</b>                                                                                                                              | S13     |
| Aminoxyls <b>1b</b>                                                                                                                              | S15     |
| Aminoxyls <b>1c</b>                                                                                                                              | S18     |
| Aminoxyls <b>1d</b>                                                                                                                              | S22     |
| Aminoxyls <b>1e</b>                                                                                                                              | S24     |
| Aminoxyls <b>2a</b>                                                                                                                              | S28     |
| Aminoxyls <b>2b</b>                                                                                                                              | S31     |
| Aminoxyls <b>2c</b>                                                                                                                              | S33     |

|                     |     |
|---------------------|-----|
| Aminoxyls <b>2d</b> | S38 |
| Aminoxyls <b>2e</b> | S40 |
| Aminoxyls <b>3a</b> | S45 |
| Aminoxyls <b>3b</b> | S46 |
| Aminoxyls <b>3c</b> | S47 |
| Aminoxyls <b>3d</b> | S49 |
| Aminoxyls <b>3e</b> | S50 |
| Aminoxyls <b>4a</b> | S52 |
| Aminoxyls <b>4b</b> | S53 |
| Aminoxyls <b>4c</b> | S55 |
| Aminoxyls <b>4d</b> | S57 |
| Aminoxyls <b>4e</b> | S58 |
| Aminoxyls <b>5a</b> | S60 |
| Aminoxyls <b>5b</b> | S63 |
| Aminoxyls <b>5c</b> | S65 |
| Aminoxyls <b>5d</b> | S69 |
| Aminoxyls <b>5e</b> | S72 |

**Table 2 SI:** selected EPR parameters and Energies of isomeric **1b** spin adducts from relaxed PES scan of dihedral angles: S76

**Figure 7 SI:** B3LYP/6-31G(d) optimised geometries of isomeric **1b** spin adducts from relaxed PES scan of dihedral angles: S77

**Table 3 SI:** relative energies (Kcal/mol) and IHB distances (Å) and angles (°) for OH· and OOH· adducts: S78

**Figure 8 SI:** IHB distances and angles in **3c** and **3e** adducts: S79

**Table 4 SI:** N(19) Pyramidalization degree S79

**Scheme 1 SI:** Synthesis of nitrones **1-5**

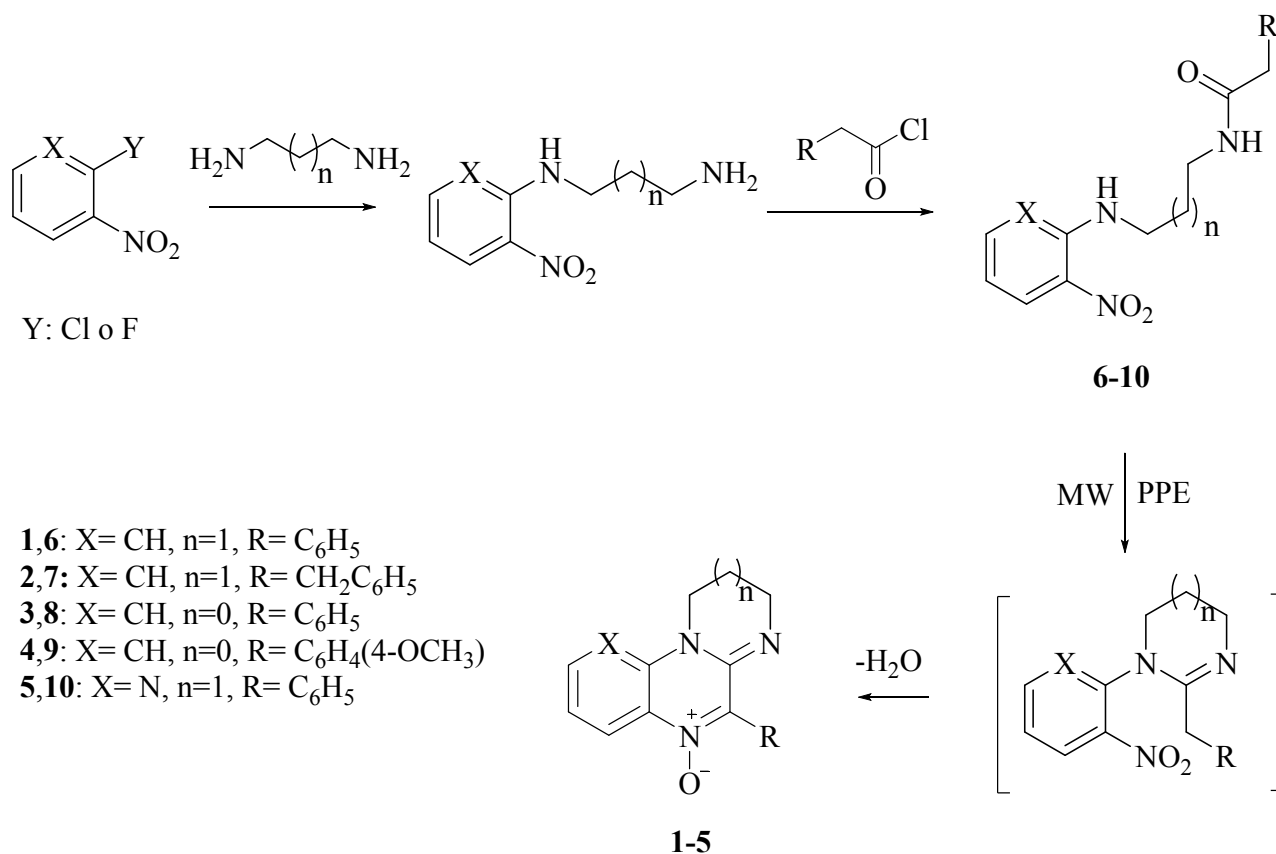

**Table 1 SI:** Selected bond distances (Å), dihedral angles (°) for nitrones **1-5** computed at the B3LYP/6-31+G(d,p)// B3LYP/6-31G(d) level.

| Nitrone  | N(19)-C(8) | N(19)-O(22) | C(8)-N(19)-C(3)-C(4) |
|----------|------------|-------------|----------------------|
| <b>1</b> | 1.33966    | 1.2748      | 4.075                |
| <b>2</b> | 1.33021    | 1.27925     | 4.278                |
| <b>3</b> | 1.34890    | 1.27286     | 0.151                |
| <b>4</b> | 1.35041    | 1.27511     | 0.590                |
| <b>5</b> | 1.34027    | 1.27563     | 1.280                |

## $^1\text{H}$ and $^{13}\text{C}$ NMR spectra of compounds 4, 8, 9

Figure 1 SI.  $^1\text{H}$  NMR spectrum of compound 4 (600 MHz,  $\text{CDCl}_3$ ).

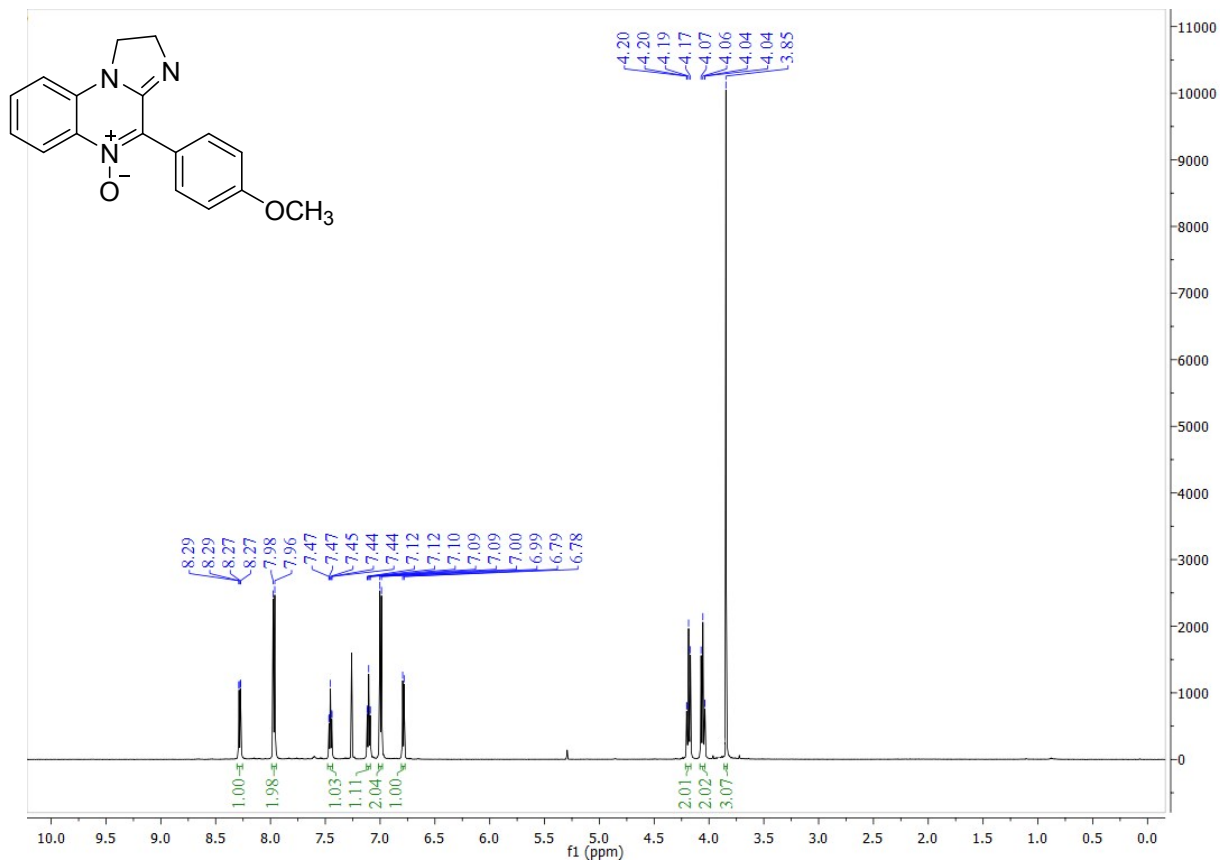

Figure 2 SI.  $^{13}\text{C}$  NMR spectrum of compound 4 (125 MHz,  $\text{CDCl}_3$ ).

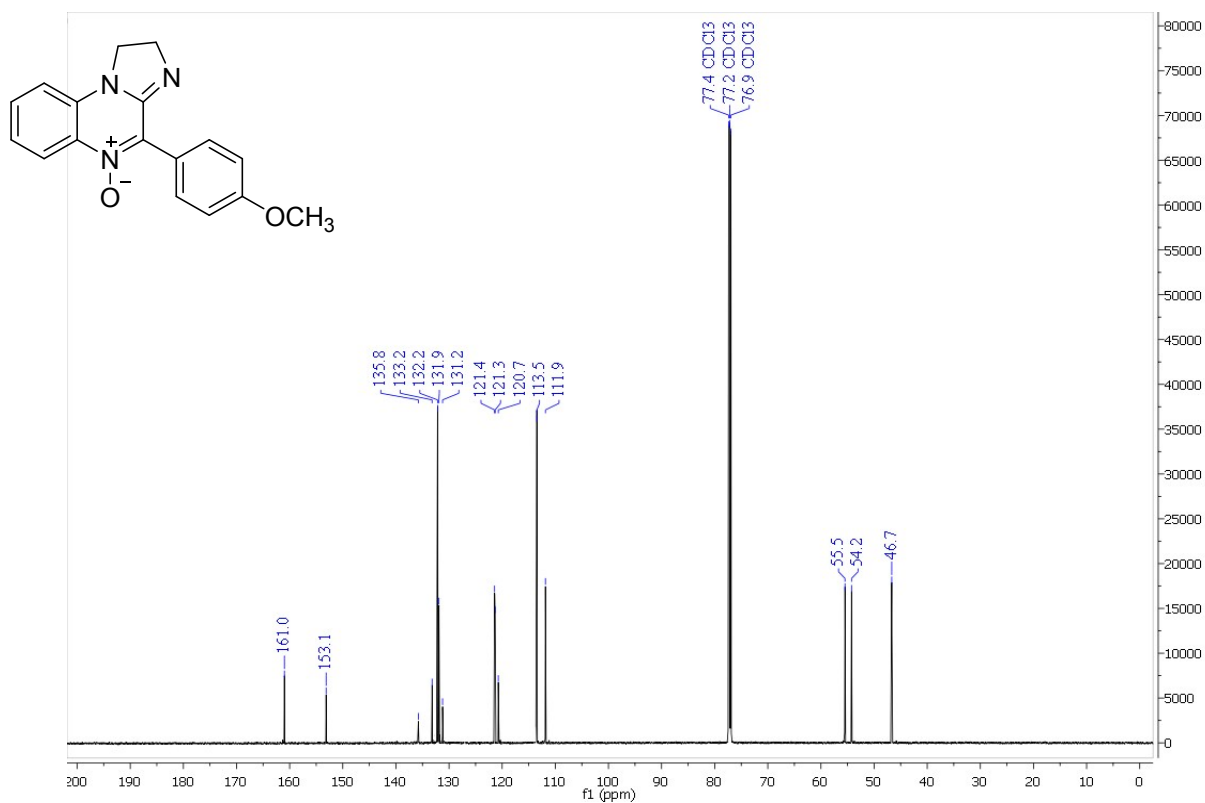

**Figure 3 SI.**  $^1\text{H}$  NMR spectrum of compound **8** (500 MHz,  $\text{CDCl}_3$ ).

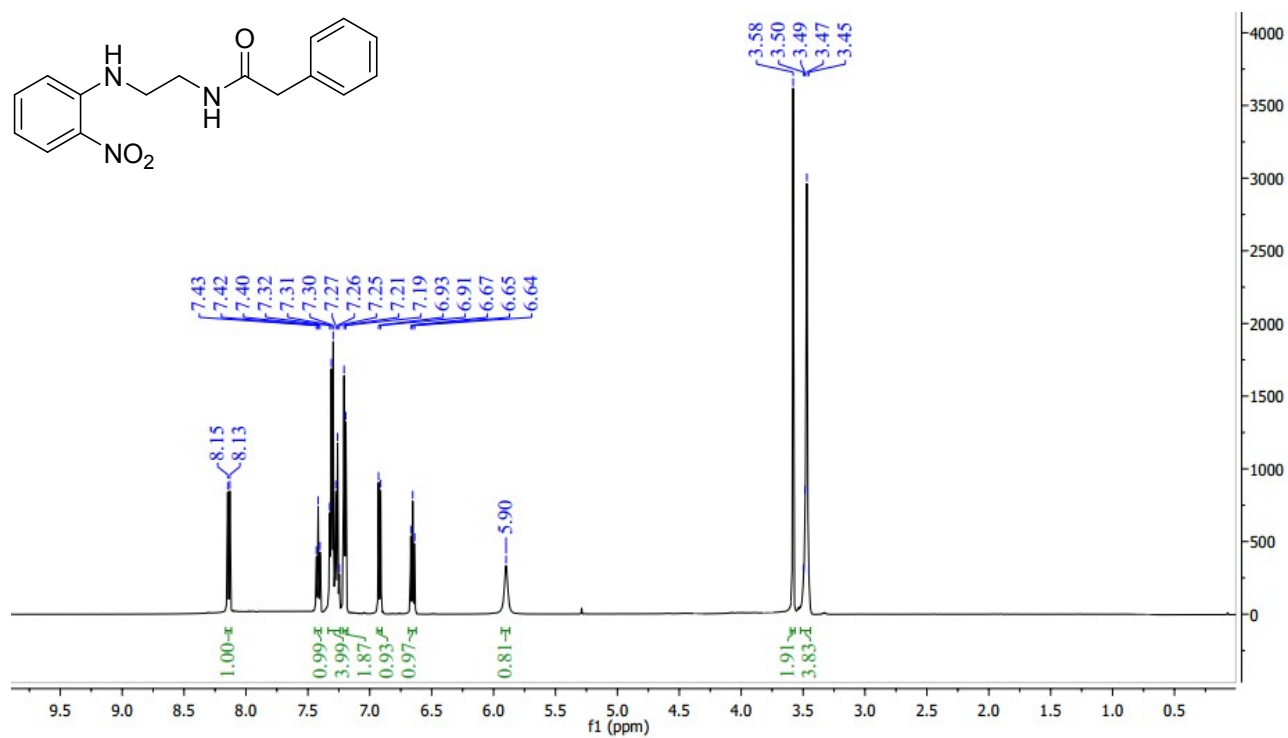

**Figure 4 SI.**  $^{13}\text{C}$  NMR spectrum of compound **8** (125 MHz,  $\text{CDCl}_3$ ).

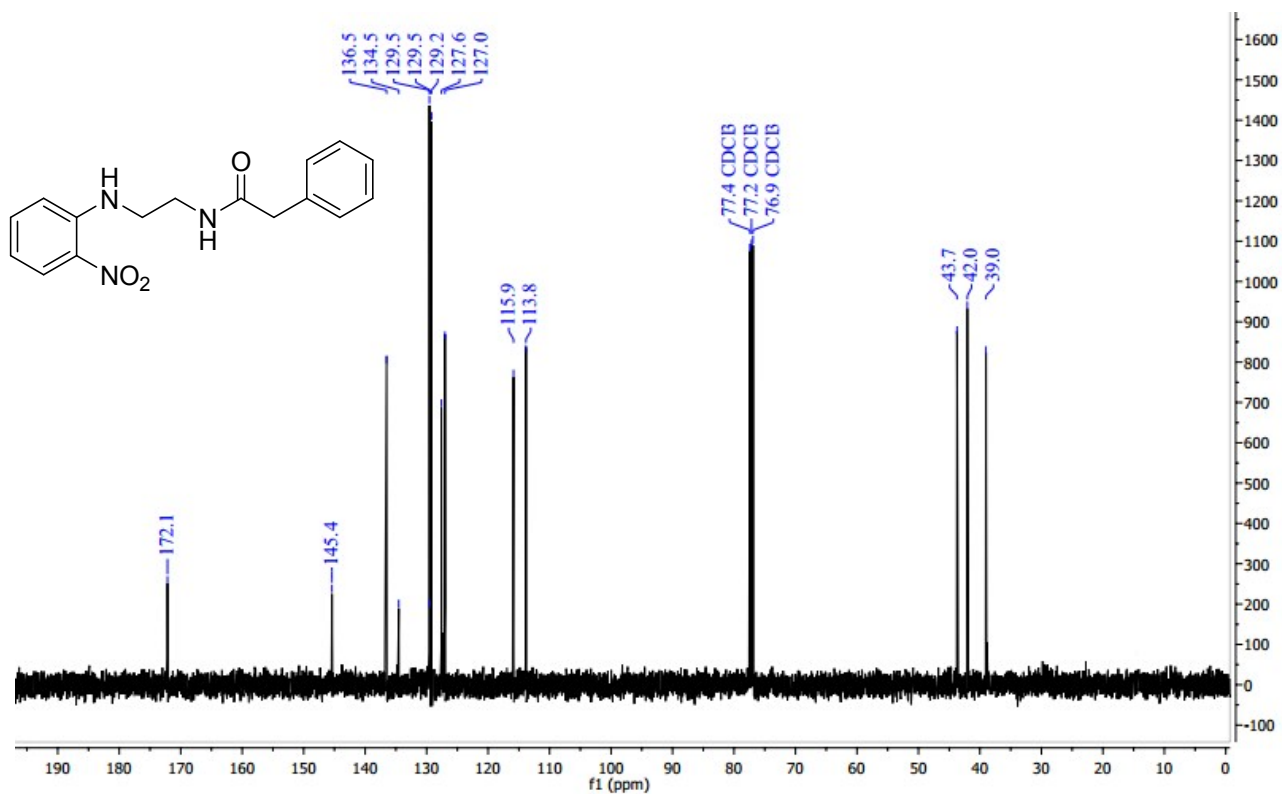

**Figure 5 SI.**  $^1\text{H}$  NMR spectrum of compound **9** (300 MHz,  $\text{CDCl}_3$ ).

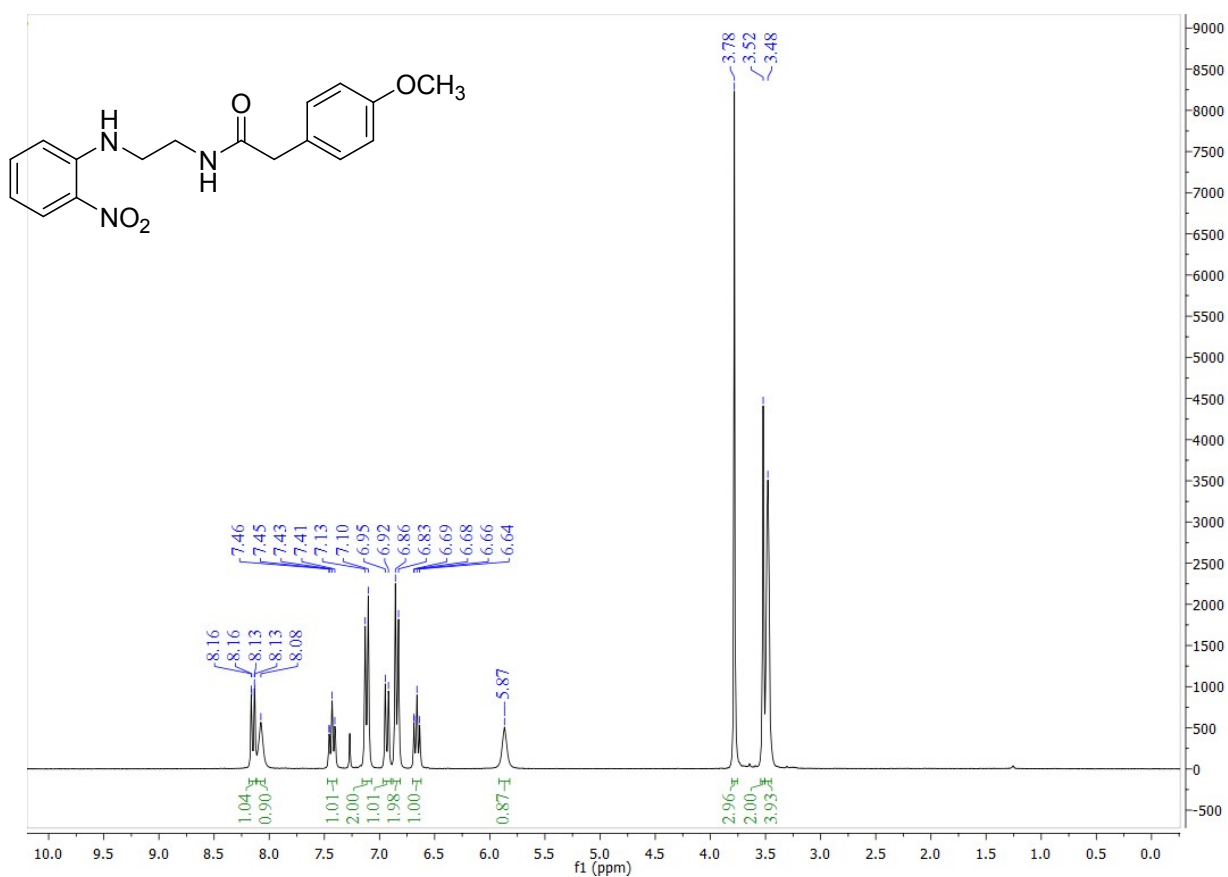

**Figure 6 SI.**  $^{13}\text{C}$  NMR spectrum of compound **9** (75 MHz,  $\text{CDCl}_3$ ).

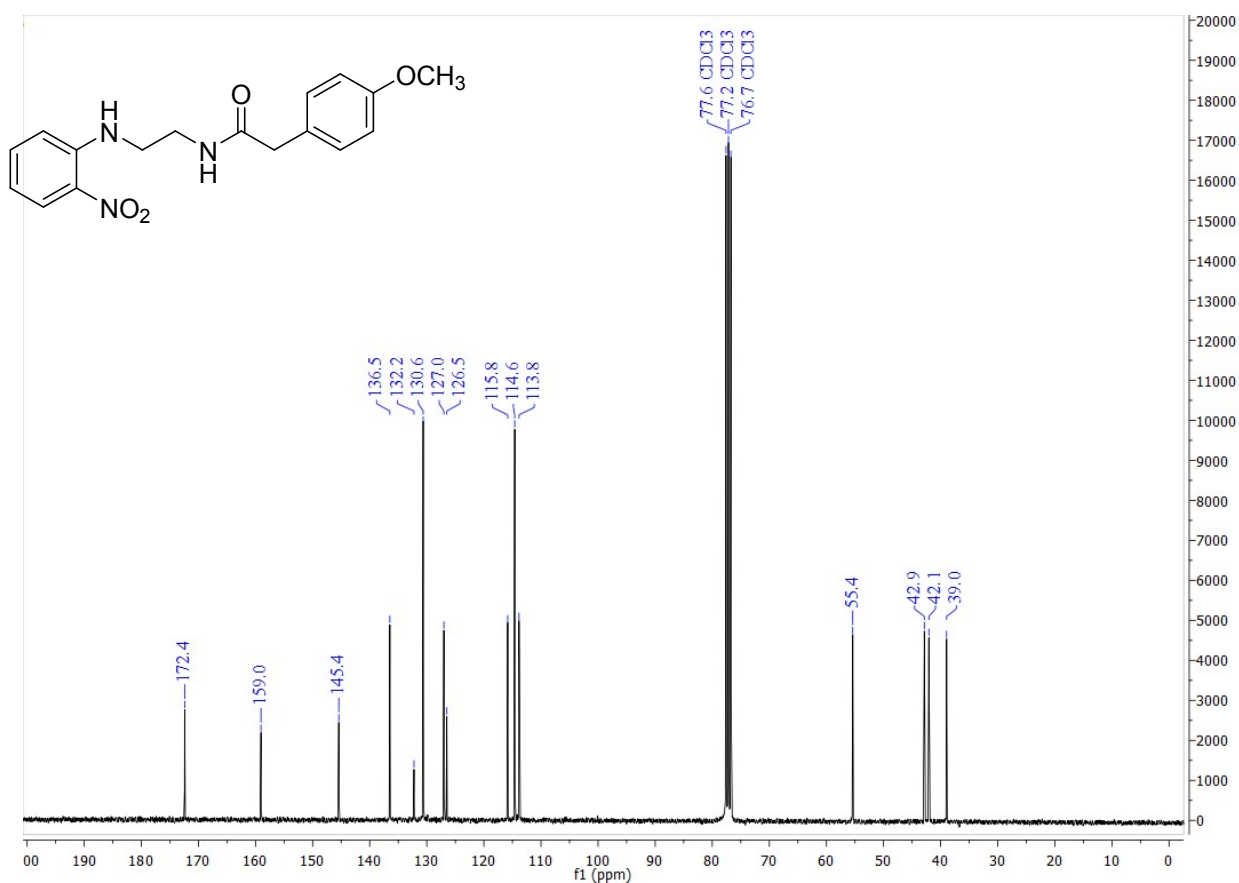

**M062X/6-31+G(d,p)//B3LYP/6-31G(d) cartesian coordinates and thermochemical parameters  
from frequency calculations of nitrones 1-5.**

**Nitron 1**

|   |             |             |             |
|---|-------------|-------------|-------------|
| C | -3.67429700 | -2.45247300 | -0.08653400 |
| C | -2.28515500 | -2.49154600 | -0.10050900 |
| C | -1.55697900 | -1.30359700 | -0.06203600 |
| C | -2.19092400 | -0.04895600 | -0.01589000 |
| C | -3.59871200 | -0.02827600 | 0.00500400  |
| C | -4.32318100 | -1.21617100 | -0.03119500 |
| C | -0.02234600 | 1.04563800  | 0.17692900  |
| C | 0.61798300  | -0.27065800 | 0.00925000  |
| C | 0.11973600  | 3.36314700  | 0.59821700  |
| C | -1.09957800 | 3.53349600  | -0.30629600 |
| C | -2.09429200 | 2.41357700  | -0.02302700 |
| H | -4.24495400 | -3.37521700 | -0.11537300 |
| H | -1.72764800 | -3.41808900 | -0.14470500 |
| H | -4.13048100 | 0.91275800  | 0.06450500  |
| H | -5.40852300 | -1.17023800 | -0.01084200 |
| H | -0.17102800 | 3.51182400  | 1.65130000  |
| H | -0.78031300 | 3.48968100  | -1.35469800 |
| H | -2.85803800 | 2.38038200  | -0.80713400 |
| N | -0.12292800 | -1.38233700 | -0.09023000 |
| N | -1.42233600 | 1.10585800  | 0.01584500  |
| N | 0.73069700  | 2.05557900  | 0.44505300  |
| O | 0.37719500  | -2.54807800 | -0.21690300 |
| C | 2.09362000  | -0.39219600 | -0.01934900 |
| C | 2.86281900  | 0.47330300  | -0.81452900 |
| C | 2.75317200  | -1.37429200 | 0.73874200  |
| C | 4.25005400  | 0.35611000  | -0.85497200 |
| H | 2.36928300  | 1.24266200  | -1.39586400 |
| C | 4.14232100  | -1.47380400 | 0.71322800  |
| H | 2.17380300  | -2.06455000 | 1.33901700  |
| C | 4.89644400  | -0.61398500 | -0.08716300 |
| H | 4.82695900  | 1.02873200  | -1.48419800 |
| H | 4.63533200  | -2.23373900 | 1.31366500  |
| H | 5.97961600  | -0.70096300 | -0.11423900 |
| H | -2.60792000 | 2.58771800  | 0.93298600  |
| H | -1.59286700 | 4.49963800  | -0.15170900 |
| H | 0.87707500  | 4.12443700  | 0.37860700  |

|                                              |                             |
|----------------------------------------------|-----------------------------|
| Zero-point correction=                       | 0.292532 (Hartree/Particle) |
| Thermal correction to Energy=                | 0.308018                    |
| Thermal correction to Enthalpy=              | 0.308962                    |
| Thermal correction to Gibbs Free Energy=     | 0.250009                    |
| Sum of electronic and zero-point Energies=   | -895.638929                 |
| Sum of electronic and thermal Energies=      | -895.623442                 |
| Sum of electronic and thermal Enthalpies=    | -895.622498                 |
| Sum of electronic and thermal Free Energies= | -895.681452                 |



## Nitrone 2

|   |             |             |             |
|---|-------------|-------------|-------------|
| C | -3.79181500 | -2.43398000 | -0.48070900 |
| C | -2.50439900 | -2.45518000 | 0.04212300  |
| C | -1.79267600 | -1.26509700 | 0.17811500  |
| C | -2.33640300 | -0.02573500 | -0.21008800 |
| C | -3.64481500 | -0.02347700 | -0.72990900 |
| C | -4.35528000 | -1.21304600 | -0.86143300 |
| C | -0.34627200 | 1.11633600  | 0.60309800  |
| C | 0.21020800  | -0.19398000 | 0.94224100  |
| C | -0.18294100 | 3.46963100  | 0.58652400  |
| C | -0.99357500 | 3.44309700  | -0.70815600 |
| C | -2.10603600 | 2.40572100  | -0.59024100 |
| H | -4.35146700 | -3.35773600 | -0.58729800 |
| H | -2.01465100 | -3.36864000 | 0.35425400  |
| H | -4.11647900 | 0.90774000  | -1.01703600 |
| H | -5.36433300 | -1.18014200 | -1.26284200 |
| H | -0.80932300 | 3.84231600  | 1.41395100  |
| H | -0.33202700 | 3.18092400  | -1.54244000 |
| H | -2.54607600 | 2.21395700  | -1.57401700 |
| N | -0.46718800 | -1.31791100 | 0.72460000  |
| N | -1.58448900 | 1.13391700  | -0.06601400 |
| N | 0.34197300  | 2.15912400  | 0.92710500  |
| O | 0.00324900  | -2.47460900 | 1.00248100  |
| H | -2.90718300 | 2.77068000  | 0.06759300  |
| H | -1.43661300 | 4.42002500  | -0.93137800 |
| H | 0.65887300  | 4.16617500  | 0.50114700  |
| C | 1.58010300  | -0.30269300 | 1.55090300  |
| H | 1.74588600  | 0.59350900  | 2.15072600  |
| H | 1.58386400  | -1.18329400 | 2.19888700  |
| C | 2.68208100  | -0.42698400 | 0.50270600  |
| C | 3.39561300  | 0.70497800  | 0.08850300  |
| C | 2.99235600  | -1.67018800 | -0.06698000 |
| C | 4.40610000  | 0.59708200  | -0.86853400 |
| H | 3.14700100  | 1.67150300  | 0.51753200  |
| C | 4.00157500  | -1.77641400 | -1.02505900 |
| H | 2.43063200  | -2.54641200 | 0.24149400  |
| C | 4.71313800  | -0.64447600 | -1.42794100 |
| H | 4.95559700  | 1.48395300  | -1.17503200 |
| H | 4.23427200  | -2.74746200 | -1.45529500 |
| H | 5.50218000  | -0.72971400 | -2.17090500 |

|                                              |                             |
|----------------------------------------------|-----------------------------|
| Zero-point correction=                       | 0.321208 (Hartree/Particle) |
| Thermal correction to Energy=                | 0.337976                    |
| Thermal correction to Enthalpy=              | 0.338920                    |
| Thermal correction to Gibbs Free Energy=     | 0.276233                    |
| Sum of electronic and zero-point Energies=   | -934.915517                 |
| Sum of electronic and thermal Energies=      | -934.898749                 |
| Sum of electronic and thermal Enthalpies=    | -934.897805                 |
| Sum of electronic and thermal Free Energies= | -934.960492                 |

### Nitrone 3

|   |             |             |             |
|---|-------------|-------------|-------------|
| C | -3.81617800 | -2.08728200 | -0.13149200 |
| C | -2.42971200 | -2.19620500 | -0.14159700 |
| C | -1.64584600 | -1.04506700 | -0.07669200 |
| C | -2.23614100 | 0.23150700  | -0.00316700 |
| C | -3.63830300 | 0.32995200  | 0.00843000  |
| C | -4.41319000 | -0.82328800 | -0.05517100 |
| C | -0.00925000 | 1.22167000  | 0.06630200  |
| C | 0.59918700  | -0.10245300 | -0.02376600 |
| C | -0.38868000 | 3.40715800  | 0.23381900  |
| C | -1.78904500 | 2.72291600  | 0.19290200  |
| H | -4.42918200 | -2.98144300 | -0.18174000 |
| H | -1.92279800 | -3.15074300 | -0.19798200 |
| H | -4.10726600 | 1.30637900  | 0.06576700  |
| H | -5.49592000 | -0.73377400 | -0.04536600 |
| H | -0.25088700 | 3.99316800  | 1.14997200  |
| H | -2.40275000 | 3.04430100  | -0.65672700 |
| N | -0.21015300 | -1.17973700 | -0.08670100 |
| N | -1.40544700 | 1.31838600  | 0.05101800  |
| N | 0.61976900  | 2.34312500  | 0.16921900  |
| O | 0.23375700  | -2.36994400 | -0.16740700 |
| C | 2.06639800  | -0.27143300 | -0.02424100 |
| C | 2.88225200  | 0.66077700  | -0.69289000 |
| C | 2.68561300  | -1.34072800 | 0.65251900  |
| C | 4.26814300  | 0.52176600  | -0.69101000 |
| H | 2.42620900  | 1.50048600  | -1.20042200 |
| C | 4.07242700  | -1.46026200 | 0.66737500  |
| H | 2.07649500  | -2.07735900 | 1.15823700  |
| C | 4.87069700  | -0.53578800 | -0.00893900 |
| H | 4.87791100  | 1.24762000  | -1.22234600 |
| H | 4.53007900  | -2.28740700 | 1.20354100  |
| H | 5.95263100  | -0.64014300 | -0.00524100 |
| H | -2.36997600 | 2.87058700  | 1.11166900  |
| H | -0.25402200 | 4.09602700  | -0.60913300 |

|                                              |                             |
|----------------------------------------------|-----------------------------|
| Zero-point correction=                       | 0.262522 (Hartree/Particle) |
| Thermal correction to Energy=                | 0.277350                    |
| Thermal correction to Enthalpy=              | 0.278294                    |
| Thermal correction to Gibbs Free Energy=     | 0.219901                    |
| Sum of electronic and zero-point Energies=   | -856.372445                 |
| Sum of electronic and thermal Energies=      | -856.357617                 |
| Sum of electronic and thermal Enthalpies=    | -856.356672                 |
| Sum of electronic and thermal Free Energies= | -856.415066                 |

## Nitrone 4

|   |             |             |             |
|---|-------------|-------------|-------------|
| C | -4.49404900 | -2.11982300 | -0.18265400 |
| C | -3.10627000 | -2.21242100 | -0.17020900 |
| C | -2.33665200 | -1.05227800 | -0.09214300 |
| C | -2.94434400 | 0.21626100  | -0.02814300 |
| C | -4.34724300 | 0.29873100  | -0.03920300 |
| C | -5.10776800 | -0.86349000 | -0.11568500 |
| C | -0.73028200 | 1.23301800  | 0.08466600  |
| C | -0.10160600 | -0.08406000 | 0.00309300  |
| C | -1.14279200 | 3.41401100  | 0.24790600  |
| C | -2.53196000 | 2.71037300  | 0.18487700  |
| H | -5.09528800 | -3.02139200 | -0.24308500 |
| H | -2.58701400 | -3.16068800 | -0.21866400 |
| H | -4.82842000 | 1.26965300  | 0.01076500  |
| H | -6.19151400 | -0.78685500 | -0.12335700 |
| H | -1.02925800 | 4.00561100  | 1.16379800  |
| H | -3.14001400 | 3.02896600  | -0.66976900 |
| N | -0.90108900 | -1.16916600 | -0.08038600 |
| N | -2.12657700 | 1.31275100  | 0.03867300  |
| N | -0.11943300 | 2.36361800  | 0.20446100  |
| O | -0.44237100 | -2.35620100 | -0.16059700 |
| C | 1.36251800  | -0.23678900 | 0.03268200  |
| C | 2.19029600  | 0.73362300  | -0.55845400 |
| C | 1.99060800  | -1.33375800 | 0.66614700  |
| C | 3.57902900  | 0.62385600  | -0.53353900 |
| H | 1.74331500  | 1.59732400  | -1.03186300 |
| C | 3.37031000  | -1.43795800 | 0.71352500  |
| H | 1.38561900  | -2.10689000 | 1.11817600  |
| C | 4.17997200  | -0.46502800 | 0.10796200  |
| H | 4.17569800  | 1.39258600  | -1.01117700 |
| H | 3.84930000  | -2.27679400 | 1.20880000  |
| H | -3.12621600 | 2.84337900  | 1.09753600  |
| H | -1.00310600 | 4.10156200  | -0.59555200 |
| O | 5.52396600  | -0.66953000 | 0.19833100  |
| C | 6.39095600  | 0.27984700  | -0.40259500 |
| H | 7.40438900  | -0.07836700 | -0.21256700 |
| H | 6.22676100  | 0.34675200  | -1.48607600 |
| H | 6.26835200  | 1.27587900  | 0.04252500  |

|                                              |                             |
|----------------------------------------------|-----------------------------|
| Zero-point correction=                       | 0.295633 (Hartree/Particle) |
| Thermal correction to Energy=                | 0.312887                    |
| Thermal correction to Enthalpy=              | 0.313831                    |
| Thermal correction to Gibbs Free Energy=     | 0.250283                    |
| Sum of electronic and zero-point Energies=   | -970.823398                 |
| Sum of electronic and thermal Energies=      | -970.806144                 |
| Sum of electronic and thermal Enthalpies=    | -970.805200                 |
| Sum of electronic and thermal Free Energies= | -970.868748                 |

## Nitrone 5

|   |             |             |             |
|---|-------------|-------------|-------------|
| C | 3.65741700  | -2.41797400 | 0.13886900  |
| C | 2.26762000  | -2.51253500 | 0.13347900  |
| C | 1.52637300  | -1.34067100 | 0.06290300  |
| C | 2.18866600  | -0.10107300 | 0.00150400  |
| C | 4.22859500  | -1.14706900 | 0.07387000  |
| C | 0.04658000  | 1.03776900  | -0.15301800 |
| C | -0.62119800 | -0.27222500 | -0.01022600 |
| C | -0.07691000 | 3.38447600  | -0.46019600 |
| C | 1.25553600  | 3.48610900  | 0.28231800  |
| C | 2.16789300  | 2.35133100  | -0.16514700 |
| H | 4.28080100  | -3.30399400 | 0.19142300  |
| H | 1.73466000  | -3.45370800 | 0.18457100  |
| H | 5.31030800  | -1.02685900 | 0.07563300  |
| H | 0.06862700  | 3.61561300  | -1.52758000 |
| H | 1.08036400  | 3.41604200  | 1.36317100  |
| H | 3.06655200  | 2.27612100  | 0.44782700  |
| N | 0.09640500  | -1.40143800 | 0.06888100  |
| N | 1.45486900  | 1.06361100  | -0.06935900 |
| N | -0.69221900 | 2.07362100  | -0.34380800 |
| O | -0.41603200 | -2.56545300 | 0.16742600  |
| C | -2.09784300 | -0.36771900 | 0.01724200  |
| C | -2.85260200 | 0.48954000  | 0.83524600  |
| C | -2.77234100 | -1.31986000 | -0.76584000 |
| C | -4.24155400 | 0.39324800  | 0.87202800  |
| H | -2.34682600 | 1.23418900  | 1.43737100  |
| C | -4.16283200 | -1.39709400 | -0.74352900 |
| H | -2.20388400 | -2.00364200 | -1.38382300 |
| C | -4.90296900 | -0.54558800 | 0.07862500  |
| H | -4.80794400 | 1.05821100  | 1.51859500  |
| H | -4.66789000 | -2.13300600 | -1.36345300 |
| H | -5.98741600 | -0.61522500 | 0.10291200  |
| H | 2.49606500  | 2.49975700  | -1.20229600 |
| H | 1.74904700  | 4.44552100  | 0.09089500  |
| H | -0.79050500 | 4.12744700  | -0.08432300 |
| N | 3.52433300  | -0.01248200 | 0.00441400  |

|                                              |                             |
|----------------------------------------------|-----------------------------|
| Zero-point correction=                       | 0.280505 (Hartree/Particle) |
| Thermal correction to Energy=                | 0.295916                    |
| Thermal correction to Enthalpy=              | 0.296861                    |
| Thermal correction to Gibbs Free Energy=     | 0.237865                    |
| Sum of electronic and zero-point Energies=   | -911.694511                 |
| Sum of electronic and thermal Energies=      | -911.679099                 |
| Sum of electronic and thermal Enthalpies=    | -911.678155                 |
| Sum of electronic and thermal Free Energies= | -911.737151                 |

**M062X/6-31+G(d,p)//B3LYP/6-31G(d) cartesian coordinates and thermochemical parameters  
from frequency calculations of all aminoxylys.**

**1a,*syn***

|   |             |             |             |
|---|-------------|-------------|-------------|
| C | 4.64646600  | -1.47047200 | -0.76268200 |
| C | 3.37706100  | -1.52955000 | -1.32488800 |
| C | 2.38732100  | -0.62133400 | -0.92813600 |
| C | 2.66878800  | 0.38379100  | 0.02764900  |
| C | 3.95310000  | 0.41781900  | 0.59051400  |
| C | 4.92854700  | -0.50079900 | 0.20174700  |
| C | 0.43662200  | 1.30863500  | -0.27917600 |
| C | -0.04783400 | -0.08324600 | -0.72067900 |
| C | 0.13250100  | 3.60836100  | 0.05153400  |
| C | 0.90706400  | 3.45304700  | 1.36007900  |
| C | 2.08648000  | 2.51155800  | 1.13821700  |
| H | 5.40763000  | -2.18156600 | -1.06904500 |
| H | 3.11278300  | -2.26874500 | -2.07081800 |
| H | 4.20585100  | 1.17044400  | 1.32660300  |
| H | 5.91451400  | -0.44751800 | 0.65434600  |
| H | 0.77216200  | 4.07449100  | -0.71431200 |
| H | 0.23566900  | 3.04358800  | 2.12431000  |
| H | 2.46896900  | 2.15506900  | 2.10197200  |
| N | 1.10189300  | -0.69784200 | -1.48418200 |
| N | 1.69515900  | 1.34613900  | 0.32907600  |
| N | -0.33739800 | 2.31565100  | -0.43176500 |
| O | 0.87253900  | -1.53122700 | -2.42792600 |
| C | -0.33800800 | -0.96810100 | 0.50872700  |
| C | -0.90919000 | -0.41596000 | 1.66264000  |
| C | -0.08619100 | -2.34575500 | 0.47429400  |
| C | -1.20922400 | -1.21995100 | 2.76195400  |
| H | -1.14129100 | 0.64380700  | 1.69380000  |
| C | -0.38805800 | -3.14914100 | 1.57501000  |
| H | 0.34317100  | -2.79446800 | -0.41565800 |
| C | -0.94633200 | -2.58977700 | 2.72450200  |
| H | -1.65402700 | -0.77292500 | 3.64717600  |
| H | -0.18240600 | -4.21544600 | 1.53066400  |
| H | -1.17795800 | -3.21588600 | 3.58203800  |
| H | 2.90787600  | 3.03587700  | 0.63089300  |
| H | 1.27851900  | 4.41425400  | 1.73202600  |
| H | -0.73475100 | 4.26421400  | 0.18137400  |
| C | -1.26403800 | -0.00128900 | -1.69660900 |
| H | -1.09847300 | 0.85802600  | -2.35100500 |
| H | -1.18908200 | -0.89945600 | -2.31212900 |
| C | -2.65789600 | 0.06207100  | -1.09893300 |
| C | -3.31348300 | 1.28144300  | -0.87948200 |
| C | -3.35597800 | -1.12339100 | -0.82475700 |
| C | -4.61974700 | 1.31391000  | -0.38858600 |
| H | -2.78219000 | 2.20346300  | -1.08728400 |
| C | -4.65913700 | -1.09504400 | -0.32808000 |

|   |             |             |             |
|---|-------------|-------------|-------------|
| H | -2.87055200 | -2.07997700 | -1.00113800 |
| C | -5.29726700 | 0.12643200  | -0.10732100 |
| H | -5.11073200 | 2.27117900  | -0.22976500 |
| H | -5.17781200 | -2.02788500 | -0.12139400 |
| H | -6.31516300 | 0.15210600  | 0.27363900  |

|                                              |                             |
|----------------------------------------------|-----------------------------|
| Zero-point correction=                       | 0.413106 (Hartree/Particle) |
| Thermal correction to Energy=                | 0.434876                    |
| Thermal correction to Enthalpy=              | 0.435820                    |
| Thermal correction to Gibbs Free Energy=     | 0.361863                    |
| Sum of electronic and zero-point Energies=   | -1166.379664                |
| Sum of electronic and thermal Energies=      | -1166.357894                |
| Sum of electronic and thermal Enthalpies=    | -1166.356949                |
| Sum of electronic and thermal Free Energies= | -1166.430907                |

**1a,anti**

|   |             |             |             |
|---|-------------|-------------|-------------|
| C | -2.80636100 | -3.02980300 | 1.77756100  |
| C | -1.57149100 | -2.39716400 | 1.71075000  |
| C | -1.41224000 | -1.23046700 | 0.94861800  |
| C | -2.50335800 | -0.68166700 | 0.23473900  |
| C | -3.74283300 | -1.33377800 | 0.32348100  |
| C | -3.89265600 | -2.49469000 | 1.08328000  |
| C | -1.13818500 | 1.22284600  | -0.49101800 |
| C | 0.14945900  | 0.47626000  | -0.06027800 |
| C | -2.14922000 | 3.11919800  | -1.44954200 |
| C | -3.08976700 | 2.16246100  | -2.17881700 |
| C | -3.49565000 | 1.03781300  | -1.23330900 |
| H | -2.91920800 | -3.93380200 | 2.36839000  |
| H | -0.70232400 | -2.77478800 | 2.23412100  |
| H | -4.60800600 | -0.93322400 | -0.18883700 |
| H | -4.86665300 | -2.97298600 | 1.13068600  |
| H | -2.67968500 | 3.62092100  | -0.62532800 |
| H | -2.57176200 | 1.74660600  | -3.05171600 |
| H | -3.95687800 | 0.22227200  | -1.80069900 |
| N | -0.16244800 | -0.60223200 | 0.91573500  |
| N | -2.33184600 | 0.49399600  | -0.51323200 |
| N | -0.99039200 | 2.41864600  | -0.91701100 |
| O | 0.81730300  | -1.10883000 | 1.56669000  |
| C | 1.12010700  | 1.47649100  | 0.58830000  |
| C | 1.10584600  | 1.68490700  | 1.97423400  |
| C | 1.96708400  | 2.27579900  | -0.18789300 |
| C | 1.93046500  | 2.64173000  | 2.56445900  |
| H | 0.46102300  | 1.08710100  | 2.60702500  |
| C | 2.79750800  | 3.23049600  | 0.40059700  |
| H | 1.97036300  | 2.18262500  | -1.26729000 |
| C | 2.78653100  | 3.41639100  | 1.78192200  |
| H | 1.90383800  | 2.77579200  | 3.64271700  |
| H | 3.44609000  | 3.83449200  | -0.22860700 |

|   |             |             |             |
|---|-------------|-------------|-------------|
| H | 3.43329800  | 4.15840500  | 2.24269600  |
| H | -4.23802900 | 1.39446900  | -0.50561700 |
| H | -3.99034000 | 2.66967500  | -2.54241200 |
| H | -1.79448800 | 3.91042000  | -2.11911600 |
| C | 0.69147700  | -0.22104700 | -1.36966700 |
| H | -0.17131700 | -0.71828900 | -1.82787800 |
| H | 0.98287400  | 0.57546500  | -2.05934600 |
| C | 1.80447600  | -1.23625500 | -1.21329300 |
| C | 1.49676000  | -2.60331800 | -1.16743500 |
| C | 3.15346900  | -0.85785000 | -1.16381100 |
| C | 2.50121500  | -3.56498200 | -1.06349900 |
| H | 0.45648300  | -2.91786600 | -1.21348700 |
| C | 4.16073300  | -1.81657200 | -1.05936000 |
| H | 3.41983600  | 0.19380700  | -1.19937700 |
| C | 3.83930400  | -3.17399800 | -1.00805300 |
| H | 2.23748700  | -4.61893700 | -1.02920000 |
| H | 5.20018100  | -1.50090200 | -1.02090200 |
| H | 4.62555200  | -3.92028300 | -0.92958600 |

|                                              |                             |
|----------------------------------------------|-----------------------------|
| Zero-point correction=                       | 0.412801 (Hartree/Particle) |
| Thermal correction to Energy=                | 0.434578                    |
| Thermal correction to Enthalpy=              | 0.435522                    |
| Thermal correction to Gibbs Free Energy=     | 0.361556                    |
| Sum of electronic and zero-point Energies=   | -1166.370982                |
| Sum of electronic and thermal Energies=      | -1166.349205                |
| Sum of electronic and thermal Enthalpies=    | -1166.348261                |
| Sum of electronic and thermal Free Energies= | -1166.422227                |

### **1b,syn**

|   |             |             |             |
|---|-------------|-------------|-------------|
| C | 4.13705300  | -1.22693100 | -0.81552600 |
| C | 2.84851900  | -1.37508400 | -1.31356100 |
| C | 1.82169500  | -0.53003500 | -0.87364900 |
| C | 2.08209000  | 0.49869100  | 0.06069100  |
| C | 3.38783500  | 0.62460900  | 0.55847200  |
| C | 4.40123000  | -0.23088800 | 0.12730900  |
| C | -0.21346300 | 1.27385000  | -0.16012000 |
| C | -0.62937800 | -0.15876700 | -0.57103200 |
| C | -0.67888700 | 3.54623000  | 0.20780300  |
| C | 0.16646400  | 3.43532000  | 1.47658900  |
| C | 1.40283100  | 2.58875800  | 1.18919100  |
| H | 4.92763000  | -1.88897500 | -1.15507100 |
| H | 2.59951400  | -2.13670600 | -2.04182400 |
| H | 3.62540400  | 1.40043300  | 1.27528800  |
| H | 5.40273000  | -0.10788400 | 0.52923600  |
| H | -0.12019400 | 4.07878700  | -0.57746400 |
| H | -0.43479900 | 2.96776000  | 2.26517500  |
| H | 1.86369000  | 2.26644500  | 2.13012400  |
| N | 0.51804800  | -0.69909100 | -1.37373000 |

|   |             |             |             |
|---|-------------|-------------|-------------|
| N | 1.06130600  | 1.39113300  | 0.40378000  |
| N | -1.05279100 | 2.22627100  | -0.27956200 |
| O | 0.32227300  | -1.54716400 | -2.31331400 |
| C | -0.79094300 | -1.02005800 | 0.70406400  |
| C | -1.42862200 | -0.49253700 | 1.83572600  |
| C | -0.33713900 | -2.34546800 | 0.74088600  |
| C | -1.60371200 | -1.27322900 | 2.97859400  |
| H | -1.80717200 | 0.52372200  | 1.81915000  |
| C | -0.51118800 | -3.12251600 | 1.88649100  |
| H | 0.14404300  | -2.77824400 | -0.12972300 |
| C | -1.14219900 | -2.58931500 | 3.01060900  |
| H | -2.10536500 | -0.84814600 | 3.84365900  |
| H | -0.15157200 | -4.14790300 | 1.89584000  |
| H | -1.27620300 | -3.19523000 | 3.90260000  |
| H | 2.15120500  | 3.17378400  | 0.63719000  |
| H | 0.48113500  | 4.41812400  | 1.84394500  |
| H | -1.59622200 | 4.11522800  | 0.38838400  |
| C | -1.96762800 | -0.16321500 | -1.44341100 |
| C | -1.79189200 | 0.57087300  | -2.79741600 |
| C | -2.52082300 | -1.59596300 | -1.70386100 |
| H | -1.05923200 | 0.04200900  | -3.40922200 |
| H | -2.74954800 | 0.57440100  | -3.32701600 |
| H | -1.47958000 | 1.60487300  | -2.64918400 |
| H | -3.46681600 | -1.50298700 | -2.24576500 |
| H | -1.81808700 | -2.17201600 | -2.30235200 |
| H | -2.72191300 | -2.12417200 | -0.76948100 |
| C | -3.05458500 | 0.50006400  | -0.68437800 |
| N | -4.01947300 | 0.88564100  | -0.16446200 |

|                                              |                             |
|----------------------------------------------|-----------------------------|
| Zero-point correction=                       | 0.386104 (Hartree/Particle) |
| Thermal correction to Energy=                | 0.407827                    |
| Thermal correction to Enthalpy=              | 0.408771                    |
| Thermal correction to Gibbs Free Energy=     | 0.336897                    |
| Sum of electronic and zero-point Energies=   | -1106.240977                |
| Sum of electronic and thermal Energies=      | -1106.219254                |
| Sum of electronic and thermal Enthalpies=    | -1106.218310                |
| Sum of electronic and thermal Free Energies= | -1106.290184                |

### **1b,anti**

|   |             |             |             |
|---|-------------|-------------|-------------|
| C | 3.96454900  | -2.28677800 | -0.08706900 |
| C | 2.62379800  | -2.35043400 | 0.26881500  |
| C | 1.79662100  | -1.22689900 | 0.11785800  |
| C | 2.31476600  | -0.01534600 | -0.39363400 |
| C | 3.67113600  | 0.02484700  | -0.75049900 |
| C | 4.48667300  | -1.09634800 | -0.59728700 |
| C | 0.08036200  | 0.97293600  | -0.45203800 |
| C | -0.52267000 | -0.20359200 | 0.36426100  |
| C | -0.29474700 | 3.02563600  | -1.55894600 |



|   |             |             |             |
|---|-------------|-------------|-------------|
| C | 1.03637500  | 3.48819900  | -0.97129600 |
| C | 2.04442000  | 2.34809900  | -1.05567100 |
| H | 4.59702600  | -3.16107100 | 0.03220200  |
| H | 2.18051800  | -3.25205000 | 0.67147600  |
| H | 4.09924700  | 0.93059600  | -1.16008600 |
| H | 5.53218800  | -1.03258500 | -0.88428000 |
| H | -0.20090100 | 2.84828000  | -2.64118600 |
| H | 0.88281800  | 3.77654800  | 0.07529500  |
| H | 2.93686400  | 2.58447800  | -0.46632600 |
| N | 0.45315300  | -1.31853300 | 0.50029200  |
| N | 1.47361000  | 1.09528300  | -0.53129500 |
| N | -0.76191000 | 1.80736300  | -0.91811000 |
| O | 0.03598700  | -2.39746800 | 1.05554000  |
| C | -1.76692200 | -0.73160100 | -0.38404900 |
| C | -2.99072100 | -0.04915600 | -0.33283700 |
| C | -1.67415400 | -1.86509600 | -1.20266900 |
| C | -4.09295400 | -0.50363300 | -1.05632300 |
| H | -3.08953700 | 0.85484800  | 0.25399600  |
| C | -2.77541800 | -2.31316000 | -1.93363400 |
| H | -0.74673200 | -2.42070100 | -1.26858200 |
| C | -3.99261600 | -1.63866300 | -1.86061300 |
| H | -5.03066800 | 0.04190400  | -0.99291800 |
| H | -2.67535500 | -3.19780000 | -2.55694100 |
| H | -4.85204100 | -1.99117000 | -2.42473400 |
| H | 2.36452200  | 2.19598300  | -2.09628100 |
| H | 1.43482600  | 4.36088300  | -1.50030100 |
| H | -1.06776600 | 3.79048600  | -1.43100500 |
| C | -0.82679000 | 0.30757800  | 1.87720800  |
| C | -1.44740000 | 1.64820600  | 1.88192100  |
| N | -1.91697000 | 2.70163600  | 2.02301500  |
| C | -1.77227800 | -0.64529100 | 2.65419000  |
| H | -1.91045400 | -0.25777200 | 3.66883400  |
| H | -2.75029800 | -0.72410700 | 2.17815600  |
| H | -1.32844500 | -1.63959100 | 2.70184400  |
| C | 0.49729100  | 0.44830700  | 2.67630400  |
| H | 0.94882900  | -0.53490400 | 2.82825400  |
| H | 1.21495000  | 1.09906300  | 2.16989400  |
| H | 0.28138800  | 0.88134500  | 3.65712000  |

|                                              |                             |
|----------------------------------------------|-----------------------------|
| Zero-point correction=                       | 0.386326 (Hartree/Particle) |
| Thermal correction to Energy=                | 0.407953                    |
| Thermal correction to Enthalpy=              | 0.408897                    |
| Thermal correction to Gibbs Free Energy=     | 0.336905                    |
| Sum of electronic and zero-point Energies=   | -1106.235813                |
| Sum of electronic and thermal Energies=      | -1106.214185                |
| Sum of electronic and thermal Enthalpies=    | -1106.213241                |
| Sum of electronic and thermal Free Energies= | -1106.285233                |

**1c,anti(N-O)**

|   |             |             |             |
|---|-------------|-------------|-------------|
| C | 2.97191000  | -2.77879300 | -0.27875400 |
| C | 1.93652000  | -2.47336100 | 0.59518100  |
| C | 1.32288700  | -1.21416500 | 0.54142000  |
| C | 1.76613400  | -0.21964300 | -0.36442500 |
| C | 2.78619200  | -0.56762100 | -1.26287900 |
| C | 3.38252900  | -1.82840700 | -1.21757400 |
| C | 0.05393600  | 1.36720900  | 0.41309500  |
| C | -0.70148500 | 0.18391200  | 1.04504800  |
| C | 0.14592300  | 3.68142500  | -0.05664600 |
| C | 1.64149800  | 3.49436800  | -0.29741000 |
| C | 1.88510600  | 2.17049300  | -1.01937200 |
| H | 3.44394300  | -3.75564000 | -0.23977700 |
| H | 1.57104900  | -3.18322000 | 1.32753800  |
| H | 3.11805200  | 0.14265500  | -2.01017100 |
| H | 4.17234300  | -2.06354600 | -1.92501300 |
| H | -0.37159400 | 3.89969100  | -1.00330600 |
| H | 2.16897400  | 3.48154400  | 0.66402900  |
| H | 2.95580800  | 1.95557800  | -1.04157200 |
| N | 0.25678600  | -0.91322700 | 1.38237300  |
| N | 1.21092700  | 1.06656400  | -0.31728000 |
| N | -0.48056800 | 2.51701300  | 0.54878700  |
| O | -0.12794500 | -1.72166000 | 2.30143000  |
| C | -1.79006400 | -0.34080600 | 0.08284200  |
| C | -2.84286500 | 0.52992000  | -0.23588500 |
| C | -1.79662600 | -1.63895400 | -0.43580500 |
| C | -3.87477500 | 0.10961800  | -1.07131400 |
| H | -2.83645300 | 1.53189500  | 0.17978100  |
| C | -2.83445400 | -2.05710500 | -1.27359200 |
| H | -1.00813300 | -2.33887800 | -0.18284200 |
| C | -3.87287700 | -1.18578000 | -1.59643900 |
| H | -4.68507200 | 0.79362500  | -1.31014200 |
| H | -2.82807400 | -3.07004200 | -1.66738100 |
| H | -4.67892100 | -1.51327800 | -2.24783800 |
| H | 1.53052700  | 2.22185700  | -2.05838800 |
| H | 2.05917900  | 4.31502200  | -0.89161200 |
| H | -0.03691600 | 4.54207200  | 0.59714600  |
| O | -1.26368800 | 0.61755300  | 2.24489800  |
| H | -1.42858900 | -0.21277600 | 2.73682300  |

|                                              |                             |
|----------------------------------------------|-----------------------------|
| Zero-point correction=                       | 0.307643 (Hartree/Particle) |
| Thermal correction to Energy=                | 0.324449                    |
| Thermal correction to Enthalpy=              | 0.325393                    |
| Thermal correction to Gibbs Free Energy=     | 0.263083                    |
| Sum of electronic and zero-point Energies=   | -971.418524                 |
| Sum of electronic and thermal Energies=      | -971.401717                 |
| Sum of electronic and thermal Enthalpies=    | -971.400773                 |
| Sum of electronic and thermal Free Energies= | -971.463083                 |

**1c,syn(amid)**

|   |             |             |             |
|---|-------------|-------------|-------------|
| C | -3.16806700 | -2.48892200 | -0.37082500 |
| C | -2.14868000 | -2.28463600 | 0.55159000  |
| C | -1.40031100 | -1.10087600 | 0.52620900  |
| C | -1.68643000 | -0.09023600 | -0.42437800 |
| C | -2.71197300 | -0.31964300 | -1.34985300 |
| C | -3.44292100 | -1.50874000 | -1.32631100 |
| C | -0.01229900 | 1.33902900  | 0.58060700  |
| C | 0.70314400  | 0.09457200  | 1.14215200  |
| C | -0.22820700 | 3.67369300  | 0.50514200  |
| C | -0.58101800 | 3.49786100  | -0.97360100 |
| C | -1.48445800 | 2.27913000  | -1.15470200 |
| H | -3.74017300 | -3.41151700 | -0.34799200 |
| H | -1.89929700 | -3.01923000 | 1.30766500  |
| H | -2.95844100 | 0.43331700  | -2.08836700 |
| H | -4.23335700 | -1.65851900 | -2.05582400 |
| H | -1.13314700 | 3.89770400  | 1.09047100  |
| H | 0.34447300  | 3.36203200  | -1.54574300 |
| H | -1.51232100 | 1.99198000  | -2.21156000 |
| N | -0.36393200 | -0.91095700 | 1.45203300  |
| N | -0.99124700 | 1.13416300  | -0.37118400 |
| N | 0.39996400  | 2.46707200  | 1.02960200  |
| O | -0.13945600 | -1.76845100 | 2.36884000  |
| C | 1.69721400  | -0.48682800 | 0.11785800  |
| C | 2.62057100  | 0.37917900  | -0.48366900 |
| C | 1.75400400  | -1.85237100 | -0.17415300 |
| C | 3.57052300  | -0.11022200 | -1.37755100 |
| H | 2.59863300  | 1.43702800  | -0.23840600 |
| C | 2.70977900  | -2.34181400 | -1.06773100 |
| H | 1.06951600  | -2.54122900 | 0.30807800  |
| C | 3.61571800  | -1.47426400 | -1.67604400 |
| H | 4.27971400  | 0.57316900  | -1.83751300 |
| H | 2.74489200  | -3.40651200 | -1.28261700 |
| H | 4.35675500  | -1.85700400 | -2.37281900 |
| H | -2.51381800 | 2.50505600  | -0.84521300 |
| H | -1.08822300 | 4.38173500  | -1.37517600 |
| H | 0.45835400  | 4.51410900  | 0.64872200  |
| O | 1.36742100  | 0.43447800  | 2.30838900  |
| H | 1.24969400  | 1.40825300  | 2.38687100  |

|                                              |                             |
|----------------------------------------------|-----------------------------|
| Zero-point correction=                       | 0.308062 (Hartree/Particle) |
| Thermal correction to Energy=                | 0.324799                    |
| Thermal correction to Enthalpy=              | 0.325744                    |
| Thermal correction to Gibbs Free Energy=     | 0.263533                    |
| Sum of electronic and zero-point Energies=   | -971.421657                 |
| Sum of electronic and thermal Energies=      | -971.404920                 |
| Sum of electronic and thermal Enthalpies=    | -971.403976                 |
| Sum of electronic and thermal Free Energies= | -971.466186                 |

**1c,syn(N-O)**

|   |             |             |             |
|---|-------------|-------------|-------------|
| C | 0.01205935  | -0.03223104 | 0.04033062  |
| C | 0.01287627  | 0.01225506  | 1.42808789  |
| C | 1.22631563  | 0.01255049  | 2.13157924  |
| C | 2.46935942  | -0.01548626 | 1.44847334  |
| C | 2.43891555  | -0.06496476 | 0.04643971  |
| C | 1.22780047  | -0.07601208 | -0.64684560 |
| C | 3.69295318  | 0.23767603  | 3.55578229  |
| C | 2.45128848  | -0.24184595 | 4.32109878  |
| C | 5.89933085  | 1.01464520  | 3.53036827  |
| C | 6.13684180  | 0.06250819  | 2.35812344  |
| C | 4.93639831  | 0.10740116  | 1.41799257  |
| H | -0.92878308 | -0.03630378 | -0.50129858 |
| H | -0.90373718 | 0.04500728  | 2.00433438  |
| H | 3.36257861  | -0.08102290 | -0.51755760 |
| H | 1.24275106  | -0.11246497 | -1.73223156 |
| H | 5.83013206  | 2.05324714  | 3.17163312  |
| H | 6.26816791  | -0.95412690 | 2.74756735  |
| H | 4.96866282  | -0.74129508 | 0.72525193  |
| N | 1.22150774  | 0.04277166  | 3.52123302  |
| N | 3.67047548  | 0.04646080  | 2.16746275  |
| N | 4.67681419  | 0.66695924  | 4.24314772  |
| O | 0.13186215  | 0.11538704  | 4.19439246  |
| C | 2.56412544  | -1.75552124 | 4.60060667  |
| C | 3.56095779  | -2.17036324 | 5.49550425  |
| C | 1.71541518  | -2.70778289 | 4.03003345  |
| C | 3.70873387  | -3.52003848 | 5.80575026  |
| H | 4.20858819  | -1.42230076 | 5.94113359  |
| C | 1.86616753  | -4.06137458 | 4.34443019  |
| H | 0.92407268  | -2.40486933 | 3.35292714  |
| C | 2.86228110  | -4.47130888 | 5.22880759  |
| H | 4.48298360  | -3.83039801 | 6.50264489  |
| H | 1.19678594  | -4.79213181 | 3.89829677  |
| H | 2.97695217  | -5.52421258 | 5.47269802  |
| H | 4.95347463  | 1.02708231  | 0.81674788  |
| H | 7.04176432  | 0.32050283  | 1.79694359  |
| H | 6.73226403  | 0.98192248  | 4.24049868  |
| O | 2.34667175  | 0.48156308  | 5.50617822  |
| H | 1.40645430  | 0.37687269  | 5.75875346  |

Zero-point correction= 0.307582 (Hartree/Particle)

Thermal correction to Energy= 0.324433

Thermal correction to Enthalpy= 0.325377

Thermal correction to Gibbs Free Energy= 0.262570

Sum of electronic and zero-point Energies= -971.420226

Sum of electronic and thermal Energies= -971.403375

Sum of electronic and thermal Enthalpies= -971.402431

Sum of electronic and thermal Free Energies= -971.465238

**1c,anti(amid)**

|   |             |             |             |
|---|-------------|-------------|-------------|
| C | -0.16701391 | -0.03648581 | 0.95291416  |
| C | 0.24092148  | -0.80063725 | 2.04013689  |
| C | 1.54166187  | -0.67134937 | 2.54048359  |
| C | 2.46243831  | 0.21220081  | 1.93050166  |
| C | 2.02216091  | 0.99917434  | 0.85983416  |
| C | 0.72031214  | 0.87290279  | 0.37243248  |
| C | 4.15973877  | -0.33884276 | 3.58509745  |
| C | 3.04145068  | -0.84421095 | 4.51774932  |
| C | 6.48796484  | -0.08672000 | 3.23416764  |
| C | 6.16008885  | -0.00605474 | 1.74269002  |
| C | 4.86657435  | 0.78276166  | 1.52982311  |
| H | -1.17878599 | -0.13647127 | 0.57168326  |
| H | -0.42009320 | -1.50271170 | 2.53387298  |
| H | 2.69163482  | 1.71929351  | 0.40315948  |
| H | 0.40432131  | 1.49252406  | -0.46162577 |
| H | 6.82886139  | 0.89049907  | 3.60721105  |
| H | 6.03156881  | -1.01816584 | 1.34054316  |
| H | 4.54247549  | 0.69438947  | 0.49091395  |
| N | 1.95184553  | -1.41875662 | 3.65332356  |
| N | 3.79603891  | 0.25161193  | 2.39051171  |
| N | 5.34789672  | -0.51305700 | 4.03319215  |
| O | 1.20716486  | -2.32918058 | 4.14279453  |
| C | 2.42586773  | 0.25655404  | 5.39521495  |
| C | 1.62168913  | -0.15025754 | 6.46960981  |
| C | 2.62178699  | 1.62135947  | 5.16664340  |
| C | 1.02393322  | 0.79736287  | 7.29660352  |
| H | 1.47604673  | -1.21031479 | 6.64565561  |
| C | 2.02667730  | 2.57012960  | 6.00247811  |
| H | 3.24360793  | 1.95729583  | 4.34246827  |
| C | 1.22560410  | 2.16156638  | 7.06717705  |
| H | 0.40243192  | 0.47081028  | 8.12627847  |
| H | 2.19333084  | 3.62822343  | 5.81796979  |
| H | 0.76203338  | 2.89946784  | 7.71664259  |
| H | 5.02089893  | 1.84904357  | 1.74430999  |
| H | 6.97338805  | 0.46977712  | 1.18374674  |
| H | 7.31143740  | -0.78745814 | 3.41139966  |
| O | 3.54230342  | -1.87550638 | 5.30030319  |
| H | 4.51747028  | -1.74880634 | 5.25698278  |

Zero-point correction= 0.307613 (Hartree/Particle)

Thermal correction to Energy= 0.324463

Thermal correction to Enthalpy= 0.325407

Thermal correction to Gibbs Free Energy= 0.262868

Sum of electronic and zero-point Energies= -971.421004

Sum of electronic and thermal Energies= -971.404153

Sum of electronic and thermal Enthalpies= -971.403209

Sum of electronic and thermal Free Energies= -971.465748

**1d,syn**

|   |             |             |             |
|---|-------------|-------------|-------------|
| C | 3.54283300  | -3.02752400 | -0.19496500 |
| C | 2.17469300  | -2.80928900 | -0.29955100 |
| C | 1.67281600  | -1.50415600 | -0.38944500 |
| C | 2.54618100  | -0.39104000 | -0.39678800 |
| C | 3.92307200  | -0.63498000 | -0.28400400 |
| C | 4.41457100  | -1.93698200 | -0.18062300 |
| C | 0.66399900  | 1.13099900  | -0.76140500 |
| C | -0.28954700 | 0.05468400  | -0.18698000 |
| C | 1.05051500  | 3.22325700  | -1.72883700 |
| C | 2.23958700  | 3.35935100  | -0.77792600 |
| C | 2.97224000  | 2.02430900  | -0.69501800 |
| H | 3.92512500  | -4.04100600 | -0.11980800 |
| H | 1.46093600  | -3.62373900 | -0.31249900 |
| H | 4.62560900  | 0.18844800  | -0.29053400 |
| H | 5.48638800  | -2.09132600 | -0.09642400 |
| H | 1.40169000  | 2.98778300  | -2.74561500 |
| H | 1.86995700  | 3.64624800  | 0.21380400  |
| H | 3.63980300  | 2.01580500  | 0.17420300  |
| N | 0.29067200  | -1.29860300 | -0.48140400 |
| N | 2.02843000  | 0.90133500  | -0.56591400 |
| N | 0.14267800  | 2.17754100  | -1.27462000 |
| O | -0.50586200 | -2.29383200 | -0.55642500 |
| C | -0.46080900 | 0.26051100  | 1.32733000  |
| C | -0.85482200 | 1.52338100  | 1.78936800  |
| C | -0.25362100 | -0.77257700 | 2.24465100  |
| C | -1.02403200 | 1.75051400  | 3.15331000  |
| H | -1.03595700 | 2.31596500  | 1.07033400  |
| C | -0.41998200 | -0.53980300 | 3.61174500  |
| H | 0.01668500  | -1.76376400 | 1.89911100  |
| C | -0.80087000 | 0.72040700  | 4.07050700  |
| H | -1.33304500 | 2.73308400  | 3.50051700  |
| H | -0.25571500 | -1.35099700 | 4.31598100  |
| H | -0.92920300 | 0.89903600  | 5.13489100  |
| H | 3.59101700  | 1.86864100  | -1.58943500 |
| H | 2.94107500  | 4.13459900  | -1.10532200 |
| H | 0.48871600  | 4.16058000  | -1.79787000 |
| O | -1.47832900 | 0.21403600  | -0.90302900 |
| O | -2.58467900 | -0.36529200 | -0.12069500 |
| C | -3.69525500 | -0.53090800 | -1.03085500 |
| C | -4.14905300 | 0.83581200  | -1.56042700 |
| C | -3.33624800 | -1.49628400 | -2.16614900 |
| C | -4.74916300 | -1.14305200 | -0.09782400 |
| H | -4.41025000 | 1.49927300  | -0.72909700 |
| H | -3.35286000 | 1.30966400  | -2.14044700 |
| H | -5.02877900 | 0.72174600  | -2.20433100 |
| H | -2.94518800 | -2.43179200 | -1.75852600 |
| H | -4.22546400 | -1.71048500 | -2.77042800 |
| H | -2.57258400 | -1.06453100 | -2.81766200 |
| H | -5.67864700 | -1.30733000 | -0.65305500 |

|   |             |             |            |
|---|-------------|-------------|------------|
| H | -4.40375500 | -2.10309100 | 0.29783700 |
| H | -4.95968100 | -0.47378700 | 0.74245600 |

|                                              |                             |
|----------------------------------------------|-----------------------------|
| Zero-point correction=                       | 0.422356 (Hartree/Particle) |
| Thermal correction to Energy=                | 0.446208                    |
| Thermal correction to Enthalpy=              | 0.447152                    |
| Thermal correction to Gibbs Free Energy=     | 0.369406                    |
| Sum of electronic and zero-point Energies=   | -1203.585085                |
| Sum of electronic and thermal Energies=      | -1203.561233                |
| Sum of electronic and thermal Enthalpies=    | -1203.560289                |
| Sum of electronic and thermal Free Energies= | -1203.638035                |

**1d,anti**

|   |             |             |             |
|---|-------------|-------------|-------------|
| C | -3.66983400 | -2.25223900 | -1.72603100 |
| C | -2.28004100 | -2.27003600 | -1.74604100 |
| C | -1.55364500 | -1.54354600 | -0.79701900 |
| C | -2.21102800 | -0.79366200 | 0.20732400  |
| C | -3.61487300 | -0.78322900 | 0.20254100  |
| C | -4.33327600 | -1.50180400 | -0.75337900 |
| C | -0.06722800 | -0.20919600 | 1.21826600  |
| C | 0.59212600  | -0.47267200 | -0.14599900 |
| C | 0.01721400  | 0.31328800  | 3.49192800  |
| C | -1.19764000 | 1.20990200  | 3.24991700  |
| C | -2.17286800 | 0.50060400  | 2.31482400  |
| H | -4.22960700 | -2.81393100 | -2.46758300 |
| H | -1.72192600 | -2.83204100 | -2.48490300 |
| H | -4.15805800 | -0.22664700 | 0.95576300  |
| H | -5.41889600 | -1.47528100 | -0.72704700 |
| H | -0.29109100 | -0.61685000 | 3.99529700  |
| H | -0.85521600 | 2.14584600  | 2.79313600  |
| H | -2.89268700 | 1.21988000  | 1.90604000  |
| N | -0.14798100 | -1.56812600 | -0.82841600 |
| N | -1.46423900 | -0.14104600 | 1.19640000  |
| N | 0.67840500  | -0.00983900 | 2.23486300  |
| O | 0.47398900  | -2.34543100 | -1.62740000 |
| C | 2.06805200  | -0.82418500 | -0.06095000 |
| C | 3.01033100  | -0.10084100 | -0.79122000 |
| C | 2.48811300  | -1.91126300 | 0.71506900  |
| C | 4.36176600  | -0.44956600 | -0.73619900 |
| H | 2.68802500  | 0.73610500  | -1.39725300 |
| C | 3.83362000  | -2.26303700 | 0.76358900  |
| H | 1.76142300  | -2.48443100 | 1.28159900  |
| C | 4.77751900  | -1.52978100 | 0.03950700  |
| H | 5.08711800  | 0.12492500  | -1.30648900 |
| H | 4.14656200  | -3.11040000 | 1.36786900  |
| H | 5.82885000  | -1.80297400 | 0.07986000  |
| H | -2.74477000 | -0.26284900 | 2.86031000  |
| H | -1.71308900 | 1.46410600  | 4.18266800  |

|   |             |            |             |
|---|-------------|------------|-------------|
| H | 0.74521900  | 0.80155200 | 4.14802600  |
| O | 0.31885300  | 0.62547500 | -1.03335100 |
| O | 0.67115300  | 1.88073400 | -0.33441200 |
| C | 0.09162800  | 2.96928800 | -1.09266300 |
| C | 0.66956200  | 3.00124700 | -2.51314800 |
| C | -1.43783400 | 2.86582400 | -1.10550900 |
| C | 0.55996900  | 4.18427800 | -0.28053400 |
| H | 1.76220900  | 3.06631300 | -2.47922300 |
| H | 0.39251200  | 2.10181400 | -3.06887200 |
| H | 0.28957200  | 3.87322200 | -3.05721700 |
| H | -1.82669500 | 2.83769200 | -0.08203100 |
| H | -1.87210100 | 3.73326700 | -1.61493300 |
| H | -1.76451100 | 1.96158100 | -1.62449600 |
| H | 0.19988900  | 5.10401600 | -0.75339900 |
| H | 0.16966200  | 4.14434800 | 0.74159700  |
| H | 1.65255700  | 4.22135500 | -0.23299200 |

|                                              |                             |
|----------------------------------------------|-----------------------------|
| Zero-point correction=                       | 0.422390 (Hartree/Particle) |
| Thermal correction to Energy=                | 0.446126                    |
| Thermal correction to Enthalpy=              | 0.447070                    |
| Thermal correction to Gibbs Free Energy=     | 0.370001                    |
| Sum of electronic and zero-point Energies=   | -1203.587900                |
| Sum of electronic and thermal Energies=      | -1203.564164                |
| Sum of electronic and thermal Enthalpies=    | -1203.563220                |
| Sum of electronic and thermal Free Energies= | -1203.640289                |

### 1e,syn(N-O)

|   |             |             |             |
|---|-------------|-------------|-------------|
| C | -3.65967400 | -2.12108500 | -0.40818400 |
| C | -2.47067200 | -2.18689600 | 0.30512400  |
| C | -1.61613100 | -1.07538800 | 0.35413600  |
| C | -1.95244900 | 0.13349400  | -0.30354000 |
| C | -3.15808600 | 0.17220300  | -1.02120900 |
| C | -3.99747500 | -0.94054200 | -1.07487600 |
| C | 0.01809900  | 1.25041900  | 0.63005900  |
| C | 0.65680200  | -0.12657100 | 0.91517200  |
| C | 0.09654000  | 3.58839400  | 0.71850700  |
| C | -0.46068800 | 3.58261100  | -0.70461700 |
| C | -1.54136700 | 2.51270800  | -0.81980200 |
| H | -4.31614500 | -2.98474700 | -0.44776100 |
| H | -2.16723300 | -3.08111700 | 0.83513200  |
| H | -3.45914700 | 1.07721100  | -1.53266700 |
| H | -4.92381600 | -0.87496500 | -1.63800800 |
| H | -0.68868000 | 3.86974800  | 1.43689800  |
| H | 0.35509000  | 3.36769300  | -1.40503800 |
| H | -1.76240100 | 2.31313800  | -1.87432300 |
| N | -0.41840100 | -1.15641800 | 1.06238100  |
| N | -1.11582900 | 1.25007000  | -0.19119500 |
| N | 0.62675000  | 2.27869100  | 1.07341900  |



|   |             |             |             |
|---|-------------|-------------|-------------|
| O | -0.12246800 | -2.22419800 | 1.71654400  |
| C | 1.62743300  | -0.49844700 | -0.21400800 |
| C | 2.73937500  | 0.32929100  | -0.42001000 |
| C | 1.43490300  | -1.61162900 | -1.03527400 |
| C | 3.64262400  | 0.04536000  | -1.44067100 |
| H | 2.88592700  | 1.18418800  | 0.23162300  |
| C | 2.34151000  | -1.88999500 | -2.06165800 |
| H | 0.59343000  | -2.27617200 | -0.87344800 |
| C | 3.44411500  | -1.06327300 | -2.26872800 |
| H | 4.50630200  | 0.68839100  | -1.58788000 |
| H | 2.18357300  | -2.75978700 | -2.69362800 |
| H | 4.14912600  | -1.28251900 | -3.06623800 |
| H | -2.47143700 | 2.85287500  | -0.34403000 |
| H | -0.88640500 | 4.55318900  | -0.98176100 |
| H | 0.90018800  | 4.32403800  | 0.82628700  |
| O | 1.29074000  | 0.01562700  | 2.16570000  |
| O | 2.21060100  | -1.08732400 | 2.38327600  |
| H | 1.55384600  | -1.81433600 | 2.47592200  |

|                                              |                             |
|----------------------------------------------|-----------------------------|
| Zero-point correction=                       | 0.311007 (Hartree/Particle) |
| Thermal correction to Energy=                | 0.328917                    |
| Thermal correction to Enthalpy=              | 0.329861                    |
| Thermal correction to Gibbs Free Energy=     | 0.264455                    |
| Sum of electronic and zero-point Energies=   | -1046.514995                |
| Sum of electronic and thermal Energies=      | -1046.497085                |
| Sum of electronic and thermal Enthalpies=    | -1046.496141                |
| Sum of electronic and thermal Free Energies= | -1046.561547                |

### 1e,syn(amid)

|   |             |             |             |
|---|-------------|-------------|-------------|
| C | -3.64330600 | -2.05324800 | -0.25731700 |
| C | -2.52724600 | -2.00850700 | 0.56910900  |
| C | -1.60748200 | -0.95748000 | 0.45728600  |
| C | -1.80971400 | 0.08037700  | -0.48339500 |
| C | -2.93822200 | 0.01150100  | -1.31143700 |
| C | -3.84333800 | -1.04542400 | -1.20223700 |
| C | 0.13541000  | 1.27006900  | 0.36798800  |
| C | 0.67554400  | -0.05541800 | 0.94366900  |
| C | 0.30589400  | 3.59573800  | 0.08821800  |
| C | -0.13983700 | 3.36610300  | -1.35520700 |
| C | -1.25167300 | 2.32145600  | -1.38384500 |
| H | -4.34934600 | -2.87319000 | -0.16762600 |
| H | -2.33043100 | -2.77076300 | 1.31287100  |
| H | -3.12971600 | 0.78891400  | -2.04026600 |
| H | -4.70922200 | -1.06940300 | -1.85726100 |
| H | -0.52029100 | 4.02114800  | 0.67903300  |
| H | 0.71741000  | 3.01501100  | -1.94188300 |
| H | -1.39718500 | 1.95822800  | -2.40716100 |
| N | -0.47531900 | -0.94152800 | 1.28258300  |

|   |             |             |             |
|---|-------------|-------------|-------------|
| N | -0.92064100 | 1.17102200  | -0.52678200 |
| N | 0.74893000  | 2.34755100  | 0.70081300  |
| O | -0.28094900 | -1.86160500 | 2.14343300  |
| C | 1.62706800  | -0.73285000 | -0.05605600 |
| C | 2.70093000  | 0.00833300  | -0.56808200 |
| C | 1.46921800  | -2.06966000 | -0.43419400 |
| C | 3.59393200  | -0.57763000 | -1.46286500 |
| H | 2.83317100  | 1.03780800  | -0.25213000 |
| C | 2.36445100  | -2.65082700 | -1.33425400 |
| H | 0.66545600  | -2.66473900 | -0.01669700 |
| C | 3.42444500  | -1.90795100 | -1.85334500 |
| H | 4.42525500  | 0.00425800  | -1.85183900 |
| H | 2.23294500  | -3.69008400 | -1.62265300 |
| H | 4.11971100  | -2.36429100 | -2.55293400 |
| H | -2.20264700 | 2.75637800  | -1.04759800 |
| H | -0.50189000 | 4.28921200  | -1.82045700 |
| H | 1.13136100  | 4.31326200  | 0.13764000  |
| O | 1.46960500  | 0.15158600  | 2.07651900  |
| O | 0.73869400  | 0.93718600  | 3.05977600  |
| H | 0.90938500  | 1.82410700  | 2.67061400  |

|                                              |                             |
|----------------------------------------------|-----------------------------|
| Zero-point correction=                       | 0.311907 (Hartree/Particle) |
| Thermal correction to Energy=                | 0.329618                    |
| Thermal correction to Enthalpy=              | 0.330562                    |
| Thermal correction to Gibbs Free Energy=     | 0.266246                    |
| Sum of electronic and zero-point Energies=   | -1046.517638                |
| Sum of electronic and thermal Energies=      | -1046.499926                |
| Sum of electronic and thermal Enthalpies=    | -1046.498982                |
| Sum of electronic and thermal Free Energies= | -1046.563298                |

### 1e,anti(N-O)

|   |             |             |             |
|---|-------------|-------------|-------------|
| C | 2.46239000  | -3.25758000 | -0.23623900 |
| C | 1.50747700  | -2.72431700 | 0.62051800  |
| C | 1.11431000  | -1.38713000 | 0.48374800  |
| C | 1.70722800  | -0.54526300 | -0.48637400 |
| C | 2.64382100  | -1.11489300 | -1.36199900 |
| C | 3.01609600  | -2.45343900 | -1.23635400 |
| C | 0.27364000  | 1.33786700  | 0.16265700  |
| C | -0.67161400 | 0.31956300  | 0.83960300  |
| C | 0.74724700  | 3.57426500  | -0.43116600 |
| C | 2.20008000  | 3.13749200  | -0.60392900 |
| C | 2.24778300  | 1.75330400  | -1.24788400 |
| H | 2.76149400  | -4.29626700 | -0.13536700 |
| H | 1.04244600  | -3.31220600 | 1.40290400  |
| H | 3.08569500  | -0.51604700 | -2.14932200 |
| H | 3.74546700  | -2.86530900 | -1.92776100 |
| H | 0.30088200  | 3.81828200  | -1.40739900 |
| H | 2.68846000  | 3.09461300  | 0.37694500  |

|   |             |             |             |
|---|-------------|-------------|-------------|
| H | 3.26884300  | 1.36483200  | -1.22130600 |
| N | 0.13225000  | -0.84888300 | 1.31716400  |
| N | 1.38327200  | 0.81665800  | -0.51286200 |
| N | -0.07816000 | 2.56241400  | 0.21120400  |
| O | -0.26857900 | -1.47492600 | 2.36213100  |
| C | -1.80016400 | -0.13650300 | -0.10008600 |
| C | -2.48748900 | 0.81702000  | -0.86224600 |
| C | -2.19814900 | -1.47748600 | -0.15223200 |
| C | -3.54328400 | 0.42654400  | -1.68501100 |
| H | -2.19654900 | 1.85921100  | -0.79183900 |
| C | -3.25094300 | -1.86345500 | -0.98211900 |
| H | -1.70016000 | -2.21926900 | 0.46179100  |
| C | -3.92310000 | -0.91492300 | -1.75365400 |
| H | -4.07132500 | 1.17413200  | -2.27090900 |
| H | -3.54778400 | -2.90804000 | -1.01928200 |
| H | -4.74308700 | -1.21832400 | -2.39920100 |
| H | 1.93434700  | 1.80201800  | -2.30024600 |
| H | 2.76164100  | 3.84701800  | -1.22206100 |
| H | 0.68625300  | 4.48873700  | 0.16986600  |
| O | -1.34860800 | 0.87053200  | 1.93376000  |
| O | -0.38349900 | 1.21524200  | 2.96765400  |
| H | -0.34464900 | 0.34212300  | 3.41286700  |

|                                              |                             |
|----------------------------------------------|-----------------------------|
| Zero-point correction=                       | 0.311462 (Hartree/Particle) |
| Thermal correction to Energy=                | 0.329298                    |
| Thermal correction to Enthalpy=              | 0.330243                    |
| Thermal correction to Gibbs Free Energy=     | 0.265482                    |
| Sum of electronic and zero-point Energies=   | -1046.515525                |
| Sum of electronic and thermal Energies=      | -1046.497689                |
| Sum of electronic and thermal Enthalpies=    | -1046.496744                |
| Sum of electronic and thermal Free Energies= | -1046.561505                |

### 1e,*anti*(amid)

|   |             |             |             |
|---|-------------|-------------|-------------|
| C | -2.47660000 | -3.33176500 | -0.12978200 |
| C | -1.41158000 | -2.77389200 | -0.82697000 |
| C | -1.09425800 | -1.42109200 | -0.65727100 |
| C | -1.85841500 | -0.60405000 | 0.20251400  |
| C | -2.91032600 | -1.19037300 | 0.91774900  |
| C | -3.21883200 | -2.54089600 | 0.75001500  |
| C | -0.37287100 | 1.29751500  | -0.16826100 |
| C | 0.67286700  | 0.34238000  | -0.79226200 |
| C | -0.94437000 | 3.52689200  | 0.41792900  |
| C | -2.40223400 | 3.08980400  | 0.29966000  |
| C | -2.56700800 | 1.68430100  | 0.87300800  |
| H | -2.71679200 | -4.38231200 | -0.26159900 |
| H | -0.80024100 | -3.35368700 | -1.50732700 |
| H | -3.49092900 | -0.59829200 | 1.61534900  |
| H | -4.04062300 | -2.97055400 | 1.31512500  |

|   |             |             |             |
|---|-------------|-------------|-------------|
| H | -0.68065500 | 3.71144100  | 1.47022200  |
| H | -2.69841500 | 3.08741600  | -0.75603200 |
| H | -3.55737800 | 1.29296500  | 0.62767900  |
| N | -0.01170600 | -0.86508200 | -1.35559200 |
| N | -1.56464700 | 0.77022000  | 0.29867100  |
| N | -0.02664400 | 2.53454500  | -0.12543400 |
| O | 0.61616600  | -1.55541500 | -2.22440400 |
| C | 1.75055600  | -0.11222400 | 0.18971200  |
| C | 2.91479200  | -0.70024400 | -0.32265400 |
| C | 1.57210300  | -0.02943000 | 1.57302300  |
| C | 3.88658300  | -1.19129300 | 0.54495100  |
| H | 3.04676300  | -0.75970100 | -1.39646500 |
| C | 2.54834400  | -0.52472900 | 2.44075400  |
| H | 0.67683600  | 0.42666300  | 1.98525200  |
| C | 3.70700700  | -1.10618500 | 1.92877200  |
| H | 4.79016400  | -1.63888800 | 0.13989900  |
| H | 2.40040400  | -0.45191300 | 3.51492100  |
| H | 4.46863800  | -1.48966600 | 2.60259300  |
| H | -2.47357200 | 1.69682400  | 1.96770200  |
| H | -3.06986600 | 3.77858500  | 0.82861000  |
| H | -0.77712500 | 4.47040400  | -0.11264200 |
| O | 1.20362100  | 0.95681200  | -1.96129000 |
| O | 2.15953000  | 1.97603000  | -1.57524000 |
| H | 1.53468700  | 2.59519700  | -1.11465000 |

|                                              |                             |
|----------------------------------------------|-----------------------------|
| Zero-point correction=                       | 0.311330 (Hartree/Particle) |
| Thermal correction to Energy=                | 0.329164                    |
| Thermal correction to Enthalpy=              | 0.330108                    |
| Thermal correction to Gibbs Free Energy=     | 0.265595                    |
| Sum of electronic and zero-point Energies=   | -1046.513615                |
| Sum of electronic and thermal Energies=      | -1046.495781                |
| Sum of electronic and thermal Enthalpies=    | -1046.494837                |
| Sum of electronic and thermal Free Energies= | -1046.559350                |

### **2a,anti**

|   |             |             |             |
|---|-------------|-------------|-------------|
| C | 0.00690506  | 0.04461879  | 0.01484711  |
| C | 0.00548491  | 0.04117959  | 1.40402214  |
| C | 1.21578309  | 0.01417460  | 2.11066053  |
| C | 2.45244655  | -0.03017266 | 1.42695150  |
| C | 2.43058474  | -0.00012187 | 0.02443755  |
| C | 1.22252266  | 0.03311441  | -0.67304096 |
| C | 3.71142387  | 0.10909592  | 3.53068016  |
| C | 2.41413460  | 0.43467574  | 4.28229950  |
| C | 6.06327323  | -0.13025322 | 3.60140716  |
| C | 5.92853043  | -1.03968241 | 2.38344953  |
| C | 4.88623069  | -0.46025423 | 1.43229684  |
| H | -0.93358637 | 0.06813550  | -0.52718332 |
| H | -0.91155359 | 0.06228126  | 1.97934982  |

|   |            |             |             |
|---|------------|-------------|-------------|
| H | 3.35883084 | 0.00602798  | -0.53350271 |
| H | 1.23964296 | 0.05344265  | -1.75886304 |
| H | 6.52021786 | 0.83019056  | 3.31702911  |
| H | 5.60919968 | -2.03593967 | 2.71182854  |
| H | 4.63593420 | -1.19355092 | 0.66014026  |
| N | 1.20773573 | 0.01878504  | 3.50829613  |
| N | 3.64894275 | -0.11949380 | 2.15234749  |
| N | 4.77964974 | 0.12587765  | 4.23503581  |
| O | 0.08803328 | 0.00758318  | 4.13426388  |
| H | 5.27918248 | 0.43358390  | 0.92670468  |
| H | 6.88037578 | -1.15310562 | 1.85243095  |
| H | 6.72883656 | -0.57715470 | 4.34885855  |
| C | 2.38855298 | -0.28196019 | 5.65891074  |
| H | 3.20518571 | 0.14426168  | 6.24176337  |
| H | 1.44457558 | -0.00402866 | 6.13521314  |
| C | 2.52219803 | -1.79423506 | 5.62674494  |
| C | 3.74311955 | -2.40421551 | 5.95110474  |
| C | 1.43066713 | -2.61830833 | 5.31203654  |
| C | 3.87542957 | -3.79362997 | 5.95110298  |
| H | 4.59311809 | -1.77737210 | 6.20392828  |
| C | 1.56214971 | -4.00798050 | 5.30865348  |
| H | 0.47487912 | -2.16374482 | 5.07050062  |
| C | 2.78471505 | -4.60186963 | 5.62627465  |
| H | 4.83015571 | -4.24449440 | 6.21145850  |
| H | 0.70310837 | -4.62759631 | 5.06303641  |
| H | 2.88457364 | -5.68442326 | 5.62779418  |
| C | 2.24518798 | 1.99609417  | 4.44935372  |
| H | 2.23612808 | 2.42618824  | 3.44019745  |
| H | 1.23772411 | 2.12665311  | 4.85850841  |
| C | 3.24832972 | 2.73673770  | 5.30205208  |
| C | 4.38318643 | 3.32876837  | 4.73017739  |
| C | 3.04093483 | 2.89714194  | 6.67939969  |
| C | 5.29182010 | 4.04331794  | 5.50945956  |
| H | 4.55112557 | 3.23280542  | 3.65997504  |
| C | 3.94952004 | 3.60748822  | 7.46520923  |
| H | 2.15384964 | 2.46805558  | 7.13907908  |
| C | 5.08012350 | 4.18156208  | 6.88273919  |
| H | 6.16301934 | 4.49719518  | 5.04390692  |
| H | 3.76786535 | 3.71959773  | 8.53096899  |
| H | 5.78586164 | 4.74025740  | 7.49176424  |

Zero-point correction= 0.442097 (Hartree/Particle)  
 Thermal correction to Energy= 0.465054  
 Thermal correction to Enthalpy= 0.465998  
 Thermal correction to Gibbs Free Energy= 0.388925  
 Sum of electronic and zero-point Energies= -1205.651279  
 Sum of electronic and thermal Energies= -1205.628322  
 Sum of electronic and thermal Enthalpies= -1205.627378  
 Sum of electronic and thermal Free Energies= -1205.704451

**2a,syn**

|   |             |             |             |
|---|-------------|-------------|-------------|
| C | -0.00844714 | -0.03575835 | 0.03228179  |
| C | -0.00326380 | -0.01261218 | 1.42063808  |
| C | 1.20984388  | -0.00412219 | 2.12593249  |
| C | 2.44560025  | -0.02016518 | 1.43596563  |
| C | 2.41452296  | -0.03127303 | 0.03331076  |
| C | 1.20358203  | -0.04299016 | -0.66035219 |
| C | 3.69023566  | 0.15724638  | 3.54131456  |
| C | 2.40992581  | -0.13169536 | 4.34413646  |
| C | 6.00884251  | 0.58222627  | 3.54540627  |
| C | 6.10351968  | -0.31267302 | 2.31265494  |
| C | 4.91471990  | -0.03934195 | 1.39800043  |
| H | -0.95189974 | -0.04427896 | -0.50512733 |
| H | -0.91831238 | 0.00208481  | 1.99886927  |
| H | 3.33604846  | -0.01498773 | -0.53414182 |
| H | 1.21733939  | -0.05081505 | -1.74634837 |
| H | 6.12008909  | 1.63931930  | 3.25844664  |
| H | 6.09475666  | -1.36283632 | 2.62937732  |
| H | 4.83668029  | -0.83091132 | 0.64548935  |
| N | 1.18806606  | 0.03927419  | 3.52053302  |
| N | 3.65214838  | -0.00195093 | 2.15418795  |
| N | 4.73917976  | 0.40372441  | 4.23324418  |
| O | 0.06426512  | 0.08353992  | 4.13703468  |
| H | 5.04685654  | 0.91238955  | 0.86472660  |
| H | 7.03195705  | -0.14533525 | 1.75538825  |
| H | 6.81704043  | 0.36315536  | 4.25203775  |
| C | 2.30520806  | 0.79798289  | 5.58402605  |
| H | 1.39757897  | 0.50412330  | 6.11462201  |
| H | 3.16188120  | 0.56324746  | 6.21812541  |
| C | 2.28070096  | 2.29112342  | 5.30460213  |
| C | 1.10325305  | 2.93829431  | 4.89851065  |
| C | 3.43328526  | 3.06847423  | 5.49282845  |
| C | 1.08566946  | 4.31571873  | 4.67371435  |
| H | 0.19835680  | 2.35498979  | 4.76002490  |
| C | 3.41607826  | 4.44647103  | 5.27314625  |
| H | 4.34963200  | 2.58097724  | 5.81125767  |
| C | 2.24140193  | 5.07604471  | 4.85863235  |
| H | 0.16202725  | 4.79621378  | 4.36025513  |
| H | 4.32100637  | 5.02860604  | 5.43052951  |
| H | 2.22491659  | 6.14964677  | 4.68825399  |
| C | 2.52659602  | -1.64607312 | 4.77609371  |
| H | 2.62960256  | -2.23181371 | 3.85403307  |
| H | 3.47972019  | -1.72094266 | 5.30860528  |
| C | 1.41669522  | -2.22882283 | 5.62152633  |
| C | 0.29823705  | -2.83256850 | 5.02954674  |
| C | 1.50733588  | -2.22444431 | 7.02062422  |
| C | -0.70546777 | -3.40242362 | 5.81107304  |
| H | 0.21281393  | -2.85349013 | 3.94620690  |
| C | 0.50352217  | -2.79116478 | 7.80704700  |

|   |             |             |            |
|---|-------------|-------------|------------|
| H | 2.37728026  | -1.77958533 | 7.49830314 |
| C | -0.60763878 | -3.38155343 | 7.20379449 |
| H | -1.56438649 | -3.86489226 | 5.33179322 |
| H | 0.59456983  | -2.77780119 | 8.89009234 |
| H | -1.38857436 | -3.82801187 | 7.81368709 |

|                                              |                             |
|----------------------------------------------|-----------------------------|
| Zero-point correction=                       | 0.442362 (Hartree/Particle) |
| Thermal correction to Energy=                | 0.465290                    |
| Thermal correction to Enthalpy=              | 0.466234                    |
| Thermal correction to Gibbs Free Energy=     | 0.389133                    |
| Sum of electronic and zero-point Energies=   | -1205.650359                |
| Sum of electronic and thermal Energies=      | -1205.627430                |
| Sum of electronic and thermal Enthalpies=    | -1205.626486                |
| Sum of electronic and thermal Free Energies= | -1205.703588                |

## 2b,syn

|   |             |             |             |
|---|-------------|-------------|-------------|
| C | 3.65304700  | -2.41658000 | -0.80453200 |
| C | 2.74141200  | -1.56925000 | -1.42169900 |
| C | 1.76983600  | -0.90460300 | -0.66000000 |
| C | 1.68288800  | -1.10463500 | 0.73570300  |
| C | 2.62571700  | -1.94890100 | 1.34093600  |
| C | 3.59755500  | -2.59834500 | 0.57927200  |
| C | -0.10304200 | 0.56469500  | 0.94091400  |
| C | 0.04570500  | 0.94587000  | -0.54703600 |
| C | -1.16499000 | 1.00453300  | 3.00754400  |
| C | -0.94447600 | -0.46853300 | 3.34053000  |
| C | 0.43866900  | -0.89340200 | 2.85914200  |
| H | 4.40627500  | -2.92519700 | -1.39829100 |
| H | 2.74984000  | -1.39808100 | -2.49079600 |
| H | 2.61035900  | -2.10153200 | 2.41281400  |
| H | 4.31254300  | -3.24693900 | 1.07689700  |
| H | -0.49489200 | 1.64180300  | 3.60443300  |
| H | -1.70887700 | -1.07007100 | 2.83493300  |
| H | 0.53534200  | -1.98225000 | 2.90464700  |
| N | 0.85436800  | -0.05630600 | -1.29103800 |
| N | 0.66400000  | -0.47860600 | 1.46393200  |
| N | -0.94062900 | 1.27298700  | 1.59578600  |
| O | 0.79196400  | -0.04262400 | -2.57326400 |
| H | 1.21975500  | -0.46238600 | 3.50155600  |
| H | -1.02636100 | -0.65956500 | 4.41628700  |
| H | -2.18590900 | 1.31525500  | 3.25507800  |
| C | -1.36650500 | 1.01011800  | -1.20666300 |
| H | -1.88452200 | 1.85774900  | -0.75662700 |
| H | -1.21488400 | 1.22168100  | -2.26647800 |
| C | -2.21529800 | -0.23927400 | -1.05275200 |
| C | -3.25227600 | -0.27393700 | -0.10848000 |
| C | -2.01312800 | -1.36773100 | -1.86192400 |
| C | -4.05612400 | -1.40601600 | 0.03484300  |

|   |             |             |             |
|---|-------------|-------------|-------------|
| H | -3.42556900 | 0.59854200  | 0.51498400  |
| C | -2.81396000 | -2.50184400 | -1.71720500 |
| H | -1.22624600 | -1.35303200 | -2.60997400 |
| C | -3.83634300 | -2.52720700 | -0.76733100 |
| H | -4.85911900 | -1.40806400 | 0.76789400  |
| H | -2.64190200 | -3.36515300 | -2.35517600 |
| H | -4.46255500 | -3.40919400 | -0.65975900 |
| C | 0.79651900  | 2.36774100  | -0.64927300 |
| C | 2.11934500  | 2.36052200  | 0.15634400  |
| C | 1.11050200  | 2.78338600  | -2.11098700 |
| H | 2.80958500  | 1.61711000  | -0.25258300 |
| H | 2.59702600  | 3.34214400  | 0.08569400  |
| H | 1.94995900  | 2.14566300  | 1.21461600  |
| H | 1.57294200  | 3.77535500  | -2.09998900 |
| H | 1.80003100  | 2.07583100  | -2.57380000 |
| H | 0.20988200  | 2.83760900  | -2.72572300 |
| C | -0.05983200 | 3.43808100  | -0.09487300 |
| N | -0.65055800 | 4.37129500  | 0.26426900  |

|                                              |                             |
|----------------------------------------------|-----------------------------|
| Zero-point correction=                       | 0.414974 (Hartree/Particle) |
| Thermal correction to Energy=                | 0.437893                    |
| Thermal correction to Enthalpy=              | 0.438837                    |
| Thermal correction to Gibbs Free Energy=     | 0.363172                    |
| Sum of electronic and zero-point Energies=   | -1145.515961                |
| Sum of electronic and thermal Energies=      | -1145.493043                |
| Sum of electronic and thermal Enthalpies=    | -1145.492098                |
| Sum of electronic and thermal Free Energies= | -1145.567763                |

## **2b,anti**

|   |             |             |             |
|---|-------------|-------------|-------------|
| C | -1.82191200 | -3.36236800 | -1.91199600 |
| C | -1.24151800 | -2.12258500 | -2.14360500 |
| C | -0.99723200 | -1.24557800 | -1.07575400 |
| C | -1.34195300 | -1.60453000 | 0.24675800  |
| C | -1.92019000 | -2.86480200 | 0.45768000  |
| C | -2.15927900 | -3.73261800 | -0.60866900 |
| C | -0.32972000 | 0.44801200  | 1.12730600  |
| C | -0.15516000 | 1.02234300  | -0.29308700 |
| C | 0.05236000  | 0.67989100  | 3.44632100  |
| C | -1.29623600 | -0.00007200 | 3.66505400  |
| C | -1.44911500 | -1.13873900 | 2.66443600  |
| H | -2.00779700 | -4.03561900 | -2.74314900 |
| H | -0.96419800 | -1.79454100 | -3.13718000 |
| H | -2.17953700 | -3.18734200 | 1.45753600  |
| H | -2.60745100 | -4.70175200 | -0.41034800 |
| H | 0.87273500  | -0.01146500 | 3.69298000  |
| H | -2.09979000 | 0.73358000  | 3.52437400  |
| H | -2.48694300 | -1.48768300 | 2.64869600  |
| N | -0.41554300 | -0.00422000 | -1.33563800 |



|   |             |             |             |
|---|-------------|-------------|-------------|
| N | -1.09110400 | -0.71136400 | 1.30111600  |
| N | 0.20896300  | 1.12644100  | 2.07037000  |
| O | -0.15186100 | 0.33223200  | -2.54357700 |
| H | -0.81780900 | -1.99032700 | 2.95360000  |
| H | -1.39263300 | -0.39884800 | 4.68089300  |
| H | 0.16715300  | 1.54854300  | 4.10400100  |
| C | 1.31022000  | 1.52785500  | -0.48328800 |
| H | 1.36746800  | 1.95340800  | -1.48707700 |
| H | 1.46806600  | 2.32895000  | 0.23874200  |
| C | 2.39247000  | 0.47676700  | -0.31363400 |
| C | 2.71914000  | -0.39862600 | -1.36091600 |
| C | 3.12439200  | 0.38906600  | 0.87969500  |
| C | 3.73472900  | -1.34396700 | -1.21072200 |
| H | 2.17501900  | -0.33261700 | -2.29837500 |
| C | 4.14292700  | -0.55309700 | 1.02988600  |
| H | 2.88993000  | 1.06985200  | 1.69247400  |
| C | 4.44939400  | -1.42666800 | -0.01459600 |
| H | 3.97314800  | -2.01122400 | -2.03515500 |
| H | 4.70187600  | -0.59910600 | 1.96140900  |
| H | 5.24446800  | -2.15917100 | 0.09911400  |
| C | -1.21022200 | 2.21568800  | -0.54134900 |
| C | -2.65441000 | 1.66671000  | -0.65129100 |
| C | -1.17466500 | 3.31033000  | 0.55686500  |
| H | -2.93020100 | 1.14040500  | 0.26799500  |
| H | -3.35172400 | 2.49809100  | -0.79035900 |
| H | -2.76753800 | 0.98648400  | -1.49811200 |
| H | -1.83391500 | 4.12941600  | 0.25301200  |
| H | -1.52494400 | 2.91306200  | 1.51048100  |
| H | -0.17221000 | 3.71579600  | 0.70402700  |
| C | -0.89790800 | 2.91289500  | -1.80853200 |
| N | -0.72588200 | 3.57468800  | -2.74732500 |

|                                              |                             |
|----------------------------------------------|-----------------------------|
| Zero-point correction=                       | 0.415296 (Hartree/Particle) |
| Thermal correction to Energy=                | 0.438180                    |
| Thermal correction to Enthalpy=              | 0.439124                    |
| Thermal correction to Gibbs Free Energy=     | 0.363791                    |
| Sum of electronic and zero-point Energies=   | -1145.513718                |
| Sum of electronic and thermal Energies=      | -1145.490834                |
| Sum of electronic and thermal Enthalpies=    | -1145.489890                |
| Sum of electronic and thermal Free Energies= | -1145.565223                |

### **2c,syn(N-O)**

|   |             |             |             |
|---|-------------|-------------|-------------|
| C | -3.77285100 | -1.66446300 | -0.95883900 |
| C | -2.77010300 | -1.86165900 | -0.01966200 |
| C | -1.81109600 | -0.86352100 | 0.20860900  |
| C | -1.84056100 | 0.35355100  | -0.51317400 |
| C | -2.87443300 | 0.53559400  | -1.44423100 |
| C | -3.82510900 | -0.46096600 | -1.66656800 |

|   |             |             |             |
|---|-------------|-------------|-------------|
| C | 0.03035600  | 1.27812400  | 0.78274900  |
| C | 0.09250500  | 0.00438100  | 1.63855200  |
| C | 0.84896600  | 3.45248700  | 0.39733500  |
| C | 0.51359200  | 3.23169800  | -1.07571500 |
| C | -0.81857500 | 2.49719400  | -1.18741800 |
| H | -4.51319700 | -2.43940500 | -1.13223900 |
| H | -2.69568700 | -2.77257600 | 0.56098900  |
| H | -2.95486200 | 1.46421800  | -1.99476200 |
| H | -4.61185100 | -0.28625600 | -2.39468500 |
| H | 0.12994000  | 4.14888600  | 0.85543100  |
| H | 1.30428200  | 2.62895600  | -1.53812500 |
| H | -0.96322200 | 2.14056000  | -2.21186500 |
| N | -0.81089000 | -1.07389800 | 1.15159100  |
| N | -0.86072900 | 1.33065600  | -0.29006400 |
| N | 0.83808300  | 2.20173500  | 1.14094200  |
| O | -0.77567200 | -2.15667600 | 1.84440000  |
| H | -1.65232700 | 3.17202000  | -0.94813500 |
| H | 0.45059600  | 4.17693800  | -1.62630500 |
| H | 1.83820800  | 3.90995900  | 0.50992500  |
| C | 1.54040000  | -0.54623600 | 1.70582400  |
| H | 2.12035900  | 0.24147000  | 2.18958600  |
| H | 1.50784500  | -1.41480000 | 2.37058600  |
| C | 2.15810000  | -0.92725800 | 0.37671000  |
| C | 3.04349600  | -0.05541600 | -0.27307300 |
| C | 1.86798700  | -2.15902300 | -0.22871200 |
| C | 3.62054500  | -0.40054700 | -1.49642000 |
| H | 3.28172800  | 0.89752500  | 0.19181800  |
| C | 2.44210800  | -2.50508600 | -1.45265700 |
| H | 1.18960500  | -2.84804900 | 0.26711900  |
| C | 3.31942600  | -1.62679600 | -2.09169500 |
| H | 4.31131200  | 0.28559400  | -1.98044500 |
| H | 2.20735400  | -3.46540500 | -1.90477100 |
| H | 3.77044700  | -1.89905100 | -3.04246200 |
| O | -0.35666900 | 0.36144700  | 2.92869200  |
| H | -0.41557000 | -0.48055300 | 3.41664100  |

Zero-point correction= 0.336646 (Hartree/Particle)  
 Thermal correction to Energy= 0.354741  
 Thermal correction to Enthalpy= 0.355685  
 Thermal correction to Gibbs Free Energy= 0.289620  
 Sum of electronic and zero-point Energies= -1010.692828  
 Sum of electronic and thermal Energies= -1010.674732  
 Sum of electronic and thermal Enthalpies= -1010.673788  
 Sum of electronic and thermal Free Energies= -1010.739854

### **2c,anti(N-O)**

|   |            |             |             |
|---|------------|-------------|-------------|
| C | 1.89326300 | -3.49024100 | -0.61375700 |
| C | 1.12050100 | -2.90877300 | 0.38174400  |

|   |             |             |             |
|---|-------------|-------------|-------------|
| C | 0.99574900  | -1.51300500 | 0.45289500  |
| C | 1.66559300  | -0.67355500 | -0.47011700 |
| C | 2.43029400  | -1.28641700 | -1.47393800 |
| C | 2.54335100  | -2.67540200 | -1.54412300 |
| C | 0.60921100  | 1.33789500  | 0.45310100  |
| C | -0.06203200 | 0.51297400  | 1.56065000  |
| C | 0.93165700  | 3.45374500  | -0.53040900 |
| C | 2.36740200  | 3.01239800  | -0.80426600 |
| C | 2.37137900  | 1.55706400  | -1.25993900 |
| H | 1.98508900  | -4.57070700 | -0.66698200 |
| H | 0.59997500  | -3.49926700 | 1.12544600  |
| H | 2.93917300  | -0.68411200 | -2.21551000 |
| H | 3.14332300  | -3.11621600 | -2.33488800 |
| H | 0.35316200  | 3.47826700  | -1.46705600 |
| H | 2.95622200  | 3.11275600  | 0.11522100  |
| H | 3.39338300  | 1.16444100  | -1.25704100 |
| N | 0.22292000  | -0.94293700 | 1.45550600  |
| N | 1.56172400  | 0.72011800  | -0.35995900 |
| N | 0.26755100  | 2.56869900  | 0.41488300  |
| O | -0.25159400 | -1.65126700 | 2.41779700  |
| H | 1.98573300  | 1.47310700  | -2.28581700 |
| H | 2.84434900  | 3.63171000  | -1.57200200 |
| H | 0.90540700  | 4.47004800  | -0.12189200 |
| C | -1.59817200 | 0.72289200  | 1.58089200  |
| H | -1.96557900 | 0.17901200  | 2.45649200  |
| H | -1.73919300 | 1.79136400  | 1.75189000  |
| C | -2.33810200 | 0.27159200  | 0.33914500  |
| C | -2.71512900 | -1.06988800 | 0.17690600  |
| C | -2.66899800 | 1.18573800  | -0.67101700 |
| C | -3.40011000 | -1.48604400 | -0.96521300 |
| H | -2.46805100 | -1.78843800 | 0.95418100  |
| C | -3.35612800 | 0.77195900  | -1.81325400 |
| H | -2.38480400 | 2.22770700  | -0.55276200 |
| C | -3.72263300 | -0.56638000 | -1.96493000 |
| H | -3.68661500 | -2.52930700 | -1.07141300 |
| H | -3.61006300 | 1.49707100  | -2.58259500 |
| H | -4.26069600 | -0.88936900 | -2.85245200 |
| O | 0.50479200  | 0.95141700  | 2.77761500  |
| H | 0.21566900  | 0.29025500  | 3.43464800  |

|                                              |                             |
|----------------------------------------------|-----------------------------|
| Zero-point correction=                       | 0.336511 (Hartree/Particle) |
| Thermal correction to Energy=                | 0.354568                    |
| Thermal correction to Enthalpy=              | 0.355513                    |
| Thermal correction to Gibbs Free Energy=     | 0.289805                    |
| Sum of electronic and zero-point Energies=   | -1010.693130                |
| Sum of electronic and thermal Energies=      | -1010.675073                |
| Sum of electronic and thermal Enthalpies=    | -1010.674129                |
| Sum of electronic and thermal Free Energies= | -1010.739837                |

**2c,syn(amid)**

|   |             |             |             |
|---|-------------|-------------|-------------|
| C | 3.22242900  | -2.14458100 | -0.70902400 |
| C | 2.60952000  | -1.70052600 | 0.45570100  |
| C | 1.27001400  | -1.28656400 | 0.43816300  |
| C | 0.52529000  | -1.31918800 | -0.76546200 |
| C | 1.16317800  | -1.76967400 | -1.92799500 |
| C | 2.49831300  | -2.17616300 | -1.90200700 |
| C | -1.49321500 | -0.66752500 | 0.41436600  |
| C | -0.68568500 | -0.26650600 | 1.65988600  |
| C | -3.62040500 | -0.96575000 | -0.54381900 |
| C | -3.00069200 | -0.44746000 | -1.84255000 |
| C | -1.60101400 | -1.03092100 | -2.01599600 |
| H | 4.26033500  | -2.46272300 | -0.68547400 |
| H | 3.13517400  | -1.65550000 | 1.40128400  |
| H | 0.62128400  | -1.81439900 | -2.86422000 |
| H | 2.96435500  | -2.52098900 | -2.82033500 |
| H | -3.77948400 | -2.05343400 | -0.60374300 |
| H | -2.94036600 | 0.64631600  | -1.79857400 |
| H | -1.05911800 | -0.48340500 | -2.79445500 |
| N | 0.68283000  | -0.82874800 | 1.62170300  |
| N | -0.82900300 | -0.93430400 | -0.76587300 |
| N | -2.76385300 | -0.66372100 | 0.59508600  |
| O | 1.37747100  | -0.70203700 | 2.68767400  |
| H | -1.65545800 | -2.08378600 | -2.32506800 |
| H | -3.60934200 | -0.70989600 | -2.71466800 |
| H | -4.60221700 | -0.51336500 | -0.36847800 |
| C | -0.59716700 | 1.28446300  | 1.81714600  |
| H | -1.62751400 | 1.62272600  | 1.96160300  |
| H | -0.06105200 | 1.42814300  | 2.76013400  |
| C | 0.06218700  | 2.05441800  | 0.69644900  |
| C | -0.70926600 | 2.68964900  | -0.28708300 |
| C | 1.45889000  | 2.16150700  | 0.62136300  |
| C | -0.10590800 | 3.40481800  | -1.32276900 |
| H | -1.79443800 | 2.63504600  | -0.22837100 |
| C | 2.06531800  | 2.87400700  | -0.41358600 |
| H | 2.06970100  | 1.68272200  | 1.38262000  |
| C | 1.28538600  | 3.49692800  | -1.38996500 |
| H | -0.72211400 | 3.89798000  | -2.07054100 |
| H | 3.14899600  | 2.94734800  | -0.45363800 |
| H | 1.75822400  | 4.05738800  | -2.19219700 |
| O | -1.32271600 | -0.78569500 | 2.79338600  |
| H | -2.25787500 | -0.87648400 | 2.51231600  |

|                                            |                             |
|--------------------------------------------|-----------------------------|
| Zero-point correction=                     | 0.336613 (Hartree/Particle) |
| Thermal correction to Energy=              | 0.354704                    |
| Thermal correction to Enthalpy=            | 0.355648                    |
| Thermal correction to Gibbs Free Energy=   | 0.289409                    |
| Sum of electronic and zero-point Energies= | -1010.695847                |
| Sum of electronic and thermal Energies=    | -1010.677756                |
| Sum of electronic and thermal Enthalpies=  | -1010.676812                |

Sum of electronic and thermal Free Energies= -1010.743051

**2c,anti(amid)**

|   |             |             |             |
|---|-------------|-------------|-------------|
| C | 2.25200100  | 3.04424300  | -0.26490300 |
| C | 1.74046800  | 2.34609400  | 0.82142900  |
| C | 0.61928700  | 1.51904200  | 0.66666400  |
| C | -0.02463200 | 1.41006000  | -0.58835700 |
| C | 0.53156900  | 2.09125100  | -1.67828800 |
| C | 1.65498700  | 2.90375500  | -1.51920500 |
| C | -1.65913500 | -0.15219000 | 0.32033300  |
| C | -0.80273400 | -0.33110000 | 1.58847000  |
| C | -3.66858600 | -0.75907700 | -0.78006900 |
| C | -3.50543400 | 0.52642800  | -1.58881700 |
| C | -2.03063900 | 0.75441100  | -1.92058800 |
| H | 3.12181400  | 3.68141100  | -0.13648900 |
| H | 2.18529500  | 2.40689900  | 1.80683600  |
| H | 0.10038700  | 1.98283400  | -2.66597400 |
| H | 2.06018600  | 3.42179300  | -2.38338700 |
| H | -3.49276600 | -1.63829700 | -1.41811900 |
| H | -3.87686100 | 1.37590600  | -1.00300000 |
| H | -1.90045100 | 1.75738500  | -2.33178600 |
| N | 0.14701100  | 0.79025300  | 1.76372800  |
| N | -1.20113500 | 0.64383600  | -0.70888800 |
| N | -2.75828800 | -0.81598400 | 0.35376100  |
| O | 0.73332400  | 0.86896100  | 2.89732100  |
| H | -1.67921200 | 0.03415000  | -2.67159300 |
| H | -4.08416000 | 0.48989600  | -2.51841300 |
| H | -4.69335200 | -0.85307600 | -0.40346900 |
| C | -0.01662100 | -1.67991600 | 1.57206000  |
| H | 0.49027200  | -1.71111500 | 2.54125800  |
| H | -0.78330700 | -2.46059400 | 1.56811900  |
| C | 0.96187500  | -1.89515200 | 0.44064000  |
| C | 2.28909500  | -1.45476500 | 0.54537700  |
| C | 0.56571300  | -2.54675000 | -0.73622200 |
| C | 3.19215000  | -1.65262600 | -0.49931500 |
| H | 2.61099800  | -0.95246200 | 1.45437500  |
| C | 1.46644500  | -2.74688700 | -1.78317400 |
| H | -0.45586400 | -2.91039100 | -0.82411400 |
| C | 2.78350200  | -2.29861300 | -1.66773200 |
| H | 4.21721400  | -1.30567000 | -0.39859300 |
| H | 1.14252800  | -3.26138600 | -2.68454000 |
| H | 3.48838400  | -2.45800800 | -2.47953200 |
| O | -1.65373100 | -0.33331100 | 2.69998500  |
| H | -2.49684500 | -0.68046000 | 2.33994000  |

Zero-point correction= 0.336467 (Hartree/Particle)

Thermal correction to Energy= 0.354550

Thermal correction to Enthalpy= 0.355494

|                                              |              |
|----------------------------------------------|--------------|
| Thermal correction to Gibbs Free Energy=     | 0.289850     |
| Sum of electronic and zero-point Energies=   | -1010.694557 |
| Sum of electronic and thermal Energies=      | -1010.676475 |
| Sum of electronic and thermal Enthalpies=    | -1010.675531 |
| Sum of electronic and thermal Free Energies= | -1010.741175 |

## 2d,syn

|   |             |             |             |
|---|-------------|-------------|-------------|
| C | -1.93486500 | 3.53984300  | -2.12568800 |
| C | -1.50454400 | 2.22095600  | -2.21403300 |
| C | -0.79833200 | 1.64191200  | -1.15471900 |
| C | -0.49087700 | 2.38553100  | 0.00495500  |
| C | -0.95224300 | 3.70728200  | 0.08451300  |
| C | -1.66439300 | 4.27759800  | -0.97109800 |
| C | 0.47333700  | 0.42495900  | 1.11412100  |
| C | -0.14147500 | -0.45414100 | 0.00897800  |
| C | 1.63594000  | 0.56171200  | 3.16250700  |
| C | 2.03666500  | 1.97411600  | 2.74197900  |
| C | 0.85180500  | 2.66109900  | 2.06857200  |
| H | -2.48706500 | 3.98531600  | -2.94759900 |
| H | -1.69881900 | 1.60801500  | -3.08560200 |
| H | -0.76519000 | 4.29726000  | 0.97362600  |
| H | -2.00873500 | 5.30398100  | -0.88279300 |
| H | 0.90951300  | 0.59738500  | 3.98879400  |
| H | 2.87434900  | 1.91775100  | 2.03674200  |
| H | 1.17279600  | 3.59679800  | 1.60173400  |
| N | -0.35089700 | 0.31569900  | -1.24213100 |
| N | 0.28416900  | 1.80209300  | 1.01889600  |
| N | 1.05660000  | -0.19943500 | 2.06567000  |
| O | -0.45556600 | -0.31967700 | -2.34983500 |
| H | 0.07615700  | 2.90573200  | 2.80826400  |
| H | 2.36428700  | 2.57250900  | 3.59936100  |
| H | 2.50390000  | 0.00808800  | 3.53868400  |
| C | 0.67624400  | -1.73140400 | -0.27177200 |
| H | 0.62046300  | -2.31177700 | 0.64995600  |
| H | 0.14174500  | -2.27294700 | -1.05288800 |
| C | 2.13195500  | -1.53321400 | -0.66104500 |
| C | 3.14759400  | -1.79748600 | 0.27032400  |
| C | 2.50522500  | -1.13793700 | -1.95435300 |
| C | 4.49314900  | -1.66342800 | -0.07351200 |
| H | 2.87276000  | -2.10628100 | 1.27429600  |
| C | 3.85103400  | -0.99800600 | -2.29837300 |
| H | 1.73417400  | -0.94051200 | -2.69149500 |
| C | 4.85100600  | -1.25863500 | -1.36055700 |
| H | 5.26207900  | -1.87906400 | 0.66458700  |
| H | 4.11689100  | -0.69050500 | -3.30684100 |
| H | 5.89864600  | -1.15387000 | -1.63149900 |
| O | -1.41780100 | -0.73909000 | 0.58729400  |
| O | -2.16563600 | -1.60152500 | -0.34450400 |

|   |             |             |             |
|---|-------------|-------------|-------------|
| C | -3.13927700 | -2.33719100 | 0.43435900  |
| C | -2.44327500 | -3.26168100 | 1.43906800  |
| C | -4.10461500 | -1.36545500 | 1.12498900  |
| C | -3.85398800 | -3.14013300 | -0.66064100 |
| H | -1.77262100 | -3.95520300 | 0.92072700  |
| H | -1.85631300 | -2.68169000 | 2.15596900  |
| H | -3.18485300 | -3.84875400 | 1.99258700  |
| H | -4.54782000 | -0.68516200 | 0.39050000  |
| H | -4.91141900 | -1.91803100 | 1.61940500  |
| H | -3.58514400 | -0.76807300 | 1.87905500  |
| H | -4.64057500 | -3.75574100 | -0.21175700 |
| H | -4.31165600 | -2.47057200 | -1.39543500 |
| H | -3.15105900 | -3.79859000 | -1.18050500 |

|                                              |                             |
|----------------------------------------------|-----------------------------|
| Zero-point correction=                       | 0.451764 (Hartree/Particle) |
| Thermal correction to Energy=                | 0.476648                    |
| Thermal correction to Enthalpy=              | 0.477592                    |
| Thermal correction to Gibbs Free Energy=     | 0.397269                    |
| Sum of electronic and zero-point Energies=   | -1242.864162                |
| Sum of electronic and thermal Energies=      | -1242.839279                |
| Sum of electronic and thermal Enthalpies=    | -1242.838335                |
| Sum of electronic and thermal Free Energies= | -1242.918658                |

## **2d,anti**

|   |             |             |             |
|---|-------------|-------------|-------------|
| C | 0.36448000  | 4.40176900  | -1.66886400 |
| C | 0.04388700  | 3.08662700  | -1.97857800 |
| C | 0.08801500  | 2.09623700  | -0.98898900 |
| C | 0.45191500  | 2.41364900  | 0.34123700  |
| C | 0.77135300  | 3.75043300  | 0.63006400  |
| C | 0.73037900  | 4.72960300  | -0.36161100 |
| C | 0.00567600  | 0.12446600  | 1.06321300  |
| C | 0.05432500  | -0.33315700 | -0.39891300 |
| C | -0.23785900 | -0.37175500 | 3.34171700  |
| C | 0.94976000  | 0.55715000  | 3.58893800  |
| C | 0.81755300  | 1.79226400  | 2.70415200  |
| H | 0.33179200  | 5.16364300  | -2.44158000 |
| H | -0.23924600 | 2.78534300  | -2.97921300 |
| H | 1.04199500  | 4.03945800  | 1.63742700  |
| H | 0.98196500  | 5.75396100  | -0.10229800 |
| H | -1.17701000 | 0.11696300  | 3.64467100  |
| H | 1.87423000  | 0.02112700  | 3.34386000  |
| H | 1.76867000  | 2.33553200  | 2.67409200  |
| N | -0.24133900 | 0.77556900  | -1.32676300 |
| N | 0.45435000  | 1.42163800  | 1.32747100  |
| N | -0.32259700 | -0.74691300 | 1.93782200  |
| O | -0.54666000 | 0.47964800  | -2.53536400 |
| H | 0.05772200  | 2.47629000  | 3.10746900  |
| H | 1.01376700  | 0.87008500  | 4.63693200  |

|   |             |             |             |
|---|-------------|-------------|-------------|
| H | -0.15279200 | -1.28698500 | 3.93739300  |
| C | -0.83162900 | -1.55668900 | -0.69733500 |
| H | -0.64550400 | -1.80018800 | -1.74577500 |
| H | -0.43362100 | -2.36331200 | -0.08272100 |
| C | -2.32513800 | -1.40975900 | -0.45131800 |
| C | -3.15431400 | -0.71825600 | -1.34734400 |
| C | -2.91973600 | -2.02910600 | 0.65785600  |
| C | -4.53120000 | -0.63666500 | -1.13046100 |
| H | -2.71672200 | -0.24492900 | -2.22025100 |
| C | -4.29583100 | -1.95388800 | 0.87285800  |
| H | -2.28989300 | -2.56516300 | 1.36053000  |
| C | -5.10855200 | -1.25310600 | -0.01995700 |
| H | -5.15391000 | -0.09509500 | -1.83841800 |
| H | -4.73331400 | -2.44568000 | 1.73842100  |
| H | -6.18144200 | -1.19334800 | 0.14521900  |
| O | 1.43675900  | -0.57964700 | -0.74948600 |
| O | 1.94136700  | -1.68975400 | 0.07713200  |
| C | 3.00985400  | -2.32563600 | -0.66687400 |
| C | 2.48359500  | -2.91805100 | -1.97862800 |
| C | 4.14743600  | -1.32570100 | -0.90938600 |
| C | 3.44292600  | -3.42862000 | 0.30807800  |
| H | 1.66960100  | -3.62355500 | -1.78191800 |
| H | 2.10813900  | -2.13025400 | -2.63647600 |
| H | 3.28473500  | -3.45300000 | -2.50091800 |
| H | 4.48272900  | -0.89449100 | 0.03979200  |
| H | 4.99939800  | -1.82516100 | -1.38408600 |
| H | 3.81852700  | -0.51225600 | -1.56121300 |
| H | 4.27173800  | -3.99818200 | -0.12520000 |
| H | 3.77638400  | -2.99859300 | 1.25792500  |
| H | 2.61607000  | -4.11709900 | 0.50922000  |

|                                              |                             |
|----------------------------------------------|-----------------------------|
| Zero-point correction=                       | 0.451856 (Hartree/Particle) |
| Thermal correction to Energy=                | 0.476694                    |
| Thermal correction to Enthalpy=              | 0.477638                    |
| Thermal correction to Gibbs Free Energy=     | 0.397677                    |
| Sum of electronic and zero-point Energies=   | -1242.861745                |
| Sum of electronic and thermal Energies=      | -1242.836907                |
| Sum of electronic and thermal Enthalpies=    | -1242.835963                |
| Sum of electronic and thermal Free Energies= | -1242.915924                |

### **2e,anti(N-O)**

|   |             |             |             |
|---|-------------|-------------|-------------|
| C | -2.02692400 | 3.43999800  | -0.81625000 |
| C | -1.26507200 | 2.88075500  | 0.20040000  |
| C | -1.04926500 | 1.49541800  | 0.24304900  |
| C | -1.60723700 | 0.64364300  | -0.73976500 |
| C | -2.36412900 | 1.23426000  | -1.76376200 |
| C | -2.57322400 | 2.61258500  | -1.80030700 |
| C | -0.46992800 | -1.30896400 | 0.19390500  |



|   |             |             |             |
|---|-------------|-------------|-------------|
| C | 0.05263300  | -0.47686800 | 1.37793100  |
| C | -0.56578400 | -3.41114700 | -0.86186800 |
| C | -2.00926900 | -3.06802800 | -1.22221100 |
| C | -2.09152500 | -1.60457900 | -1.64301900 |
| H | -2.18931000 | 4.51308600  | -0.84389500 |
| H | -0.82160400 | 3.48272800  | 0.98354200  |
| H | -2.78874900 | 0.62172300  | -2.54878000 |
| H | -3.16352500 | 3.03556300  | -2.60794100 |
| H | 0.07506900  | -3.35717900 | -1.75583900 |
| H | -2.64735400 | -3.23565900 | -0.34659500 |
| H | -3.13785800 | -1.28621700 | -1.69011700 |
| N | -0.28487600 | 0.95816800  | 1.27921200  |
| N | -1.39695000 | -0.73823100 | -0.67674800 |
| N | -0.04073000 | -2.51282700 | 0.15511100  |
| O | 0.10676000  | 1.69848000  | 2.25168900  |
| H | -1.65495400 | -1.46374600 | -2.64186800 |
| H | -2.38718600 | -3.69849300 | -2.03464400 |
| H | -0.48890500 | -4.43669800 | -0.48417400 |
| C | 1.57485300  | -0.65140700 | 1.59726900  |
| H | 1.80631100  | -0.10750800 | 2.51595000  |
| H | 1.73375300  | -1.71693000 | 1.76732500  |
| C | 2.43524900  | -0.15539400 | 0.45252900  |
| C | 2.77218500  | 1.20211000  | 0.34674800  |
| C | 2.92931800  | -1.04619400 | -0.51055200 |
| C | 3.57576300  | 1.65713900  | -0.69921400 |
| H | 2.40045200  | 1.90136900  | 1.09079700  |
| C | 3.73570500  | -0.59261200 | -1.55552300 |
| H | 2.67646000  | -2.09978300 | -0.43379500 |
| C | 4.05992700  | 0.76145400  | -1.65443500 |
| H | 3.82863200  | 2.71238200  | -0.76391400 |
| H | 4.11484200  | -1.29905700 | -2.28984300 |
| H | 4.69009200  | 1.11531200  | -2.46635500 |
| O | -0.50205600 | -0.97589700 | 2.59397400  |
| O | -1.93900200 | -0.76751700 | 2.56556600  |
| H | -1.99354500 | 0.05578600  | 3.08772900  |

|                                              |                             |
|----------------------------------------------|-----------------------------|
| Zero-point correction=                       | 0.340063 (Hartree/Particle) |
| Thermal correction to Energy=                | 0.359322                    |
| Thermal correction to Enthalpy=              | 0.360266                    |
| Thermal correction to Gibbs Free Energy=     | 0.291992                    |
| Sum of electronic and zero-point Energies=   | -1085.791302                |
| Sum of electronic and thermal Energies=      | -1085.772043                |
| Sum of electronic and thermal Enthalpies=    | -1085.771099                |
| Sum of electronic and thermal Free Energies= | -1085.839373                |

## 2e,syn(N-O)

|   |             |             |             |
|---|-------------|-------------|-------------|
| C | -3.79116400 | -1.32230100 | -1.52886800 |
| C | -2.76682700 | -1.74631100 | -0.69473900 |

|   |             |             |             |
|---|-------------|-------------|-------------|
| C | -1.81100900 | -0.83022600 | -0.22974200 |
| C | -1.86601400 | 0.53246100  | -0.60636200 |
| C | -2.92135500 | 0.94012900  | -1.43668200 |
| C | -3.86818800 | 0.02462300  | -1.89438700 |
| C | 0.01414900  | 1.10923100  | 0.85990600  |
| C | 0.08008500  | -0.34056000 | 1.37193300  |
| C | 0.83462500  | 3.31139900  | 1.02632900  |
| C | 0.47459800  | 3.46891200  | -0.44895400 |
| C | -0.86217900 | 2.78726700  | -0.72084700 |
| H | -4.52926800 | -2.03397800 | -1.88540400 |
| H | -2.67208700 | -2.77730200 | -0.37833200 |
| H | -3.01947200 | 1.97993900  | -1.72093500 |
| H | -4.67230400 | 0.37355200  | -2.53558300 |
| H | 0.13025000  | 3.87319100  | 1.65839700  |
| H | 1.25534100  | 3.00295900  | -1.06171100 |
| H | -1.02867600 | 2.70580600  | -1.79916300 |
| N | -0.77985600 | -1.27023300 | 0.59638400  |
| N | -0.88898500 | 1.42722100  | -0.15454100 |
| N | 0.82186200  | 1.91518600  | 1.43501400  |
| O | -0.72446300 | -2.51121800 | 0.95234100  |
| H | -1.68893000 | 3.37451900  | -0.29777700 |
| H | 0.40689100  | 4.52264000  | -0.74106000 |
| H | 1.83008100  | 3.71911900  | 1.23354100  |
| C | 1.53379400  | -0.86110800 | 1.40454900  |
| H | 2.05958200  | -0.19592100 | 2.09092000  |
| H | 1.51093400  | -1.85707500 | 1.84583400  |
| C | 2.21689800  | -0.89016100 | 0.05189400  |
| C | 3.10141900  | 0.13182400  | -0.32219500 |
| C | 1.99611200  | -1.94452200 | -0.84693700 |
| C | 3.74249000  | 0.10699100  | -1.56196500 |
| H | 3.28869600  | 0.94727700  | 0.37100200  |
| C | 2.63378100  | -1.96942000 | -2.08804600 |
| H | 1.32121300  | -2.74866400 | -0.56730100 |
| C | 3.50797200  | -0.94319000 | -2.45111600 |
| H | 4.43145500  | 0.90447100  | -1.82943900 |
| H | 2.45157900  | -2.79639200 | -2.76970500 |
| H | 4.00854000  | -0.96608600 | -3.41567400 |
| O | -0.50366400 | -0.24836400 | 2.67647100  |
| O | -0.26804600 | -1.46369300 | 3.43566200  |
| H | -0.68070100 | -2.13729100 | 2.84596600  |

|                                              |                             |
|----------------------------------------------|-----------------------------|
| Zero-point correction=                       | 0.340112 (Hartree/Particle) |
| Thermal correction to Energy=                | 0.359131                    |
| Thermal correction to Enthalpy=              | 0.360075                    |
| Thermal correction to Gibbs Free Energy=     | 0.292486                    |
| Sum of electronic and zero-point Energies=   | -1085.788521                |
| Sum of electronic and thermal Energies=      | -1085.769503                |
| Sum of electronic and thermal Enthalpies=    | -1085.768558                |
| Sum of electronic and thermal Free Energies= | -1085.836147                |

**2e,anti(amid)**

|   |             |             |             |
|---|-------------|-------------|-------------|
| C | -0.21100200 | 4.11023900  | 0.17056600  |
| C | 0.11046800  | 3.05911800  | 1.01887400  |
| C | -0.30682500 | 1.75508700  | 0.71714000  |
| C | -1.07055800 | 1.49417400  | -0.44150300 |
| C | -1.36430100 | 2.56590200  | -1.29562500 |
| C | -0.94269500 | 3.86035600  | -0.99213900 |
| C | -1.06033300 | -0.90574200 | -0.00169500 |
| C | -0.22725200 | -0.70359800 | 1.27736300  |
| C | -2.21629500 | -2.45563000 | -1.37340600 |
| C | -3.22999100 | -1.34420100 | -1.62843000 |
| C | -2.49711300 | -0.01658400 | -1.79350400 |
| H | 0.11511700  | 5.11735300  | 0.41136300  |
| H | 0.68451100  | 3.20692100  | 1.92466500  |
| H | -1.91396100 | 2.39695500  | -2.21307200 |
| H | -1.18697200 | 4.66974800  | -1.67362200 |
| H | -1.59692500 | -2.62052300 | -2.26793500 |
| H | -3.92081700 | -1.28037800 | -0.77931100 |
| H | -3.21199200 | 0.81007800  | -1.75876200 |
| N | 0.05487100  | 0.71039700  | 1.57355200  |
| N | -1.51905600 | 0.18760500  | -0.70964300 |
| N | -1.34425400 | -2.14044700 | -0.24747700 |
| O | 0.74935800  | 0.94593300  | 2.62184300  |
| H | -1.98180400 | 0.02626800  | -2.76252200 |
| H | -3.82684600 | -1.54003200 | -2.52582600 |
| H | -2.71825600 | -3.40545400 | -1.16205200 |
| C | 1.09552300  | -1.50343500 | 1.27078500  |
| H | 1.54390000  | -1.33163200 | 2.25210600  |
| H | 0.83486300  | -2.55804700 | 1.19936500  |
| C | 2.04570900  | -1.11056000 | 0.15868800  |
| C | 2.92246900  | -0.02564200 | 0.30830500  |
| C | 2.07706200  | -1.83429500 | -1.04209000 |
| C | 3.80072900  | 0.32841900  | -0.71637200 |
| H | 2.91318000  | 0.54024000  | 1.23605100  |
| C | 2.95548600  | -1.48233500 | -2.06793000 |
| H | 1.41000600  | -2.68365100 | -1.16550900 |
| C | 3.81979300  | -0.39795100 | -1.90861300 |
| H | 4.47503400  | 1.17006500  | -0.58027500 |
| H | 2.97013800  | -2.06059300 | -2.98851900 |
| H | 4.50781500  | -0.12504100 | -2.70456400 |
| O | -1.08757500 | -1.07955800 | 2.37467700  |
| O | -1.18112100 | -2.52337200 | 2.46975600  |
| H | -1.48846100 | -2.73912200 | 1.55070100  |

|                                            |                             |
|--------------------------------------------|-----------------------------|
| Zero-point correction=                     | 0.340189 (Hartree/Particle) |
| Thermal correction to Energy=              | 0.359206                    |
| Thermal correction to Enthalpy=            | 0.360150                    |
| Thermal correction to Gibbs Free Energy=   | 0.292398                    |
| Sum of electronic and zero-point Energies= | -1085.788083                |
| Sum of electronic and thermal Energies=    | -1085.769066                |

Sum of electronic and thermal Enthalpies= -1085.768122  
Sum of electronic and thermal Free Energies= -1085.835874

**2e,syn(amid)**

|   |             |             |             |
|---|-------------|-------------|-------------|
| C | -4.00392900 | -1.52648700 | -0.30506600 |
| C | -3.00080900 | -1.44547700 | 0.65191300  |
| C | -1.91311700 | -0.58271000 | 0.46217400  |
| C | -1.81423300 | 0.20774200  | -0.70383400 |
| C | -2.84105200 | 0.11619000  | -1.65381400 |
| C | -3.92274800 | -0.74256800 | -1.45756200 |
| C | 0.17662300  | 1.33148800  | 0.14196100  |
| C | 0.17973200  | 0.46017600  | 1.40950300  |
| C | 1.11038600  | 3.19022200  | -0.98312400 |
| C | 0.78719500  | 2.44715400  | -2.27716000 |
| C | -0.58620700 | 1.79587000  | -2.15451200 |
| H | -4.84559300 | -2.19444800 | -0.15024300 |
| H | -3.02341800 | -2.03565400 | 1.55924000  |
| H | -2.81034100 | 0.72104200  | -2.55110700 |
| H | -4.70307900 | -0.79007800 | -2.21130100 |
| H | 0.41206300  | 4.02876600  | -0.83817300 |
| H | 1.54710800  | 1.67595100  | -2.44886900 |
| H | -0.73992200 | 1.08132300  | -2.96935600 |
| N | -0.89939500 | -0.54047100 | 1.42574300  |
| N | -0.71331000 | 1.06455100  | -0.88178000 |
| N | 1.03675200  | 2.29095200  | 0.16226000  |
| O | -0.90770900 | -1.36344500 | 2.40555200  |
| H | -1.37996700 | 2.55255800  | -2.21809200 |
| H | 0.79078200  | 3.11885200  | -3.14225600 |
| H | 2.11683400  | 3.62056500  | -1.01583700 |
| C | 1.53969500  | -0.24208700 | 1.63271500  |
| H | 2.27356700  | 0.54003600  | 1.82076500  |
| H | 1.42121300  | -0.82245500 | 2.55061800  |
| C | 1.97592600  | -1.12041900 | 0.47874000  |
| C | 2.91362600  | -0.65432000 | -0.45432300 |
| C | 1.46385100  | -2.41700600 | 0.31990800  |
| C | 3.32341700  | -1.45527500 | -1.52174800 |
| H | 3.32901200  | 0.34304600  | -0.33391800 |
| C | 1.87128100  | -3.21899800 | -0.74706100 |
| H | 0.74592300  | -2.79721000 | 1.04149800  |
| C | 2.80028100  | -2.74060100 | -1.67300300 |
| H | 4.05837200  | -1.07870300 | -2.22900100 |
| H | 1.46601500  | -4.22226600 | -0.85094900 |
| H | 3.12092700  | -3.36802800 | -2.50059600 |
| O | -0.18089700 | 1.31448700  | 2.51615900  |
| O | 0.93654100  | 2.16048300  | 2.89362000  |
| H | 1.10919700  | 2.61191400  | 2.02713000  |

Zero-point correction= 0.340761 (Hartree/Particle)  
Thermal correction to Energy= 0.359714

|                                              |              |
|----------------------------------------------|--------------|
| Thermal correction to Enthalpy=              | 0.360659     |
| Thermal correction to Gibbs Free Energy=     | 0.293374     |
| Sum of electronic and zero-point Energies=   | -1085.789082 |
| Sum of electronic and thermal Energies=      | -1085.770129 |
| Sum of electronic and thermal Enthalpies=    | -1085.769184 |
| Sum of electronic and thermal Free Energies= | -1085.836469 |

### 3a

|   |             |             |             |
|---|-------------|-------------|-------------|
| C | -0.86793000 | 4.15230400  | -1.11925000 |
| C | -0.65488400 | 2.85723600  | -1.57891900 |
| C | -0.46791700 | 1.80906900  | -0.66732100 |
| C | -0.48710200 | 2.06853300  | 0.72397000  |
| C | -0.70534400 | 3.37664600  | 1.17122900  |
| C | -0.89452600 | 4.41098300  | 0.25464500  |
| C | -0.02584000 | -0.28991200 | 1.18960300  |
| C | -0.30886600 | -0.69728600 | -0.24741000 |
| C | 0.41021600  | -0.34825900 | 3.36409900  |
| C | 0.02979100  | 1.12317900  | 3.02467900  |
| H | -1.01441900 | 4.95828100  | -1.83182400 |
| H | -0.62126000 | 2.62285200  | -2.63553000 |
| H | -0.72440800 | 3.58143900  | 2.23647100  |
| H | -1.06130000 | 5.42052400  | 0.61879900  |
| H | -0.28631900 | -0.79092400 | 4.08510000  |
| H | 0.85124300  | 1.83128800  | 3.18912500  |
| N | -0.22597700 | 0.50794000  | -1.13094700 |
| N | -0.26763900 | 1.01347600  | 1.59350600  |
| N | 0.35193400  | -1.10582900 | 2.10283500  |
| O | -0.14162800 | 0.29423100  | -2.39328200 |
| C | -1.73750400 | -1.30011600 | -0.33368300 |
| C | -2.64853100 | -0.90034400 | -1.31935900 |
| C | -2.11957800 | -2.30044800 | 0.57290500  |
| C | -3.91568700 | -1.48327100 | -1.38910600 |
| H | -2.36983600 | -0.14804800 | -2.04730500 |
| C | -3.38390600 | -2.88336700 | 0.49585100  |
| H | -1.42612000 | -2.61079200 | 1.34784700  |
| C | -4.28999900 | -2.47520000 | -0.48417300 |
| H | -4.60872400 | -1.15746800 | -2.16028900 |
| H | -3.66021600 | -3.65651800 | 1.20812400  |
| H | -5.27669000 | -2.92703200 | -0.54194300 |
| H | -0.84647800 | 1.47811600  | 3.57900900  |
| H | 1.41516900  | -0.42526000 | 3.79312700  |
| C | 0.73347400  | -1.75221000 | -0.73874300 |
| H | 0.57098400  | -2.64226900 | -0.12718600 |
| H | 0.45203100  | -1.99783600 | -1.76506300 |
| C | 2.19578200  | -1.34870500 | -0.67195000 |
| C | 2.78426800  | -0.56856100 | -1.67872100 |
| C | 3.00392800  | -1.79176300 | 0.38574000  |
| C | 4.13836200  | -0.23483800 | -1.62291500 |

|   |            |             |             |
|---|------------|-------------|-------------|
| H | 2.17368200 | -0.22190200 | -2.50652300 |
| C | 4.35867900 | -1.46210100 | 0.44033400  |
| H | 2.55882300 | -2.39240600 | 1.17313400  |
| C | 4.93124300 | -0.67981100 | -0.56392200 |
| H | 4.57522800 | 0.36926500  | -2.41426200 |
| H | 4.96756400 | -1.82094200 | 1.26664300  |
| H | 5.98706300 | -0.42386600 | -0.52445100 |

|                                              |                             |
|----------------------------------------------|-----------------------------|
| Zero-point correction=                       | 0.383550 (Hartree/Particle) |
| Thermal correction to Energy=                | 0.404435                    |
| Thermal correction to Enthalpy=              | 0.405379                    |
| Thermal correction to Gibbs Free Energy=     | 0.332909                    |
| Sum of electronic and zero-point Energies=   | -1127.114621                |
| Sum of electronic and thermal Energies=      | -1127.093736                |
| Sum of electronic and thermal Enthalpies=    | -1127.092792                |
| Sum of electronic and thermal Free Energies= | -1127.165262                |

### 3b

|   |             |             |             |
|---|-------------|-------------|-------------|
| C | -4.11026100 | 1.10888500  | 0.93487900  |
| C | -2.82589800 | 1.03541000  | 1.46349000  |
| C | -1.84285500 | 0.27997700  | 0.81225800  |
| C | -2.15490300 | -0.41985700 | -0.37485300 |
| C | -3.45029000 | -0.33311400 | -0.89817200 |
| C | -4.42034900 | 0.42701600  | -0.24611300 |
| C | 0.10930500  | -1.32469200 | -0.41428200 |
| C | 0.61600800  | -0.18981200 | 0.47572600  |
| C | -0.04832400 | -3.10799200 | -1.72388500 |
| C | -1.41669600 | -2.37012000 | -1.81285400 |
| H | -4.86693400 | 1.70037600  | 1.44106800  |
| H | -2.55466000 | 1.54443100  | 2.38004200  |
| H | -3.69384100 | -0.86407300 | -1.81258900 |
| H | -5.42132600 | 0.48388700  | -0.66370100 |
| H | 0.45753100  | -3.14675700 | -2.69451600 |
| H | -2.25246300 | -2.95926700 | -1.41583600 |
| N | -0.54773800 | 0.17645600  | 1.36251700  |
| N | -1.16863400 | -1.20441300 | -0.95362800 |
| N | 0.78533000  | -2.34459300 | -0.78156100 |
| O | -0.33449000 | 0.67777600  | 2.52179600  |
| C | 0.96167200  | 1.02699000  | -0.41602200 |
| C | 1.62382200  | 0.84049600  | -1.63755900 |
| C | 0.64448200  | 2.32974000  | -0.00771300 |
| C | 1.96179700  | 1.93639200  | -2.43200500 |
| H | 1.88838900  | -0.15962700 | -1.96327700 |
| C | 0.98123100  | 3.42214100  | -0.80743700 |
| H | 0.14275300  | 2.49468200  | 0.93970700  |
| C | 1.63928100  | 3.23032900  | -2.02258700 |
| H | 2.47932800  | 1.77307800  | -3.37326600 |
| H | 0.72651500  | 4.42503300  | -0.47562400 |

|   |             |             |             |
|---|-------------|-------------|-------------|
| H | 1.89978600  | 4.08243800  | -2.64447900 |
| H | -1.66835700 | -2.05953700 | -2.83257400 |
| H | -0.15158300 | -4.13977200 | -1.37142500 |
| C | 1.86545500  | -0.65343700 | 1.35602900  |
| C | 2.52829900  | 0.50795300  | 2.15275200  |
| C | 1.48787800  | -1.80280500 | 2.32283000  |
| H | 2.82526700  | 1.32414600  | 1.49070100  |
| H | 1.84684400  | 0.88825400  | 2.91038800  |
| H | 3.43077500  | 0.12025400  | 2.63482500  |
| H | 1.09974700  | -2.66592500 | 1.77932300  |
| H | 2.38007800  | -2.11840600 | 2.87201600  |
| H | 0.74544800  | -1.44962700 | 3.04113600  |
| C | 2.94559100  | -1.12628100 | 0.45807000  |
| N | 3.90120600  | -1.42732200 | -0.12898500 |

|                                              |                             |
|----------------------------------------------|-----------------------------|
| Zero-point correction=                       | 0.356976 (Hartree/Particle) |
| Thermal correction to Energy=                | 0.377817                    |
| Thermal correction to Enthalpy=              | 0.378761                    |
| Thermal correction to Gibbs Free Energy=     | 0.308332                    |
| Sum of electronic and zero-point Energies=   | -1066.971189                |
| Sum of electronic and thermal Energies=      | -1066.950347                |
| Sum of electronic and thermal Enthalpies=    | -1066.949403                |
| Sum of electronic and thermal Free Energies= | -1067.019832                |

### 3c,(N-O)

|   |             |             |             |
|---|-------------|-------------|-------------|
| C | -3.50754000 | -2.05229400 | -0.36331800 |
| C | -2.37136600 | -2.01182600 | 0.43678600  |
| C | -1.54332100 | -0.88086500 | 0.41899500  |
| C | -1.86212200 | 0.23041300  | -0.40229600 |
| C | -3.00821800 | 0.16880400  | -1.20395900 |
| C | -3.82279000 | -0.96361200 | -1.18346800 |
| C | 0.07397100  | 1.46617000  | 0.46153200  |
| C | 0.67675600  | 0.20019600  | 1.04491400  |
| C | -0.25622500 | 3.54376700  | -0.21391700 |
| C | -1.39408900 | 2.68626700  | -0.84605800 |
| H | -4.14494300 | -2.93100500 | -0.34963400 |
| H | -2.09899800 | -2.83188300 | 1.09027800  |
| H | -3.26094000 | 1.01024800  | -1.84048800 |
| H | -4.70834900 | -0.99164700 | -1.81160600 |
| H | -0.64759600 | 4.34798800  | 0.41841500  |
| H | -1.39882900 | 2.71965000  | -1.94129400 |
| N | -0.41151100 | -0.81810600 | 1.23313500  |
| N | -1.04028100 | 1.34566700  | -0.36363000 |
| N | 0.57059400  | 2.63402500  | 0.59796200  |
| O | -0.13142200 | -1.75043500 | 2.06908300  |
| C | 1.76281400  | -0.35783000 | 0.10201300  |
| C | 1.68000600  | -1.61839400 | -0.49603800 |
| C | 2.89334600  | 0.44050200  | -0.12405800 |

|   |             |             |             |
|---|-------------|-------------|-------------|
| C | 2.71507800  | -2.07369700 | -1.31723400 |
| H | 0.82334500  | -2.25807500 | -0.31528200 |
| C | 3.92248600  | -0.01750800 | -0.94298600 |
| H | 2.95121200  | 1.41751500  | 0.34506200  |
| C | 3.83551300  | -1.27641900 | -1.54428700 |
| H | 2.64203400  | -3.05681600 | -1.77446200 |
| H | 4.79485500  | 0.60844400  | -1.11121400 |
| H | 4.63896800  | -1.63289500 | -2.18344900 |
| H | -2.39310000 | 2.96481100  | -0.48876700 |
| H | 0.37270400  | 4.01016400  | -0.98035700 |
| O | 1.19746500  | 0.49658400  | 2.30381300  |
| H | 1.30388100  | -0.37884500 | 2.72763700  |

|                                              |                             |
|----------------------------------------------|-----------------------------|
| Zero-point correction=                       | 0.278110 (Hartree/Particle) |
| Thermal correction to Energy=                | 0.294183                    |
| Thermal correction to Enthalpy=              | 0.295127                    |
| Thermal correction to Gibbs Free Energy=     | 0.233846                    |
| Sum of electronic and zero-point Energies=   | -932.150976                 |
| Sum of electronic and thermal Energies=      | -932.134904                 |
| Sum of electronic and thermal Enthalpies=    | -932.133959                 |
| Sum of electronic and thermal Free Energies= | -932.195241                 |

### 3c,(amid)

|   |             |             |             |
|---|-------------|-------------|-------------|
| C | -2.99341900 | -2.65953100 | -0.19391800 |
| C | -1.85571600 | -2.36161000 | 0.54841100  |
| C | -1.28286000 | -1.08488100 | 0.47698600  |
| C | -1.86367200 | -0.09828400 | -0.35631200 |
| C | -3.00369900 | -0.41376700 | -1.10014100 |
| C | -3.56856800 | -1.68720800 | -1.01728400 |
| C | -0.19718400 | 1.50389500  | 0.38324100  |
| C | 0.70072200  | 0.42561700  | 0.96069700  |
| C | -1.02472400 | 3.49065500  | -0.11870800 |
| C | -1.99851000 | 2.42453500  | -0.71062400 |
| H | -3.42961300 | -3.65198400 | -0.13227700 |
| H | -1.38772600 | -3.08903900 | 1.20036400  |
| H | -3.44661800 | 0.34018300  | -1.74333900 |
| H | -4.45633100 | -1.91589200 | -1.59942700 |
| H | -1.53013500 | 4.18363600  | 0.56167500  |
| H | -2.14737000 | 2.53610900  | -1.78905100 |
| N | -0.15817800 | -0.77694200 | 1.26247500  |
| N | -1.28395600 | 1.17398600  | -0.39808400 |
| N | 0.02199000  | 2.74537400  | 0.60305400  |
| O | 0.32209200  | -1.63130700 | 2.07584300  |
| C | 1.82186100  | -0.01303500 | 0.00977900  |
| C | 1.69756100  | 0.06591100  | -1.38132800 |
| C | 2.98586900  | -0.55481700 | 0.56862200  |
| C | 2.73186900  | -0.38097400 | -2.20594200 |
| H | 0.79930300  | 0.47976500  | -1.82981100 |



|   |             |             |             |
|---|-------------|-------------|-------------|
| C | 4.01296600  | -1.00635400 | -0.25816100 |
| H | 3.07409900  | -0.61246400 | 1.64713300  |
| C | 3.89101500  | -0.91874400 | -1.64704700 |
| H | 2.62884600  | -0.30642800 | -3.28529100 |
| H | 4.91314700  | -1.42491200 | 0.18412500  |
| H | 4.69564300  | -1.26704700 | -2.28922700 |
| H | -2.98181600 | 2.42164000  | -0.22409700 |
| H | -0.55684300 | 4.09033000  | -0.90769300 |
| O | 1.21565000  | 0.87854500  | 2.17914400  |
| H | 1.14341000  | 1.85282100  | 2.14528300  |

|                                              |                             |
|----------------------------------------------|-----------------------------|
| Zero-point correction=                       | 0.278277 (Hartree/Particle) |
| Thermal correction to Energy=                | 0.294320                    |
| Thermal correction to Enthalpy=              | 0.295264                    |
| Thermal correction to Gibbs Free Energy=     | 0.234037                    |
| Sum of electronic and zero-point Energies=   | -932.148607                 |
| Sum of electronic and thermal Energies=      | -932.132564                 |
| Sum of electronic and thermal Enthalpies=    | -932.131620                 |
| Sum of electronic and thermal Free Energies= | -932.192848                 |

### 3d

|   |             |             |             |
|---|-------------|-------------|-------------|
| C | -3.99530100 | 0.56631100  | -1.87364200 |
| C | -2.60840900 | 0.65224300  | -1.94096400 |
| C | -1.81486200 | -0.00190000 | -0.99072800 |
| C | -2.42329400 | -0.76070600 | 0.03636700  |
| C | -3.82072900 | -0.83555700 | 0.09389700  |
| C | -4.60046600 | -0.17615600 | -0.85537300 |
| C | -0.22351000 | -1.40293800 | 0.89387900  |
| C | 0.47277200  | -0.33923100 | 0.04556900  |
| C | -0.63735400 | -3.00246800 | 2.35950700  |
| C | -2.02154800 | -2.49798000 | 1.84956000  |
| H | -4.60205700 | 1.07851300  | -2.61414800 |
| H | -2.10700600 | 1.21029100  | -2.72185300 |
| H | -4.29229700 | -1.41307700 | 0.88218500  |
| H | -5.68276000 | -0.24620000 | -0.79702800 |
| H | -0.49447800 | -4.07372300 | 2.18125700  |
| H | -2.65868400 | -2.11016000 | 2.65220600  |
| N | -0.40902100 | 0.05821400  | -1.08752200 |
| N | -1.60969900 | -1.42244500 | 0.94098500  |
| N | 0.39422100  | -2.23901900 | 1.63741500  |
| O | 0.12734000  | 0.69255000  | -2.06299700 |
| C | 1.82594100  | -0.83472900 | -0.45108800 |
| C | 1.93635400  | -1.55868600 | -1.64277700 |
| C | 2.95543200  | -0.65411100 | 0.35092900  |
| C | 3.16798200  | -2.08231200 | -2.03356400 |
| H | 1.06834900  | -1.70365200 | -2.27662100 |
| C | 4.18695600  | -1.17505600 | -0.04452800 |

|   |             |             |             |
|---|-------------|-------------|-------------|
| H | 2.86623500  | -0.10280100 | 1.27880400  |
| C | 4.29793600  | -1.89002000 | -1.23736200 |
| H | 3.24321700  | -2.63689200 | -2.96510700 |
| H | 5.06001100  | -1.02277800 | 0.58446900  |
| H | 5.25837200  | -2.29544000 | -1.54496500 |
| H | -2.58629500 | -3.26264300 | 1.30141900  |
| H | -0.51595200 | -2.83410100 | 3.43544600  |
| O | 0.56553000  | 0.73701400  | 0.98350400  |
| O | 1.31948500  | 1.83103800  | 0.35444800  |
| C | 0.74416800  | 3.09287300  | 0.77452200  |
| C | -0.69408000 | 3.23658600  | 0.26957100  |
| C | 0.83462100  | 3.23343300  | 2.29854500  |
| C | 1.67992300  | 4.08285800  | 0.06700300  |
| H | -0.73213000 | 3.07600400  | -0.81180800 |
| H | -1.35367600 | 2.51062200  | 0.75226500  |
| H | -1.07279500 | 4.24088100  | 0.49054500  |
| H | 1.87001200  | 3.11056900  | 2.63307900  |
| H | 0.48416800  | 4.22369900  | 2.61057000  |
| H | 0.21814700  | 2.47974300  | 2.79641100  |
| H | 1.37278600  | 5.10816600  | 0.29864200  |
| H | 2.71344300  | 3.94518200  | 0.39970700  |
| H | 1.64085200  | 3.94099900  | -1.01718800 |

|                                              |                             |
|----------------------------------------------|-----------------------------|
| Zero-point correction=                       | 0.392267 (Hartree/Particle) |
| Thermal correction to Energy=                | 0.415366                    |
| Thermal correction to Enthalpy=              | 0.416310                    |
| Thermal correction to Gibbs Free Energy=     | 0.339918                    |
| Sum of electronic and zero-point Energies=   | -1164.320876                |
| Sum of electronic and thermal Energies=      | -1164.297777                |
| Sum of electronic and thermal Enthalpies=    | -1164.296833                |
| Sum of electronic and thermal Free Energies= | -1164.373225                |

### 3e,(N-O)

|   |             |             |             |
|---|-------------|-------------|-------------|
| C | -3.42402100 | -2.23894000 | -0.37653900 |
| C | -2.29789700 | -2.08724900 | 0.42443600  |
| C | -1.52031500 | -0.92598100 | 0.32608600  |
| C | -1.88492600 | 0.10651000  | -0.57289000 |
| C | -3.02136200 | -0.06367000 | -1.37334100 |
| C | -3.78202400 | -1.22832900 | -1.27552500 |
| C | 0.01495400  | 1.46112800  | 0.17785100  |
| C | 0.67132000  | 0.25088600  | 0.83094800  |
| C | -0.39259600 | 3.47920500  | -0.62598100 |
| C | -1.50952800 | 2.54655400  | -1.18604600 |
| H | -4.02033500 | -3.14298600 | -0.30187200 |
| H | -1.99604400 | -2.84296900 | 1.13958100  |
| H | -3.30928000 | 0.72022000  | -2.06594900 |
| H | -4.66044200 | -1.34285700 | -1.90387400 |
| H | -0.80237600 | 4.29432300  | -0.01972200 |

|   |             |             |             |
|---|-------------|-------------|-------------|
| H | -1.51213400 | 2.49092700  | -2.28080500 |
| N | -0.40103400 | -0.75248300 | 1.15065400  |
| N | -1.12091100 | 1.25967800  | -0.59827300 |
| N | 0.49021500  | 2.64567200  | 0.20920700  |
| O | -0.17766400 | -1.55007300 | 2.12993500  |
| C | 1.75795900  | -0.35914000 | -0.06694300 |
| C | 2.69855100  | 0.48844200  | -0.66669100 |
| C | 1.85930000  | -1.74352000 | -0.24356300 |
| C | 3.72066700  | -0.04690900 | -1.44910600 |
| H | 2.62459500  | 1.55961000  | -0.51081400 |
| C | 2.87984500  | -2.27193400 | -1.03463300 |
| H | 1.15659500  | -2.40908600 | 0.24435700  |
| C | 3.81016300  | -1.42693700 | -1.64073100 |
| H | 4.44779200  | 0.61676800  | -1.90905600 |
| H | 2.94839600  | -3.34764200 | -1.17116100 |
| H | 4.60414900  | -1.84204800 | -2.25581200 |
| H | -2.51556900 | 2.82830000  | -0.85305200 |
| H | 0.19636500  | 3.93556200  | -1.42886800 |
| O | 1.34909000  | 0.58023300  | 2.01328300  |
| O | 0.38311200  | 1.04458100  | 2.99727000  |
| H | 0.14355500  | 0.17319200  | 3.37804200  |

|                                              |                             |
|----------------------------------------------|-----------------------------|
| Zero-point correction=                       | 0.281438 (Hartree/Particle) |
| Thermal correction to Energy=                | 0.298534                    |
| Thermal correction to Enthalpy=              | 0.299478                    |
| Thermal correction to Gibbs Free Energy=     | 0.236031                    |
| Sum of electronic and zero-point Energies=   | -1007.247117                |
| Sum of electronic and thermal Energies=      | -1007.230021                |
| Sum of electronic and thermal Enthalpies=    | -1007.229077                |
| Sum of electronic and thermal Free Energies= | -1007.292524                |

### 3e,(amid)

|   |             |             |             |
|---|-------------|-------------|-------------|
| C | 3.51187300  | -2.40218800 | 0.03418500  |
| C | 2.25522600  | -2.26645900 | -0.54586500 |
| C | 1.54577500  | -1.06586000 | -0.41278200 |
| C | 2.10708400  | 0.00707900  | 0.31647900  |
| C | 3.36995600  | -0.14410000 | 0.89715500  |
| C | 4.07011300  | -1.34211200 | 0.75421300  |
| C | 0.15546400  | 1.38305400  | -0.17266000 |
| C | -0.63587000 | 0.21286000  | -0.74569400 |
| C | 0.75388300  | 3.44873200  | 0.38352600  |
| C | 1.92807900  | 2.50697700  | 0.78723200  |
| H | 4.05435200  | -3.33631500 | -0.07436300 |
| H | 1.79532200  | -3.06666900 | -1.11207800 |
| H | 3.80107500  | 0.67675900  | 1.46093300  |
| H | 5.05085900  | -1.44370500 | 1.20917900  |
| H | 1.06819500  | 4.22147900  | -0.32558200 |
| H | 2.16320700  | 2.55069000  | 1.85569100  |

|   |             |             |             |
|---|-------------|-------------|-------------|
| N | 0.28511700  | -0.93479000 | -1.02407500 |
| N | 1.38087100  | 1.19068500  | 0.42403700  |
| N | -0.27322400 | 2.59246400  | -0.23442600 |
| O | -0.20441400 | -1.90028700 | -1.69819500 |
| C | -1.77751800 | -0.25828100 | 0.14823200  |
| C | -1.73926100 | -0.06508900 | 1.53195400  |
| C | -2.83697700 | -0.97270900 | -0.42347600 |
| C | -2.75629800 | -0.57439600 | 2.34148400  |
| H | -0.91979800 | 0.48354800  | 1.98795200  |
| C | -3.85062300 | -1.47786800 | 0.38736400  |
| H | -2.85844600 | -1.11862000 | -1.49638600 |
| C | -3.81398000 | -1.28117000 | 1.77035800  |
| H | -2.71976000 | -0.41575300 | 3.41586500  |
| H | -4.67428000 | -2.02517800 | -0.06292300 |
| H | -4.60785200 | -1.67624300 | 2.39868400  |
| H | 2.84856200  | 2.69796200  | 0.22264500  |
| H | 0.32424600  | 3.95786400  | 1.25318400  |
| O | -1.06057100 | 0.58817700  | -2.06123400 |
| O | -2.13018200 | 1.56017700  | -1.94704000 |
| H | -1.63524700 | 2.32032700  | -1.55002500 |

|                                              |                             |
|----------------------------------------------|-----------------------------|
| Zero-point correction=                       | 0.281840 (Hartree/Particle) |
| Thermal correction to Energy=                | 0.298834                    |
| Thermal correction to Enthalpy=              | 0.299779                    |
| Thermal correction to Gibbs Free Energy=     | 0.236752                    |
| Sum of electronic and zero-point Energies=   | -1007.243132                |
| Sum of electronic and thermal Energies=      | -1007.226137                |
| Sum of electronic and thermal Enthalpies=    | -1007.225193                |
| Sum of electronic and thermal Free Energies= | -1007.288220                |

#### 4a

|   |             |             |             |
|---|-------------|-------------|-------------|
| C | -3.93630400 | -0.21571000 | -2.79932400 |
| C | -2.73651700 | -0.80710400 | -2.41590300 |
| C | -2.27724000 | -0.66902900 | -1.10090200 |
| C | -3.03851900 | 0.05576200  | -0.15437400 |
| C | -4.24164100 | 0.64762500  | -0.55418300 |
| C | -4.68540300 | 0.51260500  | -1.87009400 |
| C | -1.36976800 | -0.43473500 | 1.56605700  |
| C | -0.32915700 | -0.78529100 | 0.50765200  |
| C | -2.40859900 | 0.00350200  | 3.47698500  |
| C | -3.36925500 | 0.45288600  | 2.33530100  |
| H | -4.28482100 | -0.32043500 | -3.82229200 |
| H | -2.13643600 | -1.38706800 | -3.10648100 |
| H | -4.82977100 | 1.20576400  | 0.16705200  |
| H | -5.62180200 | 0.97669400  | -2.16586900 |
| H | -2.85275500 | -0.77600700 | 4.10638700  |
| H | -3.59003200 | 1.52659200  | 2.36133700  |
| N | -1.08916900 | -1.29558300 | -0.68577200 |

|   |             |             |             |
|---|-------------|-------------|-------------|
| N | -2.57596700 | 0.11042400  | 1.15152100  |
| N | -1.19134900 | -0.52125000 | 2.83262300  |
| O | -0.51401800 | -2.13432800 | -1.46309800 |
| C | 0.43894200  | 0.49012700  | 0.10493400  |
| C | 0.73738000  | 1.47930100  | 1.04484700  |
| C | 0.90167400  | 0.66263800  | -1.20997900 |
| C | 1.46772500  | 2.61899100  | 0.69655700  |
| H | 0.40749000  | 1.36266200  | 2.07252000  |
| C | 1.62393200  | 1.79150300  | -1.56910700 |
| H | 0.70316000  | -0.09906400 | -1.95611200 |
| C | 1.91179300  | 2.78204200  | -0.61933400 |
| H | 1.67792900  | 3.36386800  | 1.45565500  |
| H | 1.98089200  | 1.92683500  | -2.58522000 |
| H | -4.32079300 | -0.09223000 | 2.32791500  |
| H | -2.14178400 | 0.83674700  | 4.13597800  |
| C | 0.59807300  | -1.91911300 | 1.06205700  |
| H | 0.05546500  | -2.86202700 | 0.94465300  |
| H | 0.66612000  | -1.72408700 | 2.13521200  |
| C | 2.00191100  | -2.04971600 | 0.50141700  |
| C | 2.30047300  | -2.92660900 | -0.55017300 |
| C | 3.05591400  | -1.33487400 | 1.08856900  |
| C | 3.61084200  | -3.07567900 | -1.00629700 |
| H | 1.49618500  | -3.48525600 | -1.01568800 |
| C | 4.36609100  | -1.47558900 | 0.63054500  |
| H | 2.84665500  | -0.65999500 | 1.91481000  |
| C | 4.64864500  | -2.34846600 | -0.42089500 |
| H | 3.82061100  | -3.76385100 | -1.82149100 |
| H | 5.16602500  | -0.90891300 | 1.10060300  |
| H | 5.66901600  | -2.46495000 | -0.77732600 |
| O | 2.62243000  | 3.85454100  | -1.07483500 |
| C | 2.94533800  | 4.88442700  | -0.15492800 |
| H | 3.56940300  | 4.51062600  | 0.66772200  |
| H | 3.50634300  | 5.62875500  | -0.72309300 |
| H | 2.04301700  | 5.35153700  | 0.26202300  |

Zero-point correction= 0.416073 (Hartree/Particle)  
 Thermal correction to Energy= 0.439657  
 Thermal correction to Enthalpy= 0.440601  
 Thermal correction to Gibbs Free Energy= 0.362031  
 Sum of electronic and zero-point Energies= -1241.560989  
 Sum of electronic and thermal Energies= -1241.537405  
 Sum of electronic and thermal Enthalpies= -1241.536461  
 Sum of electronic and thermal Free Energies= -1241.615032

#### 4b

|   |             |             |             |
|---|-------------|-------------|-------------|
| C | -2.19213500 | -3.29535100 | -1.87279400 |
| C | -1.64913800 | -2.03710300 | -2.11443500 |
| C | -1.54342000 | -1.11280000 | -1.06963300 |

|   |             |             |             |
|---|-------------|-------------|-------------|
| C | -1.99949300 | -1.44283100 | 0.22441700  |
| C | -2.54128900 | -2.71214900 | 0.45531500  |
| C | -2.63434500 | -3.63181600 | -0.58962500 |
| C | -1.36187400 | 0.78947500  | 1.02320100  |
| C | -0.41094200 | 0.96042400  | -0.16404000 |
| C | -2.50238900 | 1.01337600  | 2.91919000  |
| C | -2.71274900 | -0.45351100 | 2.44678100  |
| H | -2.26698600 | -4.01343200 | -2.68362400 |
| H | -1.30549800 | -1.73936800 | -3.09761800 |
| H | -2.89271700 | -2.97430900 | 1.44785200  |
| H | -3.05711100 | -4.61359800 | -0.39739900 |
| H | -2.03323400 | 1.06125900  | 3.90749300  |
| H | -3.76119800 | -0.69693000 | 2.23814700  |
| N | -1.03653900 | 0.17974900  | -1.30074000 |
| N | -1.93216800 | -0.46521200 | 1.20584200  |
| N | -1.62004900 | 1.65747600  | 1.93099800  |
| O | -0.83509800 | 0.56344000  | -2.50406400 |
| C | 0.94686000  | 0.30818600  | 0.17682200  |
| C | 1.43543200  | 0.27826900  | 1.49356400  |
| C | 1.73949100  | -0.24577200 | -0.83407100 |
| C | 2.67101000  | -0.28262300 | 1.78660800  |
| H | 0.84930200  | 0.70944700  | 2.29877200  |
| C | 2.98310700  | -0.81250600 | -0.55178300 |
| H | 1.39388100  | -0.23265700 | -1.86197100 |
| C | 3.45724500  | -0.83348000 | 0.76456600  |
| H | 3.05001700  | -0.30383600 | 2.80352700  |
| H | 3.56720000  | -1.22760700 | -1.36473300 |
| H | -2.32448400 | -1.19076200 | 3.15917000  |
| H | -3.44531900 | 1.56819700  | 2.98198700  |
| C | -0.25176800 | 2.47821900  | -0.61503600 |
| C | -1.60970500 | 3.10392500  | -1.01883800 |
| C | 0.41152500  | 3.34764000  | 0.49051100  |
| H | -2.07074500 | 2.55703300  | -1.84261600 |
| H | -2.28043200 | 3.11445200  | -0.15650100 |
| H | -1.44804000 | 4.13669700  | -1.34205500 |
| H | 1.39231600  | 2.95520700  | 0.76863400  |
| H | 0.55366200  | 4.35699600  | 0.09289600  |
| H | -0.22681400 | 3.38931600  | 1.37199600  |
| C | 0.67758400  | 2.57411400  | -1.76452500 |
| N | 1.45752600  | 2.79861400  | -2.59528800 |
| O | 4.65155600  | -1.36095800 | 1.15337300  |
| C | 5.50113200  | -1.91009300 | 0.15631700  |
| H | 6.39343000  | -2.25470000 | 0.68187300  |
| H | 5.02864900  | -2.76067700 | -0.35213000 |
| H | 5.78623900  | -1.15651900 | -0.58892800 |

|                                            |                             |
|--------------------------------------------|-----------------------------|
| Zero-point correction=                     | 0.389666 (Hartree/Particle) |
| Thermal correction to Energy=              | 0.413020                    |
| Thermal correction to Enthalpy=            | 0.413964                    |
| Thermal correction to Gibbs Free Energy=   | 0.338092                    |
| Sum of electronic and zero-point Energies= | -1181.423029                |

|                                              |              |
|----------------------------------------------|--------------|
| Sum of electronic and thermal Energies=      | -1181.399676 |
| Sum of electronic and thermal Enthalpies=    | -1181.398731 |
| Sum of electronic and thermal Free Energies= | -1181.474603 |

#### 4c,(N-O)

|   |             |             |             |
|---|-------------|-------------|-------------|
| C | -3.61560200 | -2.55751900 | -0.65811100 |
| C | -2.69103200 | -2.25775600 | 0.33609300  |
| C | -2.04942300 | -1.01148300 | 0.34214700  |
| C | -2.34630600 | -0.04615100 | -0.65314400 |
| C | -3.27686200 | -0.36821500 | -1.64837800 |
| C | -3.90490300 | -1.61405700 | -1.64967400 |
| C | -0.82889800 | 1.56466900  | 0.40974200  |
| C | -0.18628900 | 0.47309500  | 1.24758400  |
| C | -1.30247400 | 3.48920000  | -0.56789500 |
| C | -2.14855800 | 2.40209100  | -1.29721900 |
| H | -4.10793700 | -3.52511200 | -0.66160600 |
| H | -2.44699900 | -2.95953300 | 1.12457800  |
| H | -3.50880700 | 0.35973100  | -2.41867600 |
| H | -4.62471700 | -1.84469700 | -2.42957000 |
| H | -1.92889700 | 4.27045800  | -0.12380300 |
| H | -1.92362200 | 2.33012100  | -2.36733100 |
| N | -1.13522300 | -0.68904100 | 1.34603900  |
| N | -1.72201600 | 1.18934600  | -0.58961500 |
| N | -0.54017600 | 2.80578000  | 0.49122600  |
| O | -0.90540200 | -1.48433800 | 2.32639100  |
| C | 1.13518800  | 0.01320400  | 0.60616900  |
| C | 1.37596000  | -1.30326600 | 0.19126600  |
| C | 2.15886800  | 0.95725700  | 0.47194500  |
| C | 2.60510800  | -1.66166500 | -0.35056600 |
| H | 0.61172400  | -2.06432100 | 0.30295300  |
| C | 3.39584100  | 0.60904800  | -0.06840300 |
| H | 1.98001500  | 1.97864700  | 0.79318800  |
| C | 3.62364600  | -0.70932600 | -0.48609700 |
| H | 2.79994300  | -2.68014800 | -0.67127800 |
| H | 4.16745500  | 1.36534700  | -0.15628800 |
| H | -3.22961300 | 2.54730900  | -1.18150500 |
| H | -0.60299900 | 3.98346900  | -1.25131800 |
| O | 0.00800100  | 0.96656200  | 2.53782200  |
| H | 0.16250700  | 0.16501500  | 3.07654700  |
| O | 4.78987500  | -1.16044100 | -1.03086400 |
| C | 5.86162900  | -0.24284900 | -1.18269300 |
| H | 6.18490100  | 0.16459000  | -0.21577700 |
| H | 6.68104100  | -0.81142800 | -1.62622500 |
| H | 5.59275700  | 0.58602800  | -1.85083200 |

|                                 |                             |
|---------------------------------|-----------------------------|
| Zero-point correction=          | 0.311075 (Hartree/Particle) |
| Thermal correction to Energy=   | 0.329574                    |
| Thermal correction to Enthalpy= | 0.330518                    |

|                                              |              |
|----------------------------------------------|--------------|
| Thermal correction to Gibbs Free Energy=     | 0.264043     |
| Sum of electronic and zero-point Energies=   | -1046.601127 |
| Sum of electronic and thermal Energies=      | -1046.582628 |
| Sum of electronic and thermal Enthalpies=    | -1046.581683 |
| Sum of electronic and thermal Free Energies= | -1046.648158 |

#### 4c,(amid)

|   |             |             |             |
|---|-------------|-------------|-------------|
| C | -3.30636900 | -2.78863200 | -0.55908900 |
| C | -2.51305400 | -2.30977400 | 0.47876500  |
| C | -1.94543200 | -1.03168300 | 0.39791100  |
| C | -2.18592800 | -0.22371500 | -0.73967100 |
| C | -2.97910900 | -0.72095900 | -1.77719000 |
| C | -3.53806900 | -1.99665700 | -1.68718800 |
| C | -0.92558900 | 1.57086200  | 0.28791400  |
| C | -0.22174900 | 0.62238300  | 1.24340100  |
| C | -1.63707700 | 3.41388300  | -0.70549500 |
| C | -2.24785400 | 2.20783800  | -1.48518300 |
| H | -3.74014200 | -3.78160100 | -0.48889400 |
| H | -2.31962900 | -2.89403600 | 1.37029500  |
| H | -3.15788600 | -0.10572400 | -2.65337900 |
| H | -4.15371500 | -2.36783200 | -2.50117300 |
| H | -2.40468600 | 4.09574300  | -0.32423800 |
| H | -1.96779800 | 2.20151100  | -2.54343700 |
| N | -1.16310700 | -0.53799100 | 1.45933000  |
| N | -1.64995200 | 1.06637400  | -0.77170600 |
| N | -0.86768000 | 2.84432600  | 0.41619600  |
| O | -1.00952500 | -1.22337300 | 2.52430500  |
| C | 1.10569100  | 0.12239300  | 0.65716900  |
| C | 1.43059800  | -1.23573200 | 0.55105600  |
| C | 2.04994300  | 1.07098000  | 0.25382100  |
| C | 2.66192400  | -1.63109000 | 0.04190800  |
| H | 0.73195700  | -1.99365500 | 0.88638400  |
| C | 3.28797700  | 0.68749500  | -0.26014700 |
| H | 1.81689000  | 2.12769300  | 0.34725800  |
| C | 3.59850700  | -0.67435500 | -0.37072500 |
| H | 2.92287100  | -2.68159300 | -0.03818500 |
| H | 3.99634300  | 1.44995000  | -0.56341800 |
| H | -3.34149100 | 2.15881300  | -1.41680600 |
| H | -0.96422200 | 4.00250700  | -1.33874400 |
| O | 0.01356300  | 1.26917600  | 2.45273500  |
| H | -0.42745100 | 2.13816600  | 2.39795900  |
| O | 4.77364300  | -1.16501300 | -0.85982700 |
| C | 5.76984900  | -0.24166800 | -1.26949200 |
| H | 6.09303100  | 0.39894600  | -0.43845000 |
| H | 6.61411800  | -0.84411500 | -1.60969200 |
| H | 5.41997700  | 0.39053300  | -2.09652100 |

|                        |                             |
|------------------------|-----------------------------|
| Zero-point correction= | 0.311127 (Hartree/Particle) |
|------------------------|-----------------------------|



|                                              |              |
|----------------------------------------------|--------------|
| Thermal correction to Energy=                | 0.329613     |
| Thermal correction to Enthalpy=              | 0.330557     |
| Thermal correction to Gibbs Free Energy=     | 0.264331     |
| Sum of electronic and zero-point Energies=   | -1046.598639 |
| Sum of electronic and thermal Energies=      | -1046.580153 |
| Sum of electronic and thermal Enthalpies=    | -1046.579209 |
| Sum of electronic and thermal Free Energies= | -1046.645435 |

#### 4d

|   |             |             |             |
|---|-------------|-------------|-------------|
| C | -4.34742200 | -0.45207200 | -2.16425700 |
| C | -3.02164500 | -0.03182700 | -2.12944600 |
| C | -2.18185800 | -0.43389700 | -1.08363400 |
| C | -2.67883000 | -1.27849700 | -0.06375800 |
| C | -4.01642700 | -1.69157000 | -0.10989300 |
| C | -4.84433300 | -1.28032000 | -1.15372400 |
| C | -0.47691600 | -1.32048300 | 1.00452700  |
| C | 0.01559000  | -0.15267000 | 0.14922000  |
| C | -0.62541900 | -2.90988000 | 2.53127800  |
| C | -2.03779900 | -2.78385600 | 1.88317400  |
| H | -4.99107400 | -0.13324800 | -2.97847000 |
| H | -2.60192700 | 0.60092500  | -2.90155900 |
| H | -4.40309200 | -2.33648900 | 0.67236000  |
| H | -5.87857700 | -1.61139100 | -1.17502700 |
| H | -0.21036300 | -3.91839900 | 2.42799000  |
| H | -2.81936700 | -2.52437100 | 2.60619300  |
| N | -0.82910800 | -0.03542000 | -1.07440700 |
| N | -1.81359200 | -1.68571500 | 0.93771400  |
| N | 0.25181800  | -1.94296700 | 1.85059100  |
| O | -0.37440400 | 0.66523400  | -2.04564300 |
| C | 1.48522800  | -0.30643600 | -0.20723200 |
| C | 1.89073300  | -1.03603500 | -1.33365800 |
| C | 2.45965900  | 0.18865100  | 0.65682100  |
| C | 3.23688500  | -1.24913900 | -1.59263400 |
| H | 1.15351100  | -1.43060200 | -2.02435200 |
| C | 3.81789300  | -0.01327700 | 0.40466300  |
| H | 2.15835600  | 0.74436200  | 1.53633900  |
| C | 4.21236800  | -0.73660300 | -0.72535100 |
| H | 3.55893300  | -1.80597300 | -2.46688500 |
| H | 4.54926300  | 0.39264100  | 1.09394800  |
| H | -2.35182500 | -3.68875800 | 1.34796500  |
| H | -0.64859300 | -2.67759000 | 3.60188700  |
| O | -0.25095900 | 0.94892000  | 1.02398100  |
| O | 0.25247600  | 2.17498800  | 0.38728700  |
| C | -0.65426700 | 3.26189400  | 0.69434600  |
| C | -2.03684400 | 3.01456400  | 0.08464300  |
| C | -0.72562100 | 3.47865000  | 2.21056600  |
| C | 0.05471600  | 4.43171600  | -0.00242700 |
| H | -1.94504200 | 2.80552600  | -0.98518000 |
| H | -2.53129500 | 2.16513400  | 0.56309400  |

|   |             |             |             |
|---|-------------|-------------|-------------|
| H | -2.67169300 | 3.89780500  | 0.21800900  |
| H | 0.27671100  | 3.63934600  | 2.62121000  |
| H | -1.34023200 | 4.35619600  | 2.44098300  |
| H | -1.16788700 | 2.61088300  | 2.70779300  |
| H | -0.51864200 | 5.35219300  | 0.15021700  |
| H | 1.05967400  | 4.57524400  | 0.40657600  |
| H | 0.13931900  | 4.24476000  | -1.07713200 |
| O | 5.50800900  | -0.99632300 | -1.07080900 |
| C | 6.53716600  | -0.50078800 | -0.23093900 |
| H | 6.46983500  | -0.91948500 | 0.78212300  |
| H | 7.47635600  | -0.81674000 | -0.68927200 |
| H | 6.51571300  | 0.59543300  | -0.16833100 |

|                                              |                             |
|----------------------------------------------|-----------------------------|
| Zero-point correction=                       | 0.426345 (Hartree/Particle) |
| Thermal correction to Energy=                | 0.451612                    |
| Thermal correction to Enthalpy=              | 0.452556                    |
| Thermal correction to Gibbs Free Energy=     | 0.372018                    |
| Sum of electronic and zero-point Energies=   | -1278.770075                |
| Sum of electronic and thermal Energies=      | -1278.744809                |
| Sum of electronic and thermal Enthalpies=    | -1278.743864                |
| Sum of electronic and thermal Free Energies= | -1278.824402                |

#### 4e,(N-O)

|   |           |           |           |
|---|-----------|-----------|-----------|
| C | -2.863696 | 3.268463  | -0.229180 |
| C | -2.083452 | 2.558329  | 0.676376  |
| C | -1.729608 | 1.230415  | 0.404793  |
| C | -2.179673 | 0.596829  | -0.780061 |
| C | -2.963365 | 1.327462  | -1.681961 |
| C | -3.299347 | 2.652838  | -1.407670 |
| C | -1.067867 | -1.484761 | -0.115551 |
| C | -0.227861 | -0.749342 | 0.921199  |
| C | -1.914296 | -3.017408 | -1.464868 |
| C | -2.486945 | -1.646959 | -1.939185 |
| H | -3.130414 | 4.299446  | -0.018239 |
| H | -1.737749 | 2.997766  | 1.604343  |
| H | -3.312926 | 0.852383  | -2.592604 |
| H | -3.908307 | 3.203951  | -2.118364 |
| H | -1.342420 | -3.515290 | -2.255250 |
| H | -3.579043 | -1.584661 | -1.863944 |
| N | -0.969611 | 0.497060  | 1.324838  |
| N | -1.857595 | -0.733492 | -0.979527 |
| N | -1.027524 | -2.744461 | -0.319888 |
| O | -0.754076 | 0.948977  | 2.505828  |
| C | 1.167794  | -0.413886 | 0.388668  |
| C | 1.888008  | -1.379801 | -0.333255 |
| C | 1.776397  | 0.811397  | 0.669336  |
| C | 3.173717  | -1.113621 | -0.778894 |
| H | 1.432953  | -2.344154 | -0.533274 |

|   |           |           |           |
|---|-----------|-----------|-----------|
| C | 3.067564  | 1.091168  | 0.219208  |
| H | 1.252284  | 1.557480  | 1.255989  |
| C | 3.772634  | 0.127278  | -0.511421 |
| H | 3.739352  | -1.853569 | -1.336262 |
| H | 3.509333  | 2.053752  | 0.449118  |
| H | -2.197643 | -1.394484 | -2.966128 |
| H | -2.705648 | -3.707678 | -1.152680 |
| O | 0.009529  | -1.521549 | 2.067073  |
| O | -1.259239 | -1.784562 | 2.732382  |
| H | -1.296403 | -0.973536 | 3.282408  |
| O | 5.032205  | 0.293452  | -1.001327 |
| C | 5.697960  | 1.522257  | -0.750192 |
| H | 5.830224  | 1.696222  | 0.325528  |
| H | 6.676844  | 1.433383  | -1.224512 |
| H | 5.157541  | 2.370765  | -1.189789 |

|                                              |                             |
|----------------------------------------------|-----------------------------|
| Zero-point correction=                       | 0.314862 (Hartree/Particle) |
| Thermal correction to Energy=                | 0.334329                    |
| Thermal correction to Enthalpy=              | 0.335273                    |
| Thermal correction to Gibbs Free Energy=     | 0.266849                    |
| Sum of electronic and zero-point Energies=   | -1121.697444                |
| Sum of electronic and thermal Energies=      | -1121.677978                |
| Sum of electronic and thermal Enthalpies=    | -1121.677033                |
| Sum of electronic and thermal Free Energies= | -1121.745457                |

#### 4e,(amid)

|   |             |             |             |
|---|-------------|-------------|-------------|
| C | -3.42925800 | -2.88688700 | -0.31513000 |
| C | -2.56586700 | -2.33095500 | 0.62341100  |
| C | -1.96004900 | -1.09291500 | 0.37404300  |
| C | -2.23270000 | -0.40320500 | -0.83074500 |
| C | -3.09749300 | -0.97695300 | -1.76728500 |
| C | -3.69363600 | -2.21226400 | -1.51035100 |
| C | -0.85039100 | 1.45700200  | -0.08593000 |
| C | -0.17938200 | 0.60429400  | 0.98236200  |
| C | -1.42772700 | 3.15083900  | -1.39137900 |
| C | -2.16944500 | 1.89001200  | -1.92784600 |
| H | -3.89300400 | -3.84791800 | -0.11445800 |
| H | -2.34509900 | -2.82299800 | 1.56273600  |
| H | -3.30309900 | -0.45388200 | -2.69562200 |
| H | -4.36464500 | -2.64375700 | -2.24714500 |
| H | -2.11867300 | 3.96049000  | -1.13413500 |
| H | -1.92853500 | 1.66625600  | -2.97213400 |
| N | -1.10176300 | -0.52514400 | 1.33242000  |
| N | -1.64917900 | 0.84704200  | -1.03119500 |
| N | -0.68151000 | 2.72533800  | -0.19190000 |
| O | -0.89874900 | -1.11016200 | 2.44760400  |

|   |             |             |             |
|---|-------------|-------------|-------------|
| C | 1.18159000  | 0.08373300  | 0.51123100  |
| C | 1.54410200  | -1.26652700 | 0.62076900  |
| C | 2.11037100  | 0.99241700  | -0.00576500 |
| C | 2.79698600  | -1.69462400 | 0.20377700  |
| H | 0.85540100  | -1.98442300 | 1.05037500  |
| C | 3.37318700  | 0.57330500  | -0.42216100 |
| H | 1.84323800  | 2.04167600  | -0.08027700 |
| C | 3.72133300  | -0.78015300 | -0.32163300 |
| H | 3.08687500  | -2.73736500 | 0.28418400  |
| H | 4.07058400  | 1.30372100  | -0.81574400 |
| H | -3.26018200 | 1.95608500  | -1.83129000 |
| H | -0.72221700 | 3.54774300  | -2.12999300 |
| O | 0.11131600  | 1.36689200  | 2.12461100  |
| O | -1.08102900 | 2.08782000  | 2.55089500  |
| H | -1.00097300 | 2.86678200  | 1.95915700  |
| O | 4.92013900  | -1.30236300 | -0.70230400 |
| C | 5.90620900  | -0.42188400 | -1.22012300 |
| H | 6.19107900  | 0.34125700  | -0.48435500 |
| H | 6.77267800  | -1.04520900 | -1.44768700 |
| H | 5.56333100  | 0.07198300  | -2.13880800 |

|                                              |                             |
|----------------------------------------------|-----------------------------|
| Zero-point correction=                       | 0.315210 (Hartree/Particle) |
| Thermal correction to Energy=                | 0.334646                    |
| Thermal correction to Enthalpy=              | 0.335590                    |
| Thermal correction to Gibbs Free Energy=     | 0.267297                    |
| Sum of electronic and zero-point Energies=   | -1121.697417                |
| Sum of electronic and thermal Energies=      | -1121.677981                |
| Sum of electronic and thermal Enthalpies=    | -1121.677037                |
| Sum of electronic and thermal Free Energies= | -1121.745331                |

### 5a,*syn*

|   |             |             |             |
|---|-------------|-------------|-------------|
| C | 4.64198600  | -1.44692600 | -0.72096700 |
| C | 3.38257600  | -1.57697700 | -1.30120700 |
| C | 2.37819300  | -0.68028800 | -0.93325500 |
| C | 2.69170700  | 0.34478200  | -0.00734900 |
| C | 4.84451200  | -0.42194900 | 0.20144200  |
| C | 0.47018500  | 1.28739800  | -0.27552800 |
| C | -0.04270100 | -0.09863000 | -0.71414000 |
| C | 0.16651400  | 3.58126700  | 0.12313000  |
| C | 1.01395200  | 3.40425400  | 1.38457500  |
| C | 2.19290200  | 2.48919300  | 1.07844700  |
| H | 5.44675000  | -2.12874600 | -0.97560700 |
| H | 3.14879800  | -2.34842500 | -2.02488300 |
| H | 5.81067400  | -0.28927600 | 0.68362000  |
| H | 0.75387600  | 4.08561900  | -0.65970000 |
| H | 0.39145500  | 2.96903500  | 2.17593900  |
| H | 2.67397700  | 2.12448700  | 1.98906700  |
| N | 1.09050700  | -0.75883000 | -1.46853600 |

|   |             |             |             |
|---|-------------|-------------|-------------|
| N | 1.74456900  | 1.31668100  | 0.29975100  |
| N | -0.30539000 | 2.29736000  | -0.38601500 |
| O | 0.84462200  | -1.62013700 | -2.38240700 |
| C | -0.35854000 | -0.96395800 | 0.52436200  |
| C | -0.93128200 | -0.38631100 | 1.66526200  |
| C | -0.12681900 | -2.34573000 | 0.51301500  |
| C | -1.25173600 | -1.16940300 | 2.77365600  |
| H | -1.14702800 | 0.67692600  | 1.67909700  |
| C | -0.44938800 | -3.12790900 | 1.62323900  |
| H | 0.30099400  | -2.81599200 | -0.36639200 |
| C | -1.00852100 | -2.54329300 | 2.75940800  |
| H | -1.69639400 | -0.70222300 | 3.64837100  |
| H | -0.25938900 | -4.19767100 | 1.59619300  |
| H | -1.25584400 | -3.15272000 | 3.62448000  |
| H | 2.96243200  | 3.01807100  | 0.50321900  |
| H | 1.38893600  | 4.36451500  | 1.75532000  |
| H | -0.70712900 | 4.21250100  | 0.31726900  |
| C | -1.25068200 | 0.00819500  | -1.69903300 |
| H | -1.06617500 | 0.86882300  | -2.34669900 |
| H | -1.18525800 | -0.88813400 | -2.31864700 |
| C | -2.64882900 | 0.08984900  | -1.11412400 |
| C | -3.29257700 | 1.31793700  | -0.90979000 |
| C | -3.36232300 | -1.08608500 | -0.83895200 |
| C | -4.60330500 | 1.36840100  | -0.43259300 |
| H | -2.74934000 | 2.23288300  | -1.11812200 |
| C | -4.66996400 | -1.03965500 | -0.35557700 |
| H | -2.88605700 | -2.04929200 | -1.00400900 |
| C | -5.29658500 | 0.19039400  | -0.14992300 |
| H | -5.08505300 | 2.33210600  | -0.28528700 |
| H | -5.20110300 | -1.96512800 | -0.14757200 |
| H | -6.31783500 | 0.22996600  | 0.22062700  |
| N | 3.89690000  | 0.46142500  | 0.54742700  |

|                                              |                             |
|----------------------------------------------|-----------------------------|
| Zero-point correction=                       | 0.401358 (Hartree/Particle) |
| Thermal correction to Energy=                | 0.423003                    |
| Thermal correction to Enthalpy=              | 0.423947                    |
| Thermal correction to Gibbs Free Energy=     | 0.350125                    |
| Sum of electronic and zero-point Energies=   | -1182.435319                |
| Sum of electronic and thermal Energies=      | -1182.413674                |
| Sum of electronic and thermal Enthalpies=    | -1182.412730                |
| Sum of electronic and thermal Free Energies= | -1182.486553                |

### **5a,anti**

|   |             |             |             |
|---|-------------|-------------|-------------|
| C | -3.19485600 | -3.28408800 | -0.25686700 |
| C | -1.94688100 | -2.85646700 | -0.70291100 |
| C | -1.63169400 | -1.50029000 | -0.61203300 |
| C | -2.60621000 | -0.60636100 | -0.10715100 |
| C | -4.07460700 | -2.33301200 | 0.25742900  |

|   |             |             |             |
|---|-------------|-------------|-------------|
| C | -1.11040000 | 1.28545100  | -0.50030200 |
| C | 0.08791000  | 0.30082200  | -0.47589200 |
| C | -1.97474600 | 3.49009400  | -0.75591400 |
| C | -3.37476300 | 2.87380800  | -0.78417300 |
| C | -3.42591200 | 1.71375100  | 0.20586800  |
| H | -3.47562100 | -4.33124100 | -0.30021400 |
| H | -1.20919200 | -3.53348100 | -1.11684700 |
| H | -5.05572200 | -2.62398100 | 0.62656400  |
| H | -1.85340600 | 4.11705700  | 0.13953200  |
| H | -3.60399200 | 2.49922200  | -1.78934300 |
| H | -4.36704100 | 1.16776700  | 0.16734800  |
| N | -0.40145900 | -0.99851200 | -1.03965300 |
| N | -2.34817400 | 0.76247300  | -0.11091700 |
| N | -0.88838700 | 2.51708700  | -0.76191100 |
| O | 0.40132500  | -1.75912600 | -1.68273600 |
| C | 0.52686600  | 0.07380400  | 0.98701400  |
| C | 1.02301500  | -1.17085100 | 1.39637900  |
| C | 0.48370500  | 1.12120800  | 1.91665200  |
| C | 1.45300100  | -1.36541400 | 2.70870700  |
| H | 1.08789200  | -1.98657400 | 0.68423000  |
| C | 0.91710100  | 0.92496200  | 3.22868800  |
| H | 0.12132700  | 2.09769200  | 1.61143100  |
| C | 1.39917000  | -0.32037200 | 3.63157800  |
| H | 1.83480300  | -2.33816200 | 3.00691300  |
| H | 0.87469200  | 1.74953200  | 3.93562700  |
| H | 1.73307300  | -0.47423100 | 4.65418200  |
| H | -3.28985100 | 2.07312000  | 1.23472300  |
| H | -4.13581000 | 3.62039000  | -0.53001300 |
| H | -1.82343500 | 4.15769700  | -1.61277100 |
| C | 1.24165800  | 0.84487400  | -1.37912200 |
| H | 0.97410500  | 0.60942700  | -2.41355400 |
| H | 1.18387200  | 1.92993400  | -1.27802900 |
| C | 2.66459700  | 0.39882000  | -1.09507100 |
| C | 3.25632700  | -0.67210900 | -1.77884500 |
| C | 3.45164900  | 1.11764700  | -0.18330500 |
| C | 4.58870100  | -1.01882700 | -1.54993100 |
| H | 2.66219500  | -1.23878300 | -2.48704700 |
| C | 4.78132200  | 0.76922400  | 0.05445600  |
| H | 3.01590700  | 1.96052500  | 0.34721400  |
| C | 5.35596700  | -0.30282500 | -0.62965700 |
| H | 5.02811000  | -1.85081600 | -2.09487000 |
| H | 5.36951600  | 1.34084300  | 0.76806300  |
| H | 6.39362900  | -0.57378100 | -0.45178700 |
| N | -3.79357700 | -1.02422600 | 0.32776200  |

|                                            |                             |
|--------------------------------------------|-----------------------------|
| Zero-point correction=                     | 0.400971 (Hartree/Particle) |
| Thermal correction to Energy=              | 0.422701                    |
| Thermal correction to Enthalpy=            | 0.423645                    |
| Thermal correction to Gibbs Free Energy=   | 0.349551                    |
| Sum of electronic and zero-point Energies= | -1182.434776                |
| Sum of electronic and thermal Energies=    | -1182.413046                |

Sum of electronic and thermal Enthalpies= -1182.412102  
Sum of electronic and thermal Free Energies= -1182.486196

**5b,syn**

|   |             |             |             |
|---|-------------|-------------|-------------|
| C | 4.09558300  | -1.30647600 | -0.74516400 |
| C | 2.82225900  | -1.47879200 | -1.28193900 |
| C | 1.80044500  | -0.62057200 | -0.87316700 |
| C | 2.10920700  | 0.40973000  | 0.04644000  |
| C | 4.29348700  | -0.27878400 | 0.17588500  |
| C | -0.14889700 | 1.27028500  | -0.15550300 |
| C | -0.62765700 | -0.14365300 | -0.57560500 |
| C | -0.54932500 | 3.54779500  | 0.28280100  |
| C | 0.35418500  | 3.39261000  | 1.50779000  |
| C | 1.56215700  | 2.53694400  | 1.14600900  |
| H | 4.91467700  | -1.95759700 | -1.03194000 |
| H | 2.59269800  | -2.25415000 | -2.00270500 |
| H | 5.27064200  | -0.11403700 | 0.62474100  |
| H | -0.02613000 | 4.10393700  | -0.51000500 |
| H | -0.21618000 | 2.91877200  | 2.31585800  |
| H | 2.10151200  | 2.19667400  | 2.03283200  |
| N | 0.49712400  | -0.74615300 | -1.37131900 |
| N | 1.13781200  | 1.34093900  | 0.38865400  |
| N | -0.95884000 | 2.25014500  | -0.23907200 |
| O | 0.27568800  | -1.59967400 | -2.29995400 |
| C | -0.83844500 | -0.99743200 | 0.69811900  |
| C | -1.45671300 | -0.44015500 | 1.82645600  |
| C | -0.44910000 | -2.34336000 | 0.73701600  |
| C | -1.67438300 | -1.21170800 | 2.96806400  |
| H | -1.78524100 | 0.59312200  | 1.80888700  |
| C | -0.66590300 | -3.11116200 | 1.88161900  |
| H | 0.01324600  | -2.80029000 | -0.13150300 |
| C | -1.27612300 | -2.54820500 | 3.00253800  |
| H | -2.15896700 | -0.76275200 | 3.83068700  |
| H | -0.35611300 | -4.15265100 | 1.89244400  |
| H | -1.44290600 | -3.14664700 | 3.89397500  |
| H | 2.27688000  | 3.10241500  | 0.53576800  |
| H | 0.69856600  | 4.36441800  | 1.87767300  |
| H | -1.45487400 | 4.11433400  | 0.52219900  |
| C | -1.95629100 | -0.08102500 | -1.45945600 |
| C | -1.72636200 | 0.65123100  | -2.80556000 |
| C | -2.57432300 | -1.48454500 | -1.73353900 |
| H | -1.01484400 | 0.08908400  | -3.41313800 |
| H | -2.67526900 | 0.70914400  | -3.34741000 |
| H | -1.36168800 | 1.66647800  | -2.64624500 |
| H | -3.51187800 | -1.34303800 | -2.27949300 |
| H | -1.89698800 | -2.09026000 | -2.33178800 |
| H | -2.80495100 | -2.00772500 | -0.80324900 |

|   |             |            |             |
|---|-------------|------------|-------------|
| C | -3.02042500 | 0.62717000 | -0.70872300 |
| N | -3.97707600 | 1.04803500 | -0.20110700 |
| N | 3.32841500  | 0.56828900 | 0.55964000  |

|                                              |                             |
|----------------------------------------------|-----------------------------|
| Zero-point correction=                       | 0.374441 (Hartree/Particle) |
| Thermal correction to Energy=                | 0.396009                    |
| Thermal correction to Enthalpy=              | 0.396953                    |
| Thermal correction to Gibbs Free Energy=     | 0.325345                    |
| Sum of electronic and zero-point Energies=   | -1122.296135                |
| Sum of electronic and thermal Energies=      | -1122.274567                |
| Sum of electronic and thermal Enthalpies=    | -1122.273622                |
| Sum of electronic and thermal Free Energies= | -1122.345231                |

### 5b,*anti*

|   |             |             |             |
|---|-------------|-------------|-------------|
| C | 3.40589700  | -2.66071100 | -1.05838500 |
| C | 2.04906500  | -2.63231700 | -0.75073600 |
| C | 1.45614000  | -1.40585100 | -0.43345000 |
| C | 2.25934000  | -0.24390900 | -0.44644500 |
| C | 4.11508700  | -1.46128700 | -1.04080800 |
| C | 0.33665600  | 1.18085700  | 0.10335300  |
| C | -0.58053000 | -0.05888200 | 0.30185900  |
| C | 0.53285700  | 3.54400300  | 0.12829600  |
| C | 1.99188000  | 3.35133300  | 0.53444200  |
| C | 2.58101300  | 2.18271000  | -0.24325700 |
| H | 3.90120400  | -3.59333700 | -1.30755000 |
| H | 1.43069400  | -3.52129400 | -0.74474500 |
| H | 5.17672500  | -1.43515400 | -1.27581000 |
| H | 0.46976500  | 3.90888500  | -0.90819300 |
| H | 2.04994600  | 3.14990600  | 1.61165900  |
| H | 3.55963900  | 1.88929500  | 0.13663400  |
| N | 0.10135800  | -1.32758800 | -0.12642000 |
| N | 1.69790000  | 0.99988300  | -0.15230200 |
| N | -0.24078300 | 2.31468900  | 0.23373400  |
| O | -0.61928500 | -2.37985200 | -0.18874200 |
| C | -1.82910200 | 0.06330000  | -0.60108900 |
| C | -3.05026300 | -0.54060000 | -0.27907500 |
| C | -1.71157400 | 0.68482700  | -1.85333300 |
| C | -4.13072400 | -0.48657400 | -1.16201800 |
| H | -3.17295400 | -1.08130800 | 0.65016400  |
| C | -2.78492600 | 0.72999800  | -2.74020900 |
| H | -0.77476500 | 1.14635900  | -2.14669200 |
| C | -4.00628500 | 0.15098300  | -2.39428900 |
| H | -5.06799700 | -0.95915600 | -0.88152100 |
| H | -2.66369400 | 1.22110200  | -3.70204400 |
| H | -4.84721800 | 0.18995000  | -3.08142600 |
| H | 2.71567000  | 2.44288000  | -1.30111400 |
| H | 2.58497400  | 4.25185800  | 0.34022900  |
| H | 0.04511900  | 4.30346100  | 0.74984900  |



|   |             |             |             |
|---|-------------|-------------|-------------|
| C | -0.87207500 | -0.18840300 | 1.88338500  |
| C | 0.45793800  | -0.14105000 | 2.68415200  |
| C | -1.81687000 | 0.91952900  | 2.41635100  |
| H | 0.92423900  | 0.84330700  | 2.59312800  |
| H | 0.24818700  | -0.32050500 | 3.74217800  |
| H | 1.16512600  | -0.90507500 | 2.34985700  |
| H | -1.97412800 | 0.76390300  | 3.48835200  |
| H | -1.37153900 | 1.89994200  | 2.24921100  |
| H | -2.78658800 | 0.89965800  | 1.91720600  |
| C | -1.49612600 | -1.48321800 | 2.23896800  |
| N | -1.98585200 | -2.43452900 | 2.69149000  |
| N | 3.55559100  | -0.27878200 | -0.74588800 |

|                                              |                             |
|----------------------------------------------|-----------------------------|
| Zero-point correction=                       | 0.374315 (Hartree/Particle) |
| Thermal correction to Energy=                | 0.395914                    |
| Thermal correction to Enthalpy=              | 0.396858                    |
| Thermal correction to Gibbs Free Energy=     | 0.324650                    |
| Sum of electronic and zero-point Energies=   | -1122.286888                |
| Sum of electronic and thermal Energies=      | -1122.265289                |
| Sum of electronic and thermal Enthalpies=    | -1122.264345                |
| Sum of electronic and thermal Free Energies= | -1122.336552                |

### 5c,syn(N-O)

|   |             |             |             |
|---|-------------|-------------|-------------|
| C | -3.54491100 | -2.05287700 | -0.46388100 |
| C | -2.44744200 | -2.14667600 | 0.38688600  |
| C | -1.55481400 | -1.07331800 | 0.44931000  |
| C | -1.81368500 | 0.08060700  | -0.33669500 |
| C | -3.70275100 | -0.88862200 | -1.21531000 |
| C | 0.08475300  | 1.25428700  | 0.65483200  |
| C | 0.66417500  | -0.09478000 | 1.11611600  |
| C | 0.22177100  | 3.59047300  | 0.51376300  |
| C | -0.28183200 | 3.45666700  | -0.92468800 |
| C | -1.38894600 | 2.41089800  | -0.98405800 |
| H | -4.25971100 | -2.86498000 | -0.54536200 |
| H | -2.25447400 | -3.01837800 | 1.00098000  |
| H | -4.54220800 | -0.77690700 | -1.89810800 |
| H | -0.57658300 | 3.97874500  | 1.16435500  |
| H | 0.55346400  | 3.15604000  | -1.56906200 |
| H | -1.61902000 | 2.11852100  | -2.01076500 |
| N | -0.43410400 | -1.10210300 | 1.26287300  |
| N | -0.98656700 | 1.19505800  | -0.24683100 |
| N | 0.68302600  | 2.31080000  | 1.04026300  |
| O | -0.18218800 | -2.09689000 | 2.03119400  |
| H | -2.31854800 | 2.79589600  | -0.54713600 |
| H | -0.66578700 | 4.40877500  | -1.30729400 |
| H | 1.05122000  | 4.30277700  | 0.57796800  |
| O | 1.23562200  | 0.07447200  | 2.37425600  |
| H | 1.31217800  | -0.83595900 | 2.72400900  |

|   |             |             |             |
|---|-------------|-------------|-------------|
| N | -2.86465200 | 0.15623700  | -1.15155100 |
| C | 1.70360800  | -0.59848300 | 0.09259300  |
| C | 2.86932300  | 0.16459900  | -0.06825900 |
| C | 1.55099600  | -1.77935000 | -0.63938700 |
| C | 3.85955700  | -0.24503200 | -0.95762900 |
| H | 2.98379400  | 1.07418400  | 0.51237200  |
| C | 2.54713000  | -2.18716900 | -1.53103100 |
| H | 0.67017400  | -2.39866400 | -0.50970800 |
| C | 3.70018200  | -1.42189400 | -1.69504500 |
| H | 4.75951900  | 0.35324500  | -1.07339000 |
| H | 2.41834400  | -3.10887500 | -2.09212800 |
| H | 4.47355200  | -1.74099100 | -2.38871800 |

|                                              |                             |
|----------------------------------------------|-----------------------------|
| Zero-point correction=                       | 0.295525 (Hartree/Particle) |
| Thermal correction to Energy=                | 0.312287                    |
| Thermal correction to Enthalpy=              | 0.313231                    |
| Thermal correction to Gibbs Free Energy=     | 0.250633                    |
| Sum of electronic and zero-point Energies=   | -987.475797                 |
| Sum of electronic and thermal Energies=      | -987.459035                 |
| Sum of electronic and thermal Enthalpies=    | -987.458090                 |
| Sum of electronic and thermal Free Energies= | -987.520689                 |

### 5c,*anti*(N-O)

|   |             |             |             |
|---|-------------|-------------|-------------|
| C | 3.73326800  | -2.31336500 | -0.26781400 |
| C | 2.36402900  | -2.46649700 | -0.06946500 |
| C | 1.56447600  | -1.32543200 | 0.01830600  |
| C | 2.17845100  | -0.05383700 | -0.09607500 |
| C | 4.24569000  | -1.02076000 | -0.36608200 |
| C | 0.02331100  | 1.07477600  | 0.07841200  |
| C | -0.60810200 | -0.22523000 | 0.61603200  |
| C | -0.19751600 | 3.34105400  | -0.49984900 |
| C | 1.18361500  | 3.55280100  | 0.12145400  |
| C | 2.09943900  | 2.39744900  | -0.26335900 |
| H | 4.38742800  | -3.17583800 | -0.34146900 |
| H | 1.89058700  | -3.43637600 | 0.02444500  |
| H | 5.30965600  | -0.85332800 | -0.51971400 |
| H | -0.13639100 | 3.39815700  | -1.59749900 |
| H | 1.08244200  | 3.60147900  | 1.21252500  |
| H | 3.01919500  | 2.39212000  | 0.32421500  |
| N | 0.18631900  | -1.42313700 | 0.21098900  |
| N | 1.41546800  | 1.10730500  | -0.03850000 |
| N | -0.76920500 | 2.05294700  | -0.12845900 |
| O | -0.35693300 | -2.56877100 | 0.40895900  |
| H | 2.39539600  | 2.46233400  | -1.31801900 |
| H | 1.63303400  | 4.49542700  | -0.20996800 |
| H | -0.89687900 | 4.12371000  | -0.18630900 |
| O | -0.50787000 | -0.12409100 | 2.02697300  |
| H | -0.88194800 | -0.95209100 | 2.37970700  |

|   |             |             |             |
|---|-------------|-------------|-------------|
| N | 3.49090800  | 0.08350000  | -0.28514200 |
| C | -2.04708000 | -0.39241900 | 0.13548800  |
| C | -3.09860600 | 0.00800200  | 0.96142300  |
| C | -2.32954400 | -0.90326700 | -1.13598100 |
| C | -4.42029900 | -0.11278500 | 0.52875900  |
| H | -2.87744700 | 0.42868200  | 1.93623100  |
| C | -3.64822300 | -1.01970500 | -1.56934700 |
| H | -1.52038400 | -1.22222100 | -1.78606600 |
| C | -4.69909100 | -0.62744000 | -0.73657500 |
| H | -5.23010000 | 0.20229100  | 1.18148700  |
| H | -3.85585200 | -1.42369300 | -2.55660800 |
| H | -5.72765900 | -0.72215300 | -1.07459300 |

|                                              |                             |
|----------------------------------------------|-----------------------------|
| Zero-point correction=                       | 0.295912 (Hartree/Particle) |
| Thermal correction to Energy=                | 0.312658                    |
| Thermal correction to Enthalpy=              | 0.313603                    |
| Thermal correction to Gibbs Free Energy=     | 0.251273                    |
| Sum of electronic and zero-point Energies=   | -987.472346                 |
| Sum of electronic and thermal Energies=      | -987.455600                 |
| Sum of electronic and thermal Enthalpies=    | -987.454656                 |
| Sum of electronic and thermal Free Energies= | -987.516985                 |

### 5c,*anti*(amid)

|   |             |             |             |
|---|-------------|-------------|-------------|
| C | -1.89313100 | 3.49438600  | -0.12173600 |
| C | -0.94511300 | 2.88854800  | 0.69784200  |
| C | -0.76142700 | 1.50702600  | 0.60850000  |
| C | -1.56340200 | 0.77902200  | -0.30556600 |
| C | -2.62044500 | 2.69359500  | -1.00062000 |
| C | -0.51179800 | -1.29680900 | 0.38087800  |
| C | 0.67103700  | -0.50662600 | 0.97818400  |
| C | -1.56097200 | -3.40992000 | 0.12037700  |
| C | -2.82458900 | -2.63909300 | -0.27503300 |
| C | -2.44649500 | -1.41559800 | -1.10994900 |
| H | -2.05969800 | 4.56594800  | -0.08446800 |
| H | -0.34006900 | 3.44301800  | 1.40524700  |
| H | -3.36765700 | 3.12522600  | -1.66259200 |
| H | -1.16651800 | -3.96833800 | -0.74068000 |
| H | -3.35663900 | -2.30819600 | 0.62523500  |
| H | -3.29755500 | -0.76738800 | -1.31377900 |
| N | 0.16666000  | 0.84314600  | 1.41310100  |
| N | -1.44792000 | -0.61682100 | -0.37645800 |
| N | -0.49357100 | -2.55327900 | 0.62365300  |
| O | 0.81814600  | 1.46939800  | 2.30983000  |
| H | -2.02002700 | -1.71790400 | -2.07530100 |
| H | -3.50804200 | -3.27968000 | -0.84334600 |
| H | -1.78557200 | -4.15592400 | 0.89117000  |
| O | 1.11822200  | -1.16526200 | 2.11557100  |
| H | 0.78114100  | -2.08279900 | 2.00129100  |

|   |             |             |             |
|---|-------------|-------------|-------------|
| N | -2.46054400 | 1.36488800  | -1.09169800 |
| C | 1.81914400  | -0.28227600 | -0.01928100 |
| C | 3.08995100  | -0.01280000 | 0.50703800  |
| C | 1.64328600  | -0.30189900 | -1.40680400 |
| C | 4.16479900  | 0.23174500  | -0.34482500 |
| H | 3.22128500  | -0.00362000 | 1.58289000  |
| C | 2.72504400  | -0.06409800 | -2.25822200 |
| H | 0.66827000  | -0.50879700 | -1.83682300 |
| C | 3.98702100  | 0.20501500  | -1.73058300 |
| H | 5.14580300  | 0.43907800  | 0.07452700  |
| H | 2.57654100  | -0.09150200 | -3.33451700 |
| H | 4.82794400  | 0.39095200  | -2.39346200 |

|                                              |                             |
|----------------------------------------------|-----------------------------|
| Zero-point correction=                       | 0.295959 (Hartree/Particle) |
| Thermal correction to Energy=                | 0.312606                    |
| Thermal correction to Enthalpy=              | 0.313550                    |
| Thermal correction to Gibbs Free Energy=     | 0.251343                    |
| Sum of electronic and zero-point Energies=   | -987.477110                 |
| Sum of electronic and thermal Energies=      | -987.460464                 |
| Sum of electronic and thermal Enthalpies=    | -987.459520                 |
| Sum of electronic and thermal Free Energies= | -987.521726                 |

### 5c,syn(amid)

|   |             |             |             |
|---|-------------|-------------|-------------|
| C | -3.01539200 | -2.60540900 | -0.46914900 |
| C | -2.01151800 | -2.43088000 | 0.48042100  |
| C | -1.31928600 | -1.21872700 | 0.51174000  |
| C | -1.69166400 | -0.20875100 | -0.41076100 |
| C | -3.29049500 | -1.55895200 | -1.34749700 |
| C | -0.11328300 | 1.31219200  | 0.59637800  |
| C | 0.68749900  | 0.11286700  | 1.14841300  |
| C | -0.44562300 | 3.63513000  | 0.49550000  |
| C | -0.83637900 | 3.41940300  | -0.97017000 |
| C | -1.69461100 | 2.16453100  | -1.10592400 |
| H | -3.57091400 | -3.53568600 | -0.52793400 |
| H | -1.74336900 | -3.19716900 | 1.19815100  |
| H | -4.06300000 | -1.65555000 | -2.10697800 |
| H | -1.33936400 | 3.84067300  | 1.10371500  |
| H | 0.07553900  | 3.31508300  | -1.57067800 |
| H | -1.78853700 | 1.84647100  | -2.14639700 |
| N | -0.29801500 | -0.98204600 | 1.43542500  |
| N | -1.09086600 | 1.05308100  | -0.34362400 |
| N | 0.23977000  | 2.46349700  | 1.03317800  |
| O | -0.01182300 | -1.84781900 | 2.32645200  |
| H | -2.71080300 | 2.33612700  | -0.73067100 |
| H | -1.39080900 | 4.27815400  | -1.36363500 |
| H | 0.21619300  | 4.50038500  | 0.60430900  |
| O | 1.31281800  | 0.48312300  | 2.32674400  |
| H | 1.15029600  | 1.45081600  | 2.40061400  |

|   |             |             |             |
|---|-------------|-------------|-------------|
| N | -2.64949000 | -0.38050200 | -1.31586100 |
| C | 1.72811300  | -0.37875300 | 0.12170400  |
| C | 2.57885800  | 0.56233500  | -0.47432300 |
| C | 1.89629300  | -1.73386800 | -0.17787900 |
| C | 3.56548300  | 0.15612200  | -1.37014700 |
| H | 2.47123300  | 1.61366000  | -0.22484000 |
| C | 2.88865600  | -2.13931100 | -1.07346000 |
| H | 1.27195300  | -2.47999300 | 0.30088100  |
| C | 3.72116600  | -1.19783900 | -1.67658600 |
| H | 4.21647300  | 0.89754300  | -1.82604800 |
| H | 3.01000300  | -3.19646700 | -1.29397600 |
| H | 4.49045300  | -1.51522200 | -2.37546900 |

|                                              |                             |
|----------------------------------------------|-----------------------------|
| Zero-point correction=                       | 0.295904 (Hartree/Particle) |
| Thermal correction to Energy=                | 0.312556                    |
| Thermal correction to Enthalpy=              | 0.313500                    |
| Thermal correction to Gibbs Free Energy=     | 0.251237                    |
| Sum of electronic and zero-point Energies=   | -987.477731                 |
| Sum of electronic and thermal Energies=      | -987.461079                 |
| Sum of electronic and thermal Enthalpies=    | -987.460135                 |
| Sum of electronic and thermal Free Energies= | -987.522398                 |

### 5d,syn

|   |             |             |             |
|---|-------------|-------------|-------------|
| C | 3.57224400  | -2.96693600 | -0.15012900 |
| C | 2.19055500  | -2.82167500 | -0.24573800 |
| C | 1.65617700  | -1.53622700 | -0.35433000 |
| C | 2.54418700  | -0.43402900 | -0.39114900 |
| C | 4.36211900  | -1.81896000 | -0.17023600 |
| C | 0.68854800  | 1.10973000  | -0.75076800 |
| C | -0.28569000 | 0.04478700  | -0.17854200 |
| C | 1.09598900  | 3.22479300  | -1.67331100 |
| C | 2.33331100  | 3.29534800  | -0.77679300 |
| C | 3.03381500  | 1.94238000  | -0.77201900 |
| H | 4.02531300  | -3.94863300 | -0.05841000 |
| H | 1.51053300  | -3.66504500 | -0.23716300 |
| H | 5.44507400  | -1.88563100 | -0.09163400 |
| H | 1.39174300  | 3.03441600  | -2.71638900 |
| H | 2.02267900  | 3.56222600  | 0.24084500  |
| H | 3.77363900  | 1.86815000  | 0.02770800  |
| N | 0.28059900  | -1.32482300 | -0.44374200 |
| N | 2.05178000  | 0.85459300  | -0.58026200 |
| N | 0.18174400  | 2.17496700  | -1.23688400 |
| O | -0.51885900 | -2.31882300 | -0.49464800 |
| C | -0.47740600 | 0.26635000  | 1.33150800  |
| C | -0.86072400 | 1.53826300  | 1.77760600  |
| C | -0.29985600 | -0.76211400 | 2.26055400  |
| C | -1.04746000 | 1.77837300  | 3.13696400  |
| H | -1.01839400 | 2.32785400  | 1.05016600  |

|   |             |             |             |
|---|-------------|-------------|-------------|
| C | -0.48321800 | -0.51603400 | 3.62305900  |
| H | -0.04231200 | -1.76108700 | 1.92804600  |
| C | -0.85266400 | 0.75311200  | 4.06585700  |
| H | -1.34720700 | 2.76814300  | 3.47137300  |
| H | -0.34150900 | -1.32389000 | 4.33592600  |
| H | -0.99399000 | 0.94245100  | 5.12668100  |
| H | 3.56690000  | 1.77126000  | -1.71523500 |
| H | 3.03576800  | 4.06372200  | -1.11802200 |
| H | 0.54918100  | 4.17365200  | -1.67069000 |
| O | -1.45881700 | 0.20664600  | -0.91731000 |
| O | -2.58664300 | -0.34499000 | -0.14503500 |
| C | -3.68520800 | -0.50717100 | -1.07068000 |
| C | -4.11002700 | 0.85803400  | -1.62714700 |
| C | -3.32200400 | -1.49482400 | -2.18531100 |
| C | -4.76268500 | -1.08972700 | -0.14568800 |
| H | -4.37340600 | 1.53768300  | -0.80974800 |
| H | -3.29850000 | 1.31152000  | -2.20217300 |
| H | -4.98173900 | 0.74746500  | -2.28238700 |
| H | -2.94891300 | -2.42859200 | -1.75696500 |
| H | -4.20488300 | -1.70827300 | -2.79895600 |
| H | -2.54418400 | -1.08297300 | -2.83308600 |
| H | -5.68596300 | -1.24678400 | -0.71315500 |
| H | -4.43914100 | -2.04955200 | 0.26850000  |
| H | -4.97527100 | -0.40532400 | 0.68172200  |
| N | 3.86432100  | -0.57991700 | -0.29529100 |

|                                              |                             |
|----------------------------------------------|-----------------------------|
| Zero-point correction=                       | 0.410654 (Hartree/Particle) |
| Thermal correction to Energy=                | 0.434387                    |
| Thermal correction to Enthalpy=              | 0.435331                    |
| Thermal correction to Gibbs Free Energy=     | 0.357684                    |
| Sum of electronic and zero-point Energies=   | -1219.640686                |
| Sum of electronic and thermal Energies=      | -1219.616953                |
| Sum of electronic and thermal Enthalpies=    | -1219.616009                |
| Sum of electronic and thermal Free Energies= | -1219.693656                |

### 5d,anti

|   |             |             |             |
|---|-------------|-------------|-------------|
| C | -3.66289200 | -2.18487300 | -1.73555600 |
| C | -2.27251800 | -2.23436900 | -1.81327400 |
| C | -1.52413400 | -1.54158300 | -0.86387600 |
| C | -2.20376600 | -0.83285900 | 0.15738300  |
| C | -4.24150700 | -1.44224900 | -0.70822300 |
| C | -0.08933800 | -0.23450500 | 1.20311400  |
| C | 0.59594700  | -0.46856700 | -0.15705900 |
| C | -0.03761600 | 0.31138000  | 3.47761600  |
| C | -1.30534600 | 1.13185000  | 3.22989100  |
| C | -2.24201900 | 0.36001600  | 2.30750600  |
| H | -4.28172800 | -2.70663300 | -2.45808300 |
| H | -1.74784000 | -2.78676000 | -2.58381900 |

|   |             |             |             |
|---|-------------|-------------|-------------|
| H | -5.32314100 | -1.37118000 | -0.61425700 |
| H | -0.28550500 | -0.62178500 | 4.00721700  |
| H | -1.02226000 | 2.08460800  | 2.76625900  |
| H | -3.03549700 | 0.99498400  | 1.90629400  |
| N | -0.12359300 | -1.55299700 | -0.88523500 |
| N | -1.48789400 | -0.20190500 | 1.16893600  |
| N | 0.63809100  | -0.01237600 | 2.22682800  |
| O | 0.50846300  | -2.29608800 | -1.70799700 |
| C | 2.07125600  | -0.81439300 | -0.05358200 |
| C | 3.01960400  | -0.08567200 | -0.77069200 |
| C | 2.48463700  | -1.90327500 | 0.72325100  |
| C | 4.37103600  | -0.43107900 | -0.70117600 |
| H | 2.70165300  | 0.75277700  | -1.37705500 |
| C | 3.83051800  | -2.25185500 | 0.78583400  |
| H | 1.75329900  | -2.47943300 | 1.28093300  |
| C | 4.78045900  | -1.51330000 | 0.07533600  |
| H | 5.10159900  | 0.14753600  | -1.26042700 |
| H | 4.13891000  | -3.10011500 | 1.39110500  |
| H | 5.83199300  | -1.78358700 | 0.12713200  |
| H | -2.73445100 | -0.46120200 | 2.84272000  |
| H | -1.82752600 | 1.36119900  | 4.16533600  |
| H | 0.66858800  | 0.85520000  | 4.11383900  |
| O | 0.32924200  | 0.64478600  | -1.02656800 |
| O | 0.66951100  | 1.88730100  | -0.30082500 |
| C | 0.08674100  | 2.98883300  | -1.03879600 |
| C | 0.68613400  | 3.06500500  | -2.44836700 |
| C | -1.44079700 | 2.86879900  | -1.07679600 |
| C | 0.52910400  | 4.18574100  | -0.18607500 |
| H | 1.77707800  | 3.14452400  | -2.39564900 |
| H | 0.43049400  | 2.17600500  | -3.03079000 |
| H | 0.30183100  | 3.94471900  | -2.97664700 |
| H | -1.84364500 | 2.78745200  | -0.06197400 |
| H | -1.87791700 | 3.75423900  | -1.55150100 |
| H | -1.75156900 | 1.98732400  | -1.64288200 |
| H | 0.16802000  | 5.11431400  | -0.64049300 |
| H | 0.12172600  | 4.11411400  | 0.82746500  |
| H | 1.62034600  | 4.23188900  | -0.11899000 |
| N | -3.53449000 | -0.78507300 | 0.22213400  |

|                                              |                             |
|----------------------------------------------|-----------------------------|
| Zero-point correction=                       | 0.410845 (Hartree/Particle) |
| Thermal correction to Energy=                | 0.434374                    |
| Thermal correction to Enthalpy=              | 0.435319                    |
| Thermal correction to Gibbs Free Energy=     | 0.358697                    |
| Sum of electronic and zero-point Energies=   | -1219.643435                |
| Sum of electronic and thermal Energies=      | -1219.619905                |
| Sum of electronic and thermal Enthalpies=    | -1219.618961                |
| Sum of electronic and thermal Free Energies= | -1219.695582                |

**5e,syn(N-O)**

|   |             |             |             |
|---|-------------|-------------|-------------|
| C | -3.39342600 | -2.30090200 | -0.57607900 |
| C | -2.29581300 | -2.29224800 | 0.27936400  |
| C | -1.48435000 | -1.15609100 | 0.31746000  |
| C | -1.82827400 | -0.04203100 | -0.49060600 |
| C | -3.63574100 | -1.16796400 | -1.35254400 |
| C | -0.00214000 | 1.26957600  | 0.45528200  |
| C | 0.67417800  | -0.04097400 | 0.91842700  |
| C | -0.00951300 | 3.60879800  | 0.28791900  |
| C | -0.56852900 | 3.43466600  | -1.12543500 |
| C | -1.60681400 | 2.31909100  | -1.13376200 |
| H | -4.04467400 | -3.16613400 | -0.64126400 |
| H | -2.04340600 | -3.13129100 | 0.91684000  |
| H | -4.47902000 | -1.13433900 | -2.03900500 |
| H | -0.79874500 | 3.95400100  | 0.97258500  |
| H | 0.25333900  | 3.18651300  | -1.80844100 |
| H | -1.86065700 | 2.00587200  | -2.14824400 |
| N | -0.37229600 | -1.08566400 | 1.14850600  |
| N | -1.09534800 | 1.13587000  | -0.41042000 |
| N | 0.54864700  | 2.36394600  | 0.80332500  |
| O | -0.13650400 | -2.00017600 | 2.01461800  |
| C | 1.71898500  | -0.52200900 | -0.10066800 |
| C | 2.66592300  | 0.39088000  | -0.58365400 |
| C | 1.77967600  | -1.85959500 | -0.50653300 |
| C | 3.64818800  | -0.02873300 | -1.47917900 |
| H | 2.62925500  | 1.42020200  | -0.24354400 |
| C | 2.76033900  | -2.27215900 | -1.40952300 |
| H | 1.07752400  | -2.58438100 | -0.11032000 |
| C | 3.69357900  | -1.35910900 | -1.90080300 |
| H | 4.38018300  | 0.68563700  | -1.84616700 |
| H | 2.79568100  | -3.31192000 | -1.72291500 |
| H | 4.45652100  | -1.68348700 | -2.60344000 |
| H | -2.53973300 | 2.64515300  | -0.65739400 |
| H | -1.03049500 | 4.35821600  | -1.49142000 |
| H | 0.77803400  | 4.36943500  | 0.31062200  |
| O | 1.40399800  | 0.12212200  | 2.10099300  |
| N | -2.88083500 | -0.06150400 | -1.30774900 |
| O | 0.48875400  | 0.44132900  | 3.18644400  |
| H | 0.27741700  | -0.47537900 | 3.46203700  |

Zero-point correction= 0.299614 (Hartree/Particle)

Thermal correction to Energy= 0.317376

Thermal correction to Enthalpy= 0.318320

Thermal correction to Gibbs Free Energy= 0.253717

Sum of electronic and zero-point Energies= -1062.571854

Sum of electronic and thermal Energies= -1062.554092

Sum of electronic and thermal Enthalpies= -1062.553148

Sum of electronic and thermal Free Energies= -1062.617751



### 5e,anti(N-O)

|   |             |             |             |
|---|-------------|-------------|-------------|
| C | 2.93637000  | -2.85721300 | -0.36377000 |
| C | 1.88002600  | -2.57095600 | 0.49553800  |
| C | 1.26435600  | -1.32041900 | 0.40903200  |
| C | 1.76272300  | -0.37327400 | -0.52272000 |
| C | 3.33269100  | -1.87561900 | -1.27185500 |
| C | 0.15482200  | 1.29879600  | 0.25150000  |
| C | -0.69658800 | 0.16578600  | 0.86760900  |
| C | 0.48363400  | 3.61151400  | -0.14689900 |
| C | 1.89492600  | 3.26026500  | -0.62396600 |
| C | 1.85172000  | 1.94665100  | -1.40112500 |
| H | 3.43553100  | -3.81999800 | -0.33585600 |
| H | 1.51308400  | -3.27965400 | 1.22853700  |
| H | 4.14582300  | -2.06024600 | -1.97057600 |
| H | -0.11611000 | 4.00200500  | -0.98220700 |
| H | 2.56519100  | 3.14630600  | 0.23665900  |
| H | 2.84181800  | 1.59135900  | -1.68193300 |
| N | 0.19638000  | -0.97847700 | 1.23232300  |
| N | 1.22932500  | 0.90948100  | -0.56002100 |
| N | -0.24764700 | 2.49280300  | 0.43426700  |
| O | -0.15393900 | -1.73467700 | 2.20574000  |
| C | -1.81042000 | -0.28541500 | -0.08980500 |
| C | -2.06538000 | -1.64065600 | -0.32644900 |
| C | -2.62358000 | 0.68619900  | -0.68833900 |
| C | -3.10572400 | -2.01796200 | -1.17645200 |
| H | -1.46822800 | -2.40347700 | 0.16023000  |
| C | -3.66646800 | 0.30297400  | -1.52999200 |
| H | -2.43655300 | 1.73386700  | -0.47884500 |
| C | -3.90587000 | -1.04925400 | -1.78261400 |
| H | -3.29237900 | -3.07282300 | -1.35811600 |
| H | -4.29372700 | 1.06332700  | -1.98739100 |
| H | -4.71591400 | -1.34627400 | -2.44337400 |
| H | 1.26163200  | 2.05641300  | -2.32068400 |
| H | 2.30415100  | 4.05602300  | -1.25680200 |
| H | 0.51230300  | 4.41022900  | 0.60361700  |
| O | -1.38343600 | 0.57464800  | 2.01620700  |
| N | 2.76697400  | -0.66366900 | -1.34934200 |
| O | -0.42040800 | 0.89876900  | 3.05807100  |
| H | -0.33301700 | 0.00357400  | 3.44785300  |

|                                              |                             |
|----------------------------------------------|-----------------------------|
| Zero-point correction=                       | 0.299316 (Hartree/Particle) |
| Thermal correction to Energy=                | 0.317107                    |
| Thermal correction to Enthalpy=              | 0.318051                    |
| Thermal correction to Gibbs Free Energy=     | 0.253308                    |
| Sum of electronic and zero-point Energies=   | -1062.571326                |
| Sum of electronic and thermal Energies=      | -1062.553535                |
| Sum of electronic and thermal Enthalpies=    | -1062.552590                |
| Sum of electronic and thermal Free Energies= | -1062.617334                |

**5e,anti(amid)**

|   |             |             |             |
|---|-------------|-------------|-------------|
| C | -2.76866900 | -3.12929800 | -0.05385800 |
| C | -1.62335000 | -2.73966600 | -0.74171200 |
| C | -1.16485800 | -1.42834100 | -0.59727500 |
| C | -1.89315600 | -0.54662000 | 0.23421100  |
| C | -3.40914100 | -2.19055100 | 0.75298000  |
| C | -0.32913200 | 1.26090200  | -0.23031100 |
| C | 0.68778800  | 0.24631400  | -0.80826200 |
| C | -0.86812900 | 3.54626400  | 0.17951300  |
| C | -2.31942700 | 3.09153100  | 0.33707400  |
| C | -2.35655000 | 1.75106400  | 1.06603300  |
| H | -3.15217600 | -4.14076900 | -0.13717900 |
| H | -1.06922000 | -3.41178600 | -1.38554600 |
| H | -4.30432500 | -2.45161600 | 1.31268100  |
| H | -0.46995100 | 3.90408900  | 1.14011200  |
| H | -2.78508000 | 2.97978500  | -0.64957500 |
| H | -3.35657000 | 1.32196500  | 1.10378700  |
| N | -0.02285200 | -0.98936400 | -1.27180000 |
| N | -1.48890800 | 0.78740600  | 0.36250500  |
| N | 0.01635900  | 2.49431900  | -0.30959400 |
| O | 0.59261700  | -1.77194000 | -2.06705400 |
| C | 1.77537300  | -0.15753800 | 0.18649200  |
| C | 2.94085600  | -0.76006700 | -0.30554000 |
| C | 1.60312400  | -0.01456800 | 1.56609300  |
| C | 3.92128700  | -1.20374000 | 0.57788800  |
| H | 3.06829300  | -0.86652700 | -1.37606700 |
| C | 2.58834500  | -0.46220900 | 2.44928300  |
| H | 0.70575100  | 0.44950400  | 1.96437200  |
| C | 3.74894800  | -1.05701900 | 1.95732500  |
| H | 4.82603400  | -1.66226900 | 0.18807400  |
| H | 2.44525900  | -0.34234100 | 3.51981900  |
| H | 4.51736700  | -1.40343200 | 2.64333700  |
| H | -2.00416800 | 1.85778900  | 2.10032500  |
| H | -2.90259700 | 3.83300200  | 0.89415000  |
| H | -0.79656400 | 4.39067900  | -0.51523100 |
| O | 1.20640200  | 0.76345800  | -2.02793600 |
| N | -2.98196700 | -0.92783800 | 0.89544200  |
| O | 2.18204800  | 1.79490700  | -1.73448400 |
| H | 1.57113500  | 2.46012900  | -1.32275100 |

Zero-point correction= 0.299414 (Hartree/Particle)

Thermal correction to Energy= 0.317120

Thermal correction to Enthalpy= 0.318064

Thermal correction to Gibbs Free Energy= 0.253600

Sum of electronic and zero-point Energies= -1062.569577

Sum of electronic and thermal Energies= -1062.551871

Sum of electronic and thermal Enthalpies= -1062.550927

Sum of electronic and thermal Free Energies= -1062.615391

## 5e,syn(amid)

|   |             |             |             |
|---|-------------|-------------|-------------|
| C | -3.48301700 | -2.22926800 | -0.34813700 |
| C | -2.39025800 | -2.18661400 | 0.51388500  |
| C | -1.52753300 | -1.09032200 | 0.45122200  |
| C | -1.81714000 | -0.05651200 | -0.47213100 |
| C | -3.66952900 | -1.17304100 | -1.23786600 |
| C | 0.03390400  | 1.26488200  | 0.37265000  |
| C | 0.67445200  | -0.02082200 | 0.94404900  |
| C | 0.05530400  | 3.59711800  | 0.07099500  |
| C | -0.43806400 | 3.33079500  | -1.35202000 |
| C | -1.49268200 | 2.23044700  | -1.33111700 |
| H | -4.17286800 | -3.06663100 | -0.33214200 |
| H | -2.17868800 | -2.97039200 | 1.23139300  |
| H | -4.50579800 | -1.16912300 | -1.93322700 |
| H | -0.76377500 | 3.99417500  | 0.69010600  |
| H | 0.41133300  | 3.02536400  | -1.97520000 |
| H | -1.70456200 | 1.84855700  | -2.33190800 |
| N | -0.40570500 | -1.00092400 | 1.27640500  |
| N | -1.02810700 | 1.09710300  | -0.50471300 |
| N | 0.57870100  | 2.38174800  | 0.69046200  |
| O | -0.15036900 | -1.91332900 | 2.12878700  |
| C | 1.67612700  | -0.62225200 | -0.05536300 |
| C | 2.67089600  | 0.20715700  | -0.59161200 |
| C | 1.64554500  | -1.97605500 | -0.40478700 |
| C | 3.60883400  | -0.30933600 | -1.48306500 |
| H | 2.70729900  | 1.25069000  | -0.29739400 |
| C | 2.58545900  | -2.48761400 | -1.30134700 |
| H | 0.90787500  | -2.63801100 | 0.03364200  |
| C | 3.56487000  | -1.65741700 | -1.84560400 |
| H | 4.37713500  | 0.34144900  | -1.89176800 |
| H | 2.55233500  | -3.54055600 | -1.56713300 |
| H | 4.29508400  | -2.05917300 | -2.54297700 |
| H | -2.44169200 | 2.59831500  | -0.92275200 |
| H | -0.86705400 | 4.23291000  | -1.80129900 |
| H | 0.84966500  | 4.35068400  | 0.08041200  |
| O | 1.44466300  | 0.24013800  | 2.08055600  |
| N | -2.85960200 | -0.10506500 | -1.29612800 |
| O | 0.65350600  | 0.97246300  | 3.05860400  |
| H | 0.77129600  | 1.87064000  | 2.67598200  |

|                                              |                             |
|----------------------------------------------|-----------------------------|
| Zero-point correction=                       | 0.299909 (Hartree/Particle) |
| Thermal correction to Energy=                | 0.317536                    |
| Thermal correction to Enthalpy=              | 0.318480                    |
| Thermal correction to Gibbs Free Energy=     | 0.254346                    |
| Sum of electronic and zero-point Energies=   | -1062.573540                |
| Sum of electronic and thermal Energies=      | -1062.555913                |
| Sum of electronic and thermal Enthalpies=    | -1062.554969                |
| Sum of electronic and thermal Free Energies= | -1062.619103                |

**Table 2 SI:** Experimental (*exp* - in italic)<sup>a</sup> and computed<sup>b</sup> hyperfine coupling constants (hfccs in Gauss) and *g*-factors of isomeric **1b** spin adducts from a simultaneous relaxed PES scan of both C(7)-C(8)-C(23)-C(25) and N(19)-C(8)-C(37)-C(46) dihedral angles, according to the arbitrary atom labelling of manuscript Figure 2.

| <b>AminoxyI</b>   | <i>N-19</i>  | <i>H-12</i> | <i>H-14</i> | <i>H-13</i>  | <i>H-15</i>  | <i>N-21</i> | <i>H-16</i> | <i>H-36</i> | <i>g</i>       | <b>E (M062X)<sup>c</sup></b> | <b>H (M062X)<sup>c</sup></b> | <b>G (M062X)<sup>c</sup></b> | <b>ΔG (Kcal)<sup>d</sup></b> |
|-------------------|--------------|-------------|-------------|--------------|--------------|-------------|-------------|-------------|----------------|------------------------------|------------------------------|------------------------------|------------------------------|
| <b>1b-syn-1</b>   | 11.66        | 1.12        | 0.95        | -2.83        | -2.83        | 0.76        | 1.52        | 0.21        | 2.00563        | -1106.2193                   | -1106.2183                   | -1106.2902                   | 0.00                         |
| <b>1b-syn-13</b>  | 11.03        | 1.17        | 1.00        | -2.62        | -2.62        | 0.80        | 1.74        | 0.11        | 2.00568        | -1106.2155                   | -1106.2145                   | -1106.2847                   | 3.47                         |
| <b>1b-syn-25</b>  | 11.66        | 1.12        | 0.95        | -2.83        | -2.83        | 0.76        | 1.52        | 0.21        | 2.00565        | -1106.2177                   | -1106.2167                   | -1106.2885                   | 1.07                         |
| <b>1b-anti-1</b>  | 11.33        | 1.21        | 1.02        | -2.58        | -2.55        | 0.74        | 0.91        | 0.40        | 2.00571        | -1106.2167                   | -1106.2157                   | -1106.2875                   | 1.66                         |
| <b>1b-anti-13</b> | 9.58         | 1.15        | 1.03        | -3.14        | -3.15        | 0.18        | 0.77        | 0.14        | 2.00569        | -1106.2087                   | -1106.2078                   | -1106.2800                   | 6.37                         |
| <b>1b-anti-25</b> | 11.33        | 1.21        | 1.02        | -2.58        | -2.55        | 0.74        | 0.91        | 0.40        | 2.00571        | -1106.2167                   | -1106.2157                   | -1106.2875                   | 1.66                         |
| <i>exp</i>        | <i>10.17</i> | <i>1.07</i> | <i>0.85</i> | <i>-3.02</i> | <i>-2.73</i> | <i>0.37</i> | <i>0.54</i> | <i>0.23</i> | <i>2.00569</i> |                              |                              |                              |                              |

<sup>a</sup>: in benzene solution; <sup>b</sup>: manuscript ref. 20; <sup>c</sup>: in Hartrees from frequency computations at the M062X/6-31+G(d,p) level; <sup>d</sup>: Differences in Gibbs Free Energy (in Kcal/mol) from **1b-syn-1** assumed as the lowest Energy isomer.

**Figure 7 SI:** B3LYP/6-31G(d) optimised geometries of isomeric **1b** spin adducts from a simultaneous relaxed PES scan of both C(7)-C(8)-C(23)-C(25) and N(19)-C(8)-C(37)-C(46) dihedral angles, according to the arbitrary atom labelling of manuscript Figure 2.

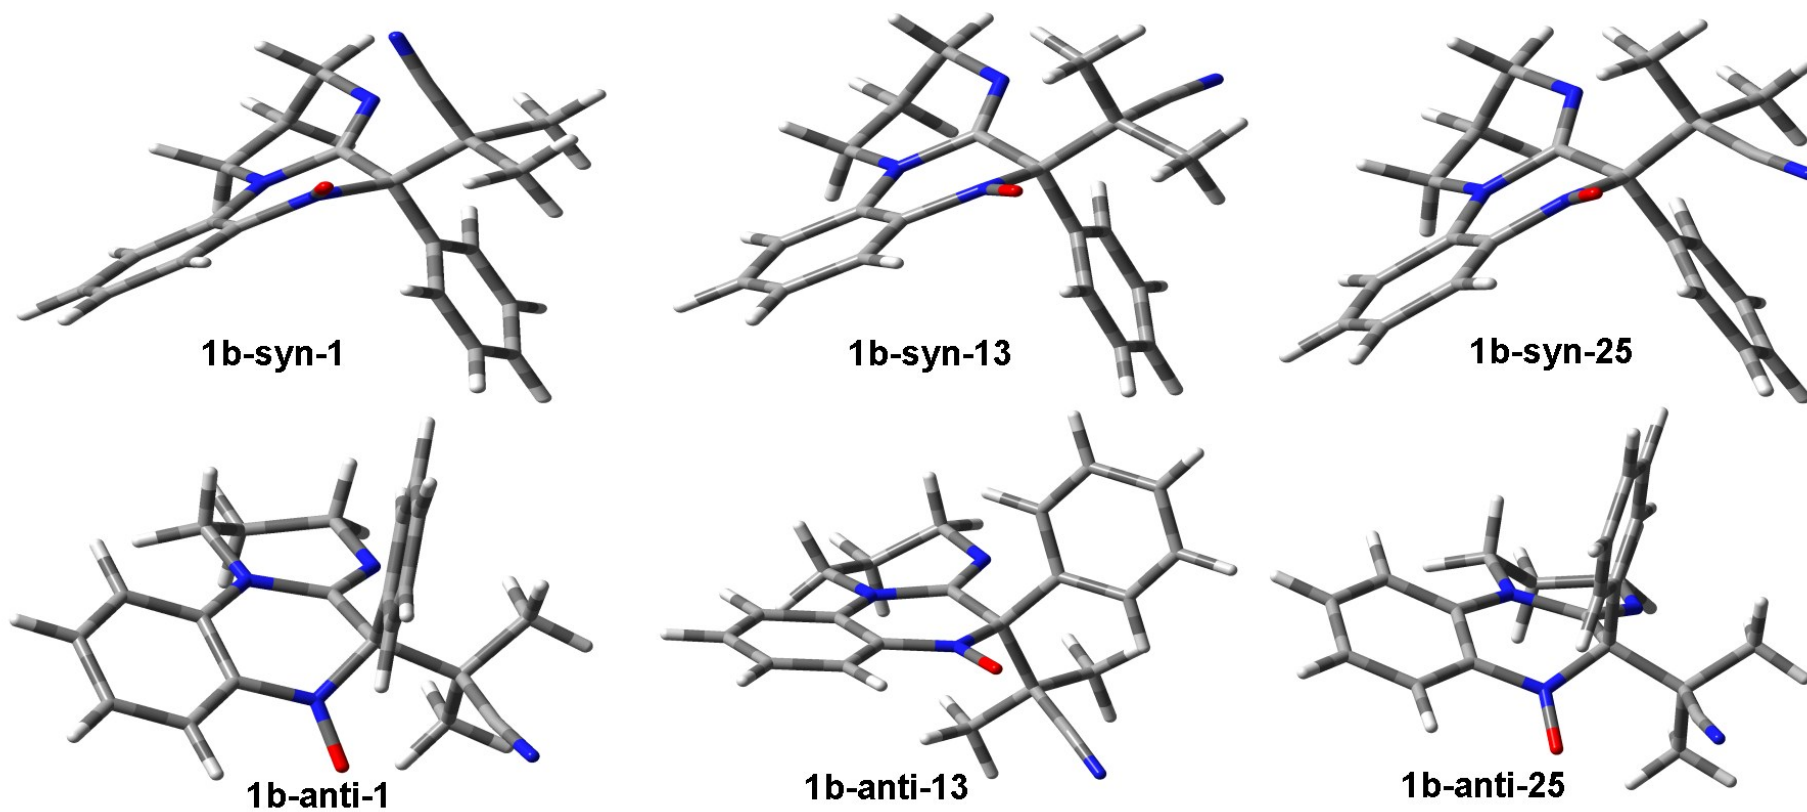

**Table 3 SI:** relative energies (Kcal/mol) and IHB distances (Å) and angles (°) for OH· and OOH· adducts

| Nitroxide | Geometry                    | IHB distance | IHB angle | Relative energy |
|-----------|-----------------------------|--------------|-----------|-----------------|
| <b>1c</b> | <b>1c,<i>syn</i>(N-O)</b>   | 2.04         | 115       | 0.59            |
|           | <b>1c,<i>anti</i>(N-O)</b>  | 2.03         | 114       | 1.95            |
|           | <b>1c,<i>syn</i>(amid)</b>  | 1.92         | 123       | 0.00            |
|           | <b>1c,<i>anti</i>(amid)</b> | 1.93         | 123       | 0.27            |
| <b>1e</b> | <b>1e,<i>syn</i>(N-O)</b>   | 1.89         | 136       | 1.10            |
|           | <b>1e,<i>anti</i>(N-O)</b>  | 2.10         | 123       | 1.13            |
|           | <b>1e,<i>syn</i>(amid)</b>  | 2.04         | 127       | 0.00            |
|           | <b>1e,<i>anti</i>(amid)</b> | 1.85         | 139       | 2.48            |
| <b>2c</b> | <b>2c,<i>syn</i>(N-O)</b>   | 2.33         | 107       | 2.01            |
|           | <b>2c,<i>anti</i>(N-O)</b>  | 2.24         | 110       | 2.02            |
|           | <b>2c,<i>syn</i>(amid)</b>  | 1.99         | 121       | 0.00            |
|           | <b>2c,<i>anti</i>(amid)</b> | 2.01         | 120       | 1.18            |
| <b>2e</b> | <b>2e,<i>syn</i>(N-O)</b>   | 1.93         | 137       | 2.02            |
|           | <b>2e,<i>anti</i>(N-O)</b>  | 2.79         | 107       | 0.00            |
|           | <b>2e,<i>syn</i>(amid)</b>  | 1.89         | 141       | 1.82            |
|           | <b>2e,<i>anti</i>(amid)</b> | 1.90         | 142       | 2.20            |
| <b>3c</b> | <b>3c,(N-O)</b>             | 2.09         | 112       | 0.00            |
|           | <b>3c,(amid)</b>            | 2.11         | 119       | 1.50            |
| <b>3e</b> | <b>3e,(N-O)</b>             | 2.15         | 122       | 0.00            |
|           | <b>3e,(amid)</b>            | 1.91         | 138       | 2.70            |
| <b>4c</b> | <b>4c,(N-O)</b>             | 2.10         | 111       | 0.00            |
|           | <b>4c,(amid)</b>            | 2.11         | 119       | 1.23            |
| <b>4e</b> | <b>4e,(N-O)</b>             | 2.14         | 122       | 0.00            |
|           | <b>4e,(amid)</b>            | 2.18         | 124       | 0.08            |
| <b>5c</b> | <b>5c,<i>syn</i>(N-O)</b>   | 2.07         | 113       | 1.07            |
|           | <b>5c,<i>anti</i>(N-O)</b>  | 2.60         | 100       | 3.40            |
|           | <b>5c,<i>syn</i>(amid)</b>  | 1.93         | 123       | 0.00            |
|           | <b>5c,<i>anti</i>(amid)</b> | 1.93         | 122       | 0.42            |
| <b>5e</b> | <b>5e,<i>syn</i>(N-O)</b>   | 2.14         | 121       | 0.85            |
|           | <b>5e,<i>anti</i>(N-O)</b>  | 2.14         | 121       | 1.11            |
|           | <b>5e,<i>syn</i>(amid)</b>  | 2.06         | 126       | 0.00            |
|           | <b>5e,<i>anti</i>(amid)</b> | 1.86         | 139       | 2.33            |

**Figure 8 SI:** IHB distances and angles in **3c** and **3e** adducts

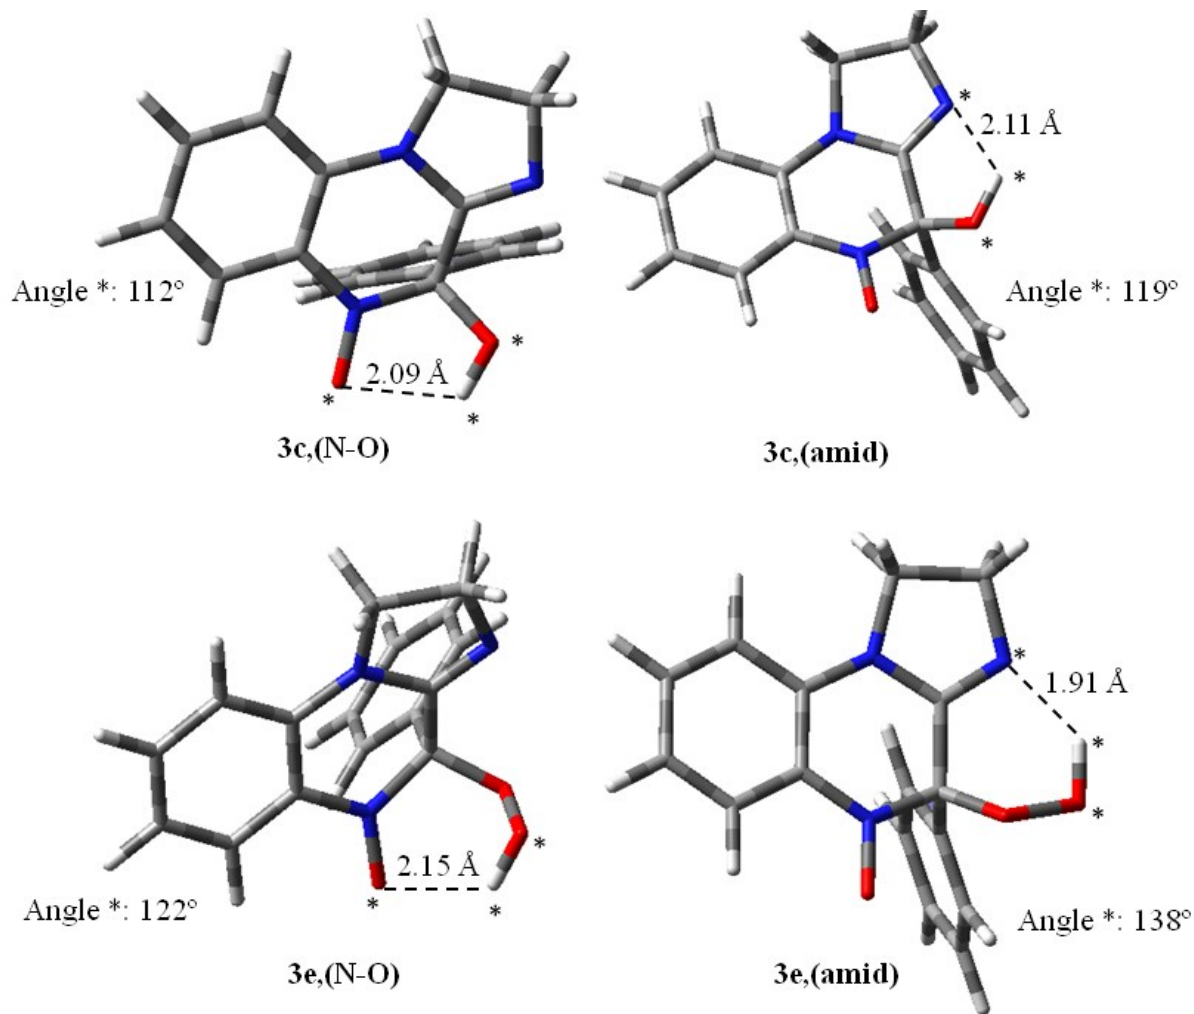

Table 4 SI: N(19) Pyramidalization degree

| Geometry             | N(19) Pyramidalization (°) |
|----------------------|----------------------------|
| <b>1a,syn</b>        | 2.09                       |
| <b>1a,anti</b>       | 1.15                       |
| <b>1b,syn</b>        | 1.89                       |
| <b>1b,anti</b>       | 0.07                       |
| <b>1c,anti(N-O)</b>  | 1.74                       |
| <b>1c,syn(amid)</b>  | 2.05                       |
| <b>1c,syn(N-O)</b>   | 0.80                       |
| <b>1c,anti(amid)</b> | 2.96                       |
| <b>1d,syn</b>        | 1.39                       |
| <b>1d,anti</b>       | 1.38                       |
| <b>1e,syn(N-O)</b>   | 0.75                       |
| <b>1e,syn(amid)</b>  | 1.71                       |
| <b>1e,anti(N-O)</b>  | 1.31                       |

|                      |      |
|----------------------|------|
| <b>1e,anti(amid)</b> | 0.82 |
| <b>2a,anti</b>       | 2.42 |
| <b>2a,syn</b>        | 0.43 |
| <b>2b,syn</b>        | 0.34 |
| <b>2b,anti</b>       | 0.13 |
| <b>2c,syn(N-O)</b>   | 1.25 |
| <b>2c,anti(N-O)</b>  | 0.09 |
| <b>2c,syn(amid)</b>  | 0.72 |
| <b>2c,anti(amid)</b> | 1.74 |
| <b>2d,syn</b>        | 2.43 |
| <b>2d,anti</b>       | 1.49 |
| <b>2e,anti(N-O)</b>  | 0.10 |
| <b>2e,syn(N-O)</b>   | 1.73 |
| <b>2e,anti(amid)</b> | 0.20 |
| <b>2e,syn(amid)</b>  | 0.05 |
| <b>3a</b>            | 0.97 |
| <b>3b</b>            | 1.81 |
| <b>3c,(N-O)</b>      | 0.77 |
| <b>3c,(amid)</b>     | 1.41 |
| <b>3d</b>            | 1.25 |
| <b>3e,(N-O)</b>      | 0.44 |
| <b>3e,(amid)</b>     | 0.75 |
| <b>4a</b>            | 1.33 |
| <b>4b</b>            | 1.83 |
| <b>4c,(N-O)</b>      | 0.81 |
| <b>4c,(amid)</b>     | 1.73 |
| <b>4d</b>            | 1.25 |
| <b>4e,(N-O)</b>      | 0.48 |
| <b>4e,(amid)</b>     | 1.28 |
| <b>5a,anti</b>       | 1.49 |
| <b>5a,syn</b>        | 2.03 |
| <b>5b,syn</b>        | 1.84 |
| <b>5b,anti</b>       | 0.01 |
| <b>5c,syn(N-O)</b>   | 0.84 |
| <b>5c,anti(N-O)</b>  | 2.73 |
| <b>5c,syn(amid)</b>  | 2.09 |
| <b>5c,anti(amid)</b> | 1.97 |
| <b>5d,syn</b>        | 1.34 |
| <b>5d,anti</b>       | 1.43 |
| <b>5e,anti(N-O)</b>  | 0.69 |
| <b>5e,syn(N-O)</b>   | 0.54 |
| <b>5e,anti(amid)</b> | 1.92 |
| <b>5e,syn(amid)</b>  | 1.65 |

---
